# Supplementary material for: Synthesis of 11 C-epoxides, aziridines, and cyclopropanes from structurally modified 11 C-sulfur ylides
Source: Royal Society of Chemistry journal article supplement (doi:10.1039/d5cc05951h), 2025-01-01
Supplement: d5cc05951h1.pdf [file d5cc05951h1.pdf]

## Supporting Information

### Synthesis of $^{11}\text{C}$ -Epoxides, Aziridines, and Cyclopropanes from Structurally Modified $^{11}\text{C}$ -Sulfur Ylides

Joshua D. Priest,<sup>1</sup> Casey J. McCarthy,<sup>1,2</sup> Xia Shao,<sup>1</sup> Peter J. H. Scott<sup>1,2,3\*</sup>

<sup>1</sup>Department of Radiology, University of Michigan, 2276 Medical Science Building I, 1301 Catherine Street, Ann Arbor, Michigan 48109, United States.

<sup>2</sup>Department of Medicinal Chemistry, University of Michigan College of Pharmacy, 428 Church St, Ann Arbor, MI 48109, United States.

<sup>3</sup>Department of Pharmacology, University of Michigan, Medical Sciences Research Building III, 1150 W Medical Center Dr, Ann Arbor, MI 48109, United States.

\*Corresponding author: pjhscott@umich.edu

## Table of Contents

|                                                                                                                     |           |
|---------------------------------------------------------------------------------------------------------------------|-----------|
| <b>General Experimental .....</b>                                                                                   | <b>3</b>  |
| <b>Synthesis of Authentic Standards.....</b>                                                                        | <b>4</b>  |
| (4i) - 2-(2-Methyl-2-oxiranyl)benzofuran (CAS # 64481-23-8) .....                                                   | 4         |
| <b>Synthesis of 3p (Apinocaltamide Precursor).....</b>                                                              | <b>5</b>  |
| 6-((3-nitro-1H-pyrazol-1-yl)methyl)nicotinonitrile (3p-Int-1) (CAS # 1838653-23-8) .....                            | 5         |
| 6-((3-amino-1H-pyrazol-1-yl)methyl)nicotinonitrile (3p-Int-2) (CAS # 1838633-02-5) .....                            | 5         |
| methyl 2-(4-(3,3,3-trifluoroprop-1-en-2-yl)phenyl)acetate (3p-Int-3) .....                                          | 5         |
| 2-(4-(3,3,3-trifluoroprop-1-en-2-yl)phenyl)acetic acid (3p-Int-4) (CAS # 1994969-25-3) .....                        | 5         |
| N-(1-((5-cyanopyridin-2-yl)methyl)-1H-pyrazol-3-yl)-2-(4-(3,3,3-trifluoroprop-1-en-2-yl)phenyl)acetamide (3p) ..... | 6         |
| <b>NMR Spectra .....</b>                                                                                            | <b>7</b>  |
| (4i) - 2-(2-Methyl-2-oxiranyl)benzofuran (CAS # 64481-23-8) .....                                                   | 7         |
| <sup>1</sup> H NMR.....                                                                                             | 7         |
| <sup>13</sup> C NMR.....                                                                                            | 7         |
| N-(1-((5-cyanopyridin-2-yl)methyl)-1H-pyrazol-3-yl)-2-(4-(3,3,3-trifluoroprop-1-en-2-yl)phenyl)acetamide (3p) ..... | 8         |
| <sup>1</sup> H NMR.....                                                                                             | 8         |
| <sup>13</sup> C NMR.....                                                                                            | 8         |
| <sup>19</sup> F NMR .....                                                                                           | 9         |
| <b>Radiochemistry.....</b>                                                                                          | <b>10</b> |
| Preparation of [ <sup>11</sup> C]MeI and [ <sup>11</sup> C]MeOTf .....                                              | 10        |
| Manual Radiochemistry General Procedure .....                                                                       | 10        |
| rHPLC and rTLC Analysis.....                                                                                        | 10        |
| HPLC conditions .....                                                                                               | 11        |
| Automated Radiochemistry Procedure .....                                                                            | 12        |
| <b>Analytical Data for Manual Substrates .....</b>                                                                  | <b>19</b> |
| 4a .....                                                                                                            | 19        |
| 4b .....                                                                                                            | 21        |
| 4c .....                                                                                                            | 23        |
| 4e .....                                                                                                            | 25        |
| 4f .....                                                                                                            | 27        |
| 4g .....                                                                                                            | 29        |
| 4h .....                                                                                                            | 31        |
| 4i .....                                                                                                            | 33        |
| 4j .....                                                                                                            | 35        |
| 4k .....                                                                                                            | 37        |
| 4l .....                                                                                                            | 39        |
| 4m .....                                                                                                            | 41        |
| 4n .....                                                                                                            | 43        |
| 4o .....                                                                                                            | 45        |
| 4p .....                                                                                                            | 47        |
| 5 .....                                                                                                             | 49        |
| <b>References.....</b>                                                                                              | <b>51</b> |

## General Experimental

Commercially available reagents/solvents including **4c** (chloro aldehyde), **4d** (methoxy aldehyde), **4f** (epoxypropylbenzene), **4h** (sulfone), **4k** (piperidone), **4n** (Ts aziridine) were obtained from Ambeed, Combi-Blocks, Enamine, Millipore-Sigma, Oakwood Chemical, Thermo-Scientific, TCI America and were used without further purification. Where necessary, reactions were conducted under an Argon atmosphere in flame dried glassware, PTFE coated stir bars were used for all reactions.

Thin layer chromatography was used to monitor reaction progress (Merck Supelco Silica gel 60 F<sub>254</sub> glass plates) and was visualised by UV<sub>254</sub> and heat developed KMnO<sub>4</sub> or Vanillin. Flash chromatography was conducted on a Biotage Isolera Prime using Biotage Sfär flash purification columns, eluents were Hexanes:EtOAc mixtures (containing 1% Et<sub>3</sub>N for epoxide purifications).

NMR spectra were acquired using a Varian 500 MHz VNMRS (<sup>1</sup>H = 500 MHz, <sup>13</sup>C = 126 MHz) or a Varian 400 MHz MR (<sup>1</sup>H = 400 MHz, <sup>13</sup>C = 101 MHz) spectrometer at ambient temperature. TMS free deuterated NMR solvents were obtained from Cambridge Isotope Labs or Thermo-Scientific. Chemical shifts (δ) are reported in ppm relative to TMS and spectra are calibrated using residual solvent peaks. Multiplicity is reported as: s (singlet), d (doublet), t (triplet), q (quadruplet), m (multiplet), br. (broad).

A Shimadzu LC20AD/T LPGEKIT system was used for HPLC analysis, featuring a CBM-20A controller, DGU 20A SR degassing unit, SIL 20AHT injector, CTO-20A column oven, SPD 20A UV/Vis detector and B-FC-1000 gamma radiation detector. Radio-TLC analysis was performed on a Bioscan AR 2000 rTLC scanner (Merck Supelco Silica gel 60 F<sub>254</sub> glass plates cut to 6.5 × 2.0 cm).

## Synthesis of Authentic Standards

Compounds **4a** (naphthalene),<sup>1</sup> **4b** (ester aldehyde),<sup>2, 3</sup> **4e** (pyridine),<sup>4</sup> **4g** (ester ketone),<sup>5</sup> **4i** (benzofuran), **4j** (benzothiophene),<sup>2</sup> **4l** (isatin),<sup>6</sup> **4m** (Ph aziridine),<sup>7, 8</sup> **4o** (quinoline cyclopropane),<sup>9</sup> were prepared according to previously-reported procedures and spectra agreed with values from the prior literature.

### (4i) - 2-(2-Methyl-2-oxiranyl)benzofuran (CAS # 64481-23-8)

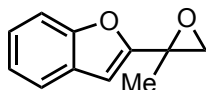

In a flame dried Schlenk tube held under an Ar<sub>(g)</sub> atmosphere, dry DMSO (5.0 mL) and dry THF (2.5 mL) were combined with Me<sub>3</sub>SI (1.46 g, 7.13 mmol, 1.6 equiv.) and cooled to 0 °C (ice/water). To this solution was carefully added NaH (60% in mineral oil, 258 mg, 6.45 mmol, 1.5 equiv.), following complete addition the reaction mixture was allowed to warm to rt and stirred for 1 h. The reaction mixture was again cooled to 0 °C (ice/water) before 1-(benzofuran-2-yl)ethan-1-one (711 mg, 4.44 mmol, 1.0 equiv.) was introduced as a solution in dry THF (1.5 mL) dropwise over ca. 5 mins. The reaction mixture was allowed to warm to rt and stirred for 20 h before quenching with H<sub>2</sub>O, diluting with Et<sub>2</sub>O (25 mL) and H<sub>2</sub>O (50 mL) and transferred to a separatory funnel. The organic fraction was separated and the aqueous further extracted with Et<sub>2</sub>O (2 × 25 mL). The pooled extracts were then washed with H<sub>2</sub>O (3 × 50 mL) and saturated NaCl<sub>(aq.)</sub>, dried over MgSO<sub>4</sub>, filtered and concentrated by rotary evaporation under reduced pressure. Residue purified by automated SiO<sub>2</sub> flash column chromatography (Hexanes:Et<sub>3</sub>N, 99:1). Compound **4i** obtained as a white solid (627 mg, 81%).

**<sup>1</sup>H NMR (500 MHz, CDCl<sub>3</sub>)** δ 7.55 (d, *J* = 7.6, 1H), 7.45 (d, *J* = 8.2, 1H), 7.29 (app. t, *J* = 8.0 Hz, 1H), 7.23 (app. t, *J* = 7.6 Hz, 1H), 6.77 (s, 1H), 3.47 (d, *J* = 5.3 Hz, 1H), 3.06 (d, *J* = 5.3 Hz, 1H), 1.81 (s, 3H).

**<sup>13</sup>C NMR (126 MHz, CDCl<sub>3</sub>)** δ 156.0, 154.9, 128.3, 124.7, 123.0, 121.0, 111.4, 105.2, 55.3, 52.5, 19.5.

**HRMS (APCI+Q-TOF):** *m/z* calcd for C<sub>11</sub>H<sub>11</sub>O<sub>2</sub>: 175.0754; Found 175.0749 [M+H]<sup>+</sup>.

### Synthesis of 3p (Apinocaltamide Precursor)

#### 6-((3-nitro-1H-pyrazol-1-yl)methyl)nicotinonitrile (3p-Int-1) (CAS # 1838653-23-8)

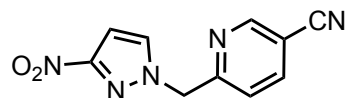

Synthesised as previously reported by Fournier et al. (White solid, 76%).<sup>10</sup>

#### 6-((3-amino-1H-pyrazol-1-yl)methyl)nicotinonitrile (3p-Int-2) (CAS # 1838633-02-5)

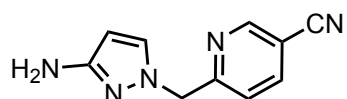

Synthesised as previously reported by Fournier et al. (White solid, 86%).<sup>10</sup>

#### methyl 2-(4-(3,3,3-trifluoroprop-1-en-2-yl)phenyl)acetate (3p-Int-3)

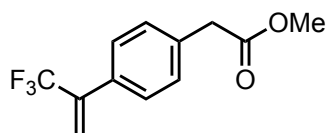

Synthesised as previously reported by Xiao et al. and Zhang et al. (Pale yellow liquid, 46%).<sup>11, 12</sup>

#### 2-(4-(3,3,3-trifluoroprop-1-en-2-yl)phenyl)acetic acid (3p-Int-4) (CAS # 1994969-25-3)

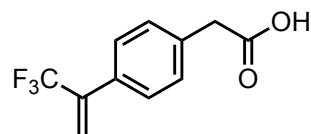

A solution of the ester **3p-Int-3** (498 mg, 2.04 mmol, 1.0 equiv.) in THF (5.5 mL) was cooled to 0 °C (ice/water) and 1.0M LiOH<sub>(aq.)</sub> (3.0 mL, 3.0 mmol, 1.5 equiv.) added followed by <sup>i</sup>PrOH (1.1 mL). The reaction mixture was stirred at 0 °C for 10 mins before removal of the cooling bath. After warming to rt the reaction mixture was stirred for 4 h before concentrating by rotary evaporation under reduced pressure. The residue obtained was dissolved in H<sub>2</sub>O (7 mL), placed in a separatory funnel and washed with Et<sub>2</sub>O (2 × 4 mL). The aqueous layer was then acidified with 1M HCl<sub>(aq.)</sub> (8 mL) and extracted with EtOAc (4 × 6 mL), the pooled extracts were dried over MgSO<sub>4</sub> filtered and the solvent removed by rotary evaporation under reduced pressure. Compound **3p-Int-4** was obtained as a pale orange solid (406 mg, 87%)

<sup>1</sup>H NMR (500 MHz, CDCl<sub>3</sub>) δ 10.16 (br. s, 1H), 7.43 (d, *J* = 7.9 Hz, 2H), 7.31 (d, *J* = 7.9 Hz, 2H), 5.96 (s, 1H), 5.77 (s, 1H), 3.68 (s, 2H)

<sup>13</sup>C NMR (126 MHz, CDCl<sub>3</sub>) δ 177.53, 138.64 (q, *J* = 30.5 Hz), 134.22, 132.89, 129.77, 127.79, 123.42 (q, *J* = 274.2 Hz), 120.64 (q, *J* = 5.7 Hz), 40.77.

HRMS (EI<sup>+</sup>): *m/z* calcd for C<sub>11</sub>H<sub>9</sub>F<sub>3</sub>O<sub>2</sub>: 230.0555; Found 230.0562 [M]<sup>+</sup>.

***N*-(1-((5-cyanopyridin-2-yl)methyl)-1H-pyrazol-3-yl)-2-(4-(3,3,3-trifluoroprop-1-en-2-yl)phenyl)acetamide (3p)**

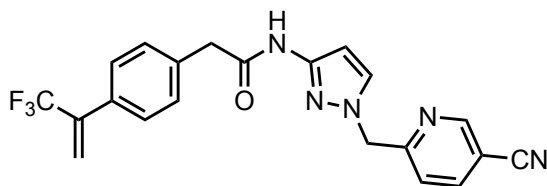

In a round bottomed flask 2-(4-(3,3,3-trifluoroprop-1-en-2-yl)phenyl)acetic acid (**3p-Int-4**) (360 mg, 1.56 mmol, 1.0 equiv.) was dissolved in dry MeCN (12.0 mL), HATU (629 mg, 1.66 mmol, 1.05 equiv.) was then added followed by DIPEA (0.59 mL, 3.4 mmol, 2.2 equiv.). The reaction mixture was stirred for 5 mins at rt before the addition of 6-((3-amino-1H-pyrazol-1-yl)methyl)nicotinonitrile (**3p-Int-2**) (311 mg, 1.56 mmol, 1.0 equiv.). After 19 h the solvent was removed by rotary evaporation under reduced pressure and the residue dissolved in EtOAc (30 mL) and transferred to a separatory funnel. The organic fraction was washed with 0.1 M HCl<sub>(aq.)</sub> (20 mL) followed by saturated NaHCO<sub>3 (aq.)</sub> (20 mL) and finally H<sub>2</sub>O (20 mL). The organic fraction was then dried over MgSO<sub>4</sub>, filtered and concentrated by rotary evaporation under reduced pressure. The residue was then purified by automated SiO<sub>2</sub> flash column chromatography (Hexanes:EtOAc, 100:0 → 30:70). Compound **3p** was isolated as a white solid (289 mg, 52%).

**<sup>1</sup>H NMR (500 MHz, DMSO)** δ 10.74 (s, 1H), 8.98 (d, *J* = 2.2 Hz, 1H), 8.28 (dd, *J* = 8.2, 2.2 Hz, 1H), 7.79 (d, *J* = 1.8 Hz, 1H), 7.44 (d, *J* = 7.9 Hz, 2H), 7.38 (d, *J* = 7.9 Hz, 2H), 7.18 (d, *J* = 8.2 Hz, 1H), 6.53 (d, *J* = 1.8 Hz, 1H), 6.05 (app. d, *J* = 5.3 Hz, 2H), 5.44 (s, 2H), 3.62 (s, 2H).

**<sup>13</sup>C NMR (126 MHz, DMSO)** δ 167.9, 161.3, 152.2, 148.0, 140.9, 137.2, 136.7 (q, *J* = 29.3 Hz), 131.9, 130.9, 129.6, 126.9, 123.4 (q, *J* = 274.2 Hz), 121.9 (q, *J* = 5.7 Hz), 121.7, 116.9, 107.9, 97.1, 56.1, 42.1

**<sup>19</sup>F NMR (470 MHz, DMSO)** δ -63.32.

**HRMS (ESI-TOF):** *m/z* calcd for C<sub>21</sub>H<sub>17</sub>F<sub>3</sub>N<sub>5</sub>O: 412.1380; Found 412.1379 [M+H]<sup>+</sup>.

# NMR Spectra

(4i) - 2-(2-Methyl-2-oxiranyl)benzofuran (CAS # 64481-23-8)

<sup>1</sup>H NMR

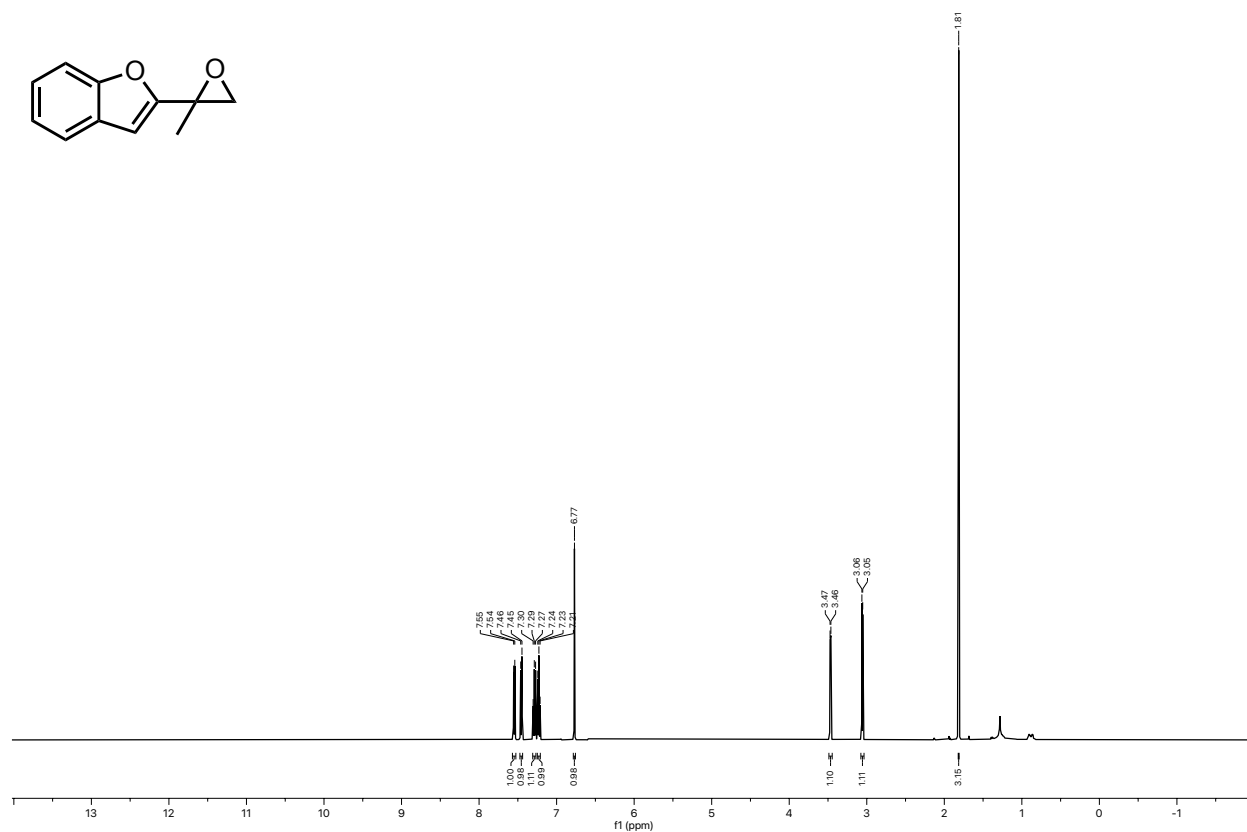

<sup>13</sup>C NMR

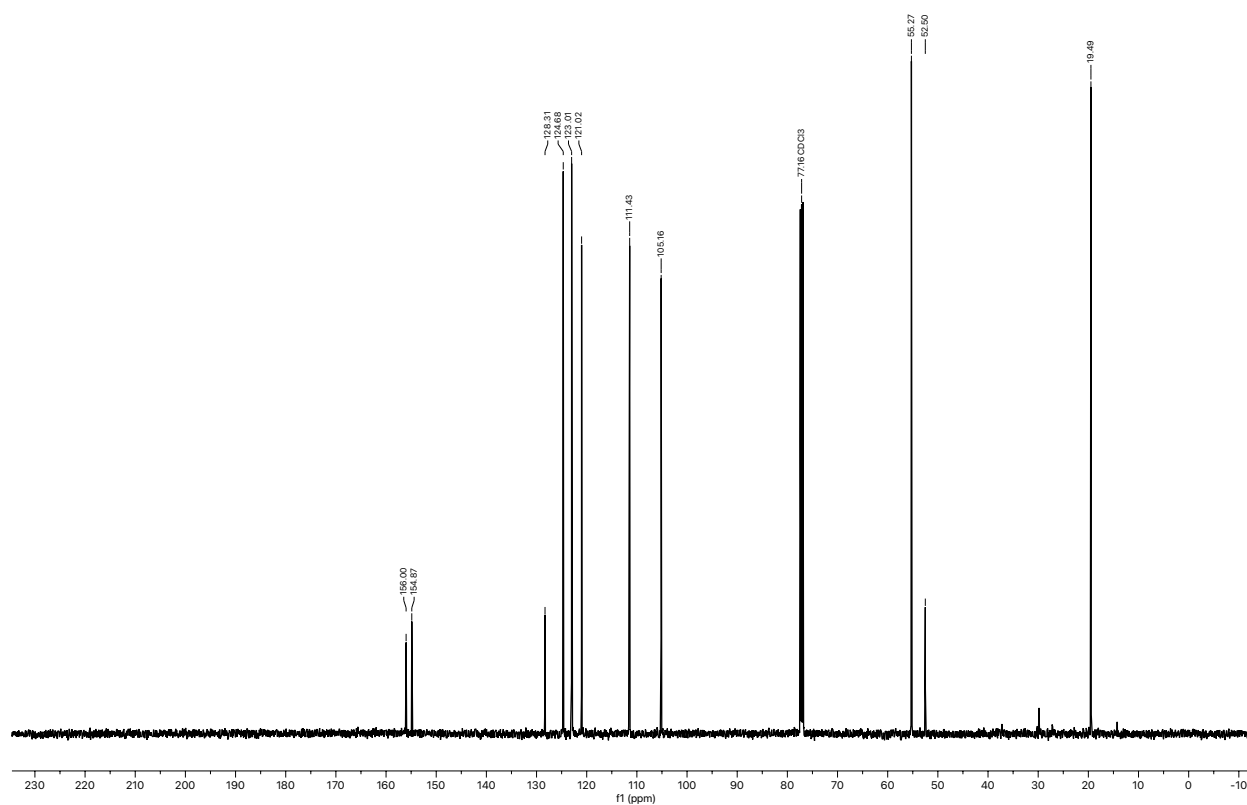

***N*-(1-((5-cyanopyridin-2-yl)methyl)-1H-pyrazol-3-yl)-2-(4-(3,3,3-trifluoroprop-1-en-2-yl)phenyl)acetamide (3p)**

**<sup>1</sup>H NMR**

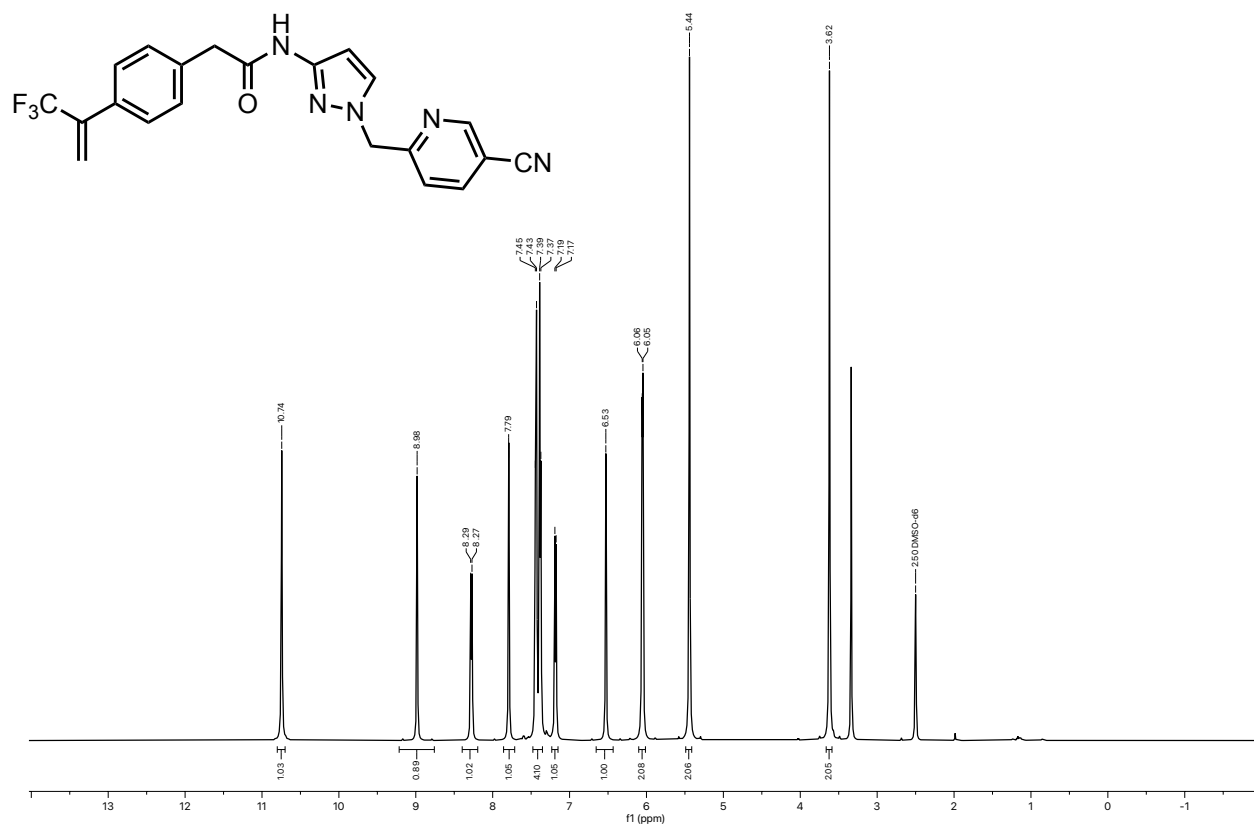

**<sup>13</sup>C NMR**

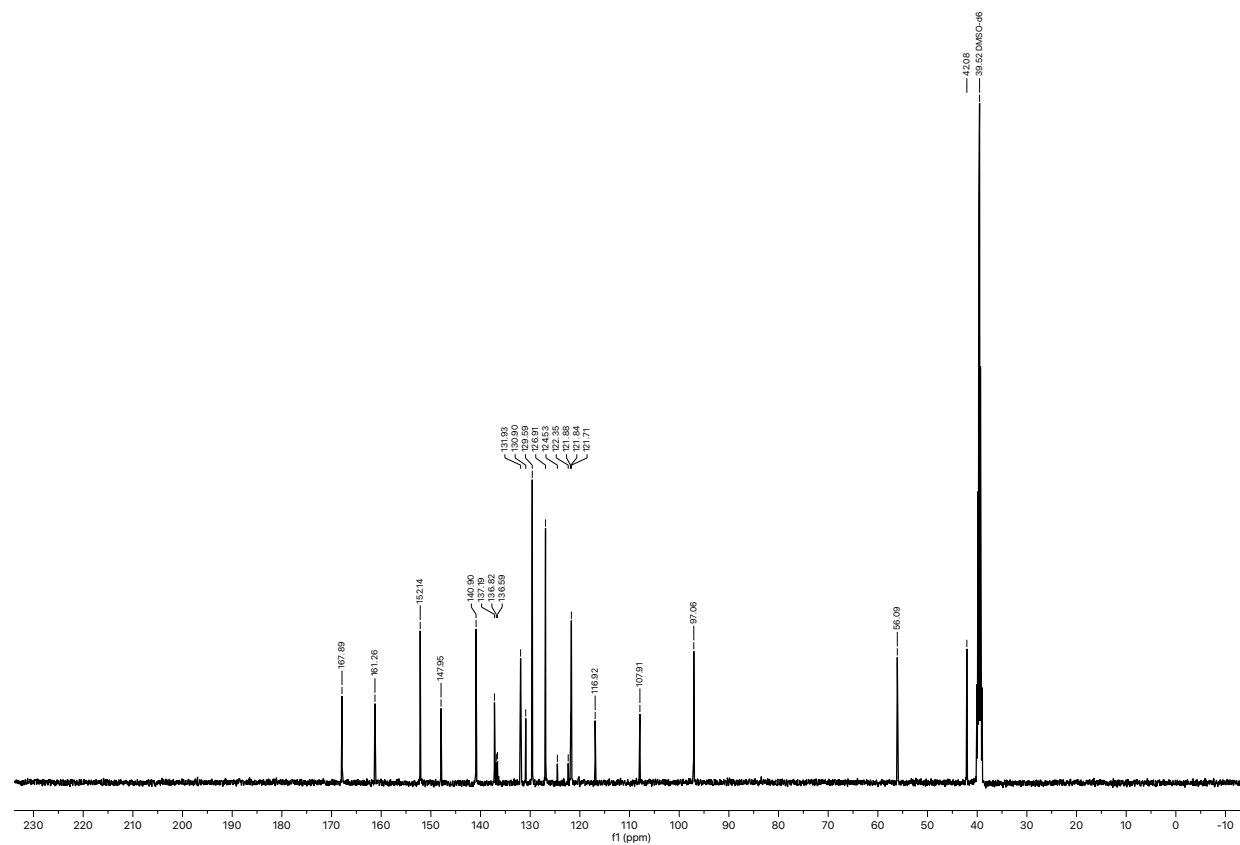



**$^{19}\text{F}$  NMR**

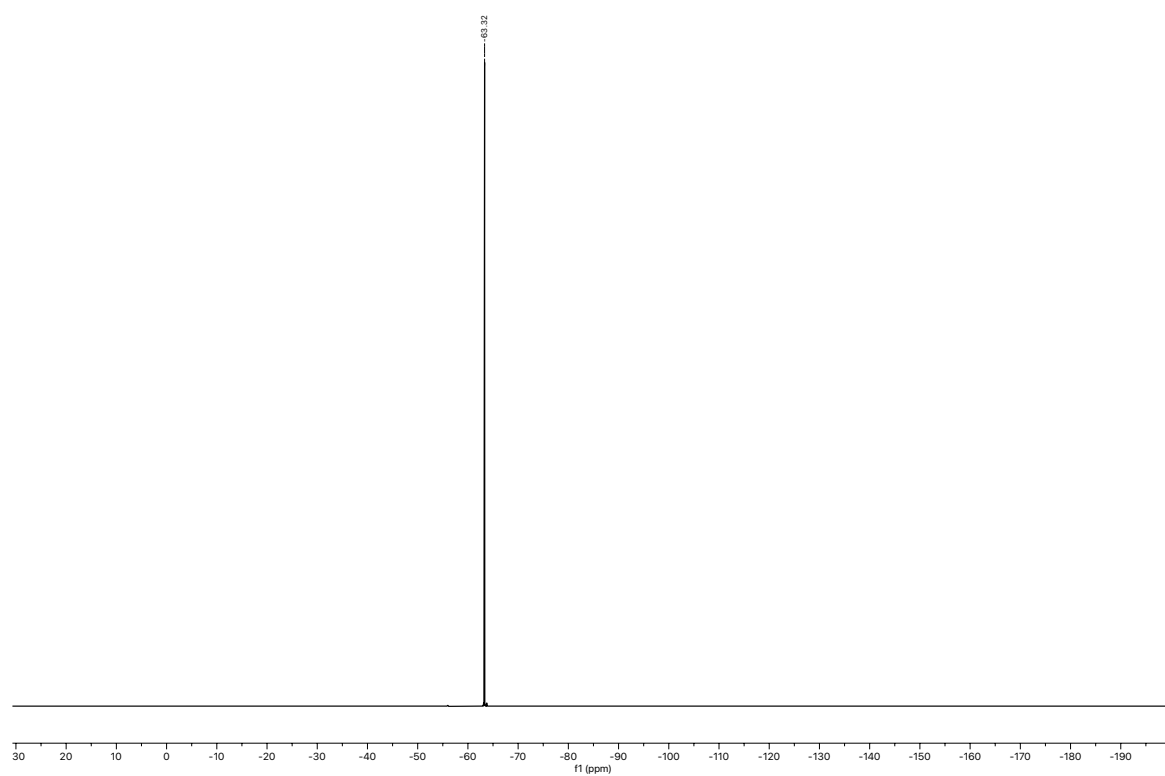

## Radiochemistry

### ***Preparation of [<sup>11</sup>C]MeI and [<sup>11</sup>C]MeOTf***

Using a GE TRACERlab FX<sub>C-Pro</sub> synthesis module. [<sup>11</sup>C]CO<sub>2</sub> was produced *via* the <sup>14</sup>N(p,α)<sup>11</sup>C nuclear reaction using a GE PETtrace cyclotron in a <sup>14</sup>N<sub>2</sub> + 0.5% O<sub>2</sub> gas target (16.4 MeV proton irradiation at 60 μA for 2 mins or 15 mins). [<sup>11</sup>C]CO<sub>2</sub> from the target was mixed with H<sub>2</sub> over a preheated nickel oven at 400 °C for conversion to [<sup>11</sup>C]CH<sub>4</sub>. [<sup>11</sup>C]CH<sub>3</sub>I was formed by standard procedures with iodine in a circulation loop and converted to [<sup>11</sup>C]CH<sub>3</sub>OTf by passage through a AgOTf column where applicable. The <sup>11</sup>C-methylating reagent was then delivered to a PTFE/silicone septa-equipped vial containing the relevant solvent (1.8 mL) or sulfide solution (10-20 μmol., 1.8 mL) in the case of [<sup>11</sup>C]CH<sub>3</sub>OTf, and this solution was then used in the manual protocol. In the case of the automated protocol, [<sup>11</sup>C]CH<sub>3</sub>I was transferred directly to a GE TRACERlab FX2<sub>M</sub> synthesis module through the transfer line.

### ***Manual Radiochemistry General Procedure***

The relevant sulfide (20 μmol) and AgOTf (20 μmol) were loaded into a 4 mL glass vial with PTFE/silicone septa cap and magnetic stir bar. To this was then added a solution of [<sup>11</sup>C]CH<sub>3</sub>I in PhCl (100-300 μL, *depending on amount of activity required*) produced as described above, and additional PhCl if needed (to achieve 300 μL final volume). The reaction vial was then sealed and placed in a preheated heating block at 60 °C with stirring for 5 mins, following this a 200 μL aliquot was transferred to a second 4 mL PTFE/silicone septa capped vial containing the relevant base (20-40 μmol, 1-2 equiv.) and a magnetic stir bar. The relevant starting material (20 μmol, 1 equiv.) was then introduced as a solution in MeCN (200 μL) and the vial placed in a preheated heating block with stirring (time and temperature as described), for all epoxides, aziridines and cyclopropanes the reaction mixtures were analysed as detailed below. For the formation of diol compound **5**, the reaction vial was briefly cooled (1 min) by removal from the heating block before the addition of H<sub>2</sub>O (8 μL, 400 μmol) and trifluoroacetic acid (12 μL, 160 μmol) and then returned to a preheated heating block at 120 °C with stirring for 5 mins. Analysis of **5** was then performed in an identical fashion to all other compounds (see below).

### ***rHPLC and rTLC Analysis***

Following reaction completion, the vial was removed from the heating block and cooled briefly (1 min) before filtration through a HPLC syringe filter (PTFE, 0.2 μm, 13 mm). The solution obtained was then analysed directly by rTLC (SiO<sub>2</sub> glass backed plates 6.5 × 2.0 cm, eluent Hexanes:EtOAc [1:1]) and an aliquot (200 μL) placed in a HPLC vial, if required internal standard was added as a solution in MeCN (10-50 μL), and the sample analysed by rHPLC.

## HPLC conditions

The value for **X** is specified for each substrate.

### Condition A

UV/Vis Detector: 220 nm  
Column: HydroRP 250 × 4.6 mm  
Solvent A: 10 mM NH<sub>4</sub>OAc<sub>(aq.)</sub> at pH 6.5  
Solvent B: MeCN

0 – 8 min X% B  
8 – 8.5 min X% to 75% B  
8.5 – 13 min 75% B  
13 – 13.5 min 75% B to X% B  
13.5 – 15 min X% B

### Condition B

UV/Vis Detector: 220 nm  
Column: HydroRP 250 × 4.6 mm  
Solvent A: 10 mM NH<sub>4</sub>OAc<sub>(aq.)</sub> at pH 6.5  
Solvent B: MeCN

0 – 15 min X% B  
15 – 15.5 min X% to 75% B  
15.5 – 19 min 75% B  
19 – 19.5 min 75% B to X% B  
19.5 – 23 min X% B

### Condition C

UV/Vis Detector: 220 nm  
Column: HydroRP 250 × 4.6 mm  
Solvent A: 10 mM NH<sub>4</sub>OAc<sub>(aq.)</sub> at pH 6.5  
Solvent B: MeCN

0 – 12 min X% B  
12 – 12.5 min X% to 75% B  
12.5 – 16 min 75% B  
16 – 16.5 min 75% B to X% B  
16.5 – 20 min X% B

### Condition D

UV/Vis Detector: 220 nm  
Column: HydroRP 250 × 4.6 mm  
Solvent A: 10 mM NH<sub>4</sub>OAc<sub>(aq.)</sub> at pH 6.5  
Solvent B: MeCN

0 – 8 min X% B  
8 – 8.5 min X% to 75% B  
8.5 – 18 min 75% B  
18 – 18.5 min 75% B to X% B  
18.5 – 20 min X% B

### Condition E

UV/Vis Detector: 220 nm  
Column: HydroRP 250 × 4.6 mm  
Solvent A: 10 mM NH<sub>4</sub>OAc<sub>(aq.)</sub> at pH 6.5  
Solvent B: MeCN

0 – 20 minutes: X% B  
20 – 20.5 minutes: X% to 75% B  
20.5 – 24 minutes: 75% B  
24 – 24.5 minutes: 75% B to X% B  
24.5 – 28 minutes: X% B

## Automated Radiochemistry Procedure

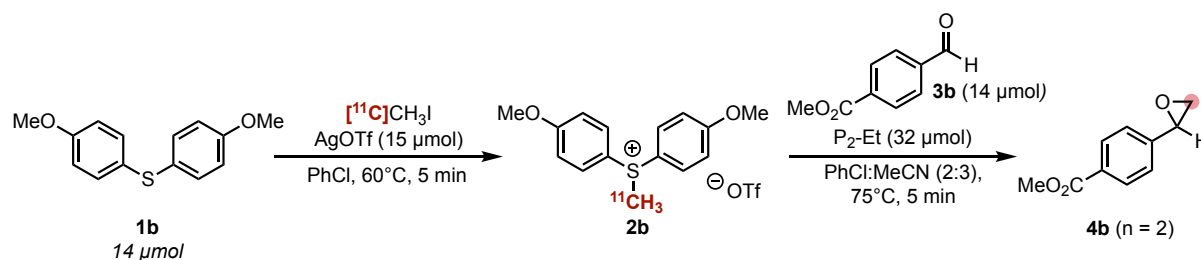

Automation was performed on a GE TRACERlab FX2 M module (see above for  $[^{11}\text{C}]\text{MeI}$  synthesis, see below for module configuration). Into an oven dried glass reactor  $\text{AgOTf}$  (3.9 mg, 15 μmol, 1 equiv.) and a magnetic stir bar was loaded followed by the addition of bis(4-methoxyphenyl)sulfane **1b** (3.5 mg, 14 μmol, 1 equiv.) as a solution in dry  $\text{PhCl}$  (200 μL). The reactor was then attached to the module,  $[^{11}\text{C}]\text{CH}_3\text{I}$  was then delivered *via* a transfer line and the open valves closed and heated to  $60^\circ\text{C}$  with stirring for 5 mins. The reaction mixture was then cooled to  $40^\circ\text{C}$  with a stream of  $\text{N}_2$  before the addition of phosphazene base  $\text{P}_2\text{-Et}$  (11 mg, 32 μmol, 2 equiv.) as a solution in dry  $\text{MeCN}$  (150 μL) from a 1.5 mL total recovery glass snap top microvial which had been attached in place of valve 1. The reaction mixture was stirred for 15 s before the addition of methyl 4-formylbenzoate **3b** (2.3 mg, 14 μmol, 1 equiv.) as a solution in dry  $\text{MeCN}$  (150 μL) *via* vial 2 before again closing the open valves and heating to  $75^\circ\text{C}$  for 5 mins. The reaction mixture was cooled to  $0^\circ\text{C}$  in a stream of  $\text{N}_2$  before the addition of 0.7 mL of HPLC eluent (10 mM  $\text{NH}_4\text{OAc}_{(\text{aq})}$  pH 6.5, 40%  $\text{MeCN}$ ), stirred for *ca.* 1 min and the majority transferred to an HPLC injection loop for purification, a small fraction was allowed to run to waste and collected for RCC analysis by HPLC (condition D). Synthesis time of 19 mins. Purification was carried out with a Prodigy 10μ ODS-Prep (250 × 10 mm, 10 μ) semi-preparative HPLC column using an isocratic eluent (10 mM  $\text{NH}_4\text{OAc}_{(\text{aq})}$  pH 6.5, 40%  $\text{MeCN}$ ) at a flow rate of  $6\text{ mL min}^{-1}$ . The peak of interest (retention time *ca.* 10.5 mins) was isolated, measured for activity and analysed by HPLC (condition A).

Molar activity was calculated based upon the UV peak corresponding to the radioactivity peak of interest. As no significant absorption was observed, discovering the limit of detection of compound **4b** by UV was completed using a range of standard solutions ( $0.1\text{ mg mL}^{-1}$  to  $0.0001\text{ mg mL}^{-1}$ ). Molar activity for **4b** was found to be  $>710\text{ mCi } \mu\text{mol}^{-1}$ .

## Automation Crude Semi-Preparative Purification

Product: C-11, Process: Josh, Batch No.: 013025JOSH, Operator: Admin, Start of Synthesis: 1/30/2025 18:56:14 , Page 1/1

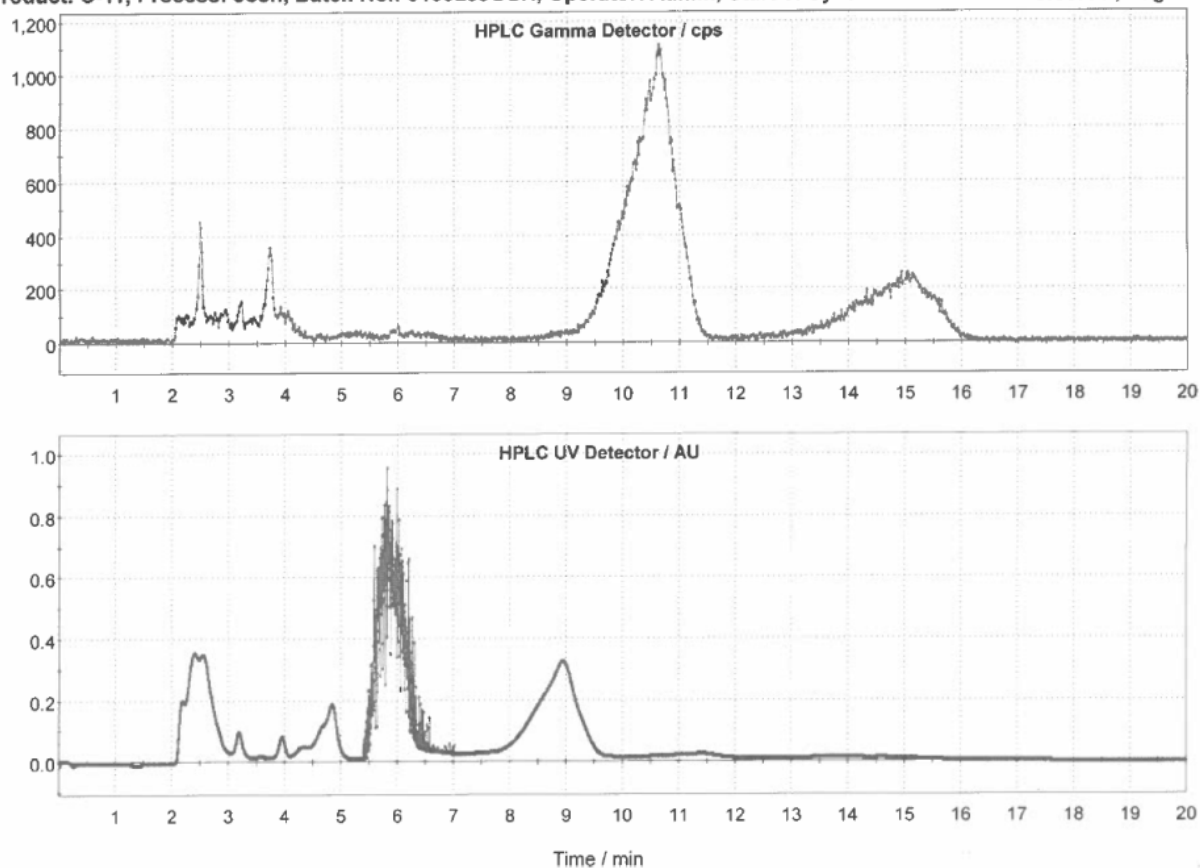

### Details:

Prodigy 10 $\mu$  ODS-Prep (250  $\times$  10 mm, 10  $\mu$ ) HPLC column using an isocratic eluent (10 mM NH<sub>4</sub>OAc<sub>(aq)</sub> pH 6.5, 40% MeCN) at a flow rate of 6 mL min<sup>-1</sup>, peak at ~10.5 min (gamma) isolated.

## Automation - Crude Analytical Data

### UV Trace

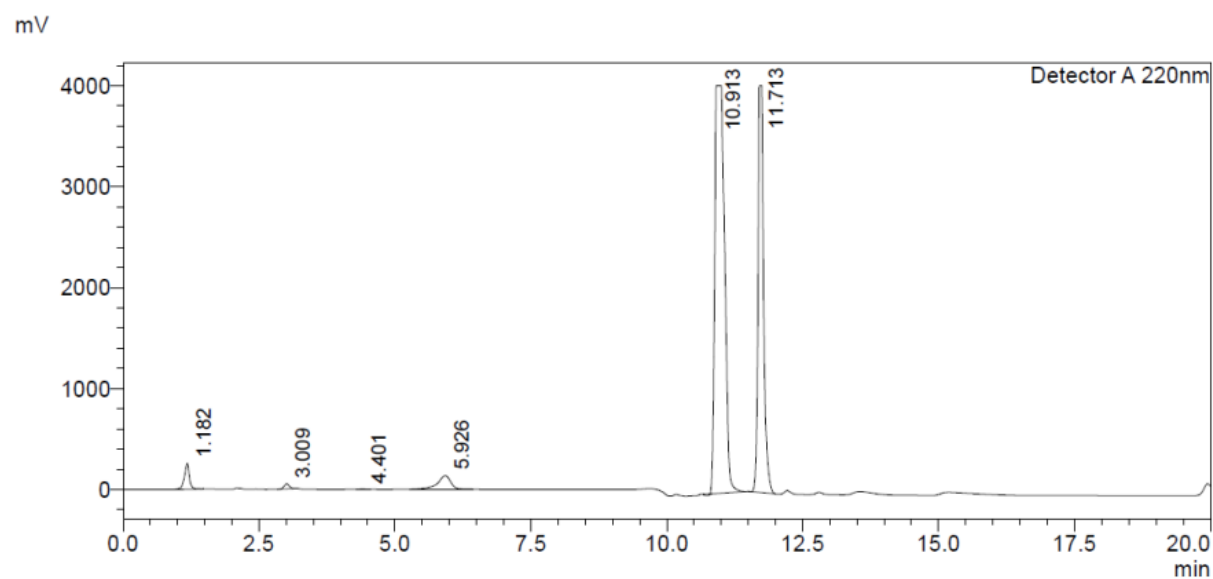

### Gamma Trace

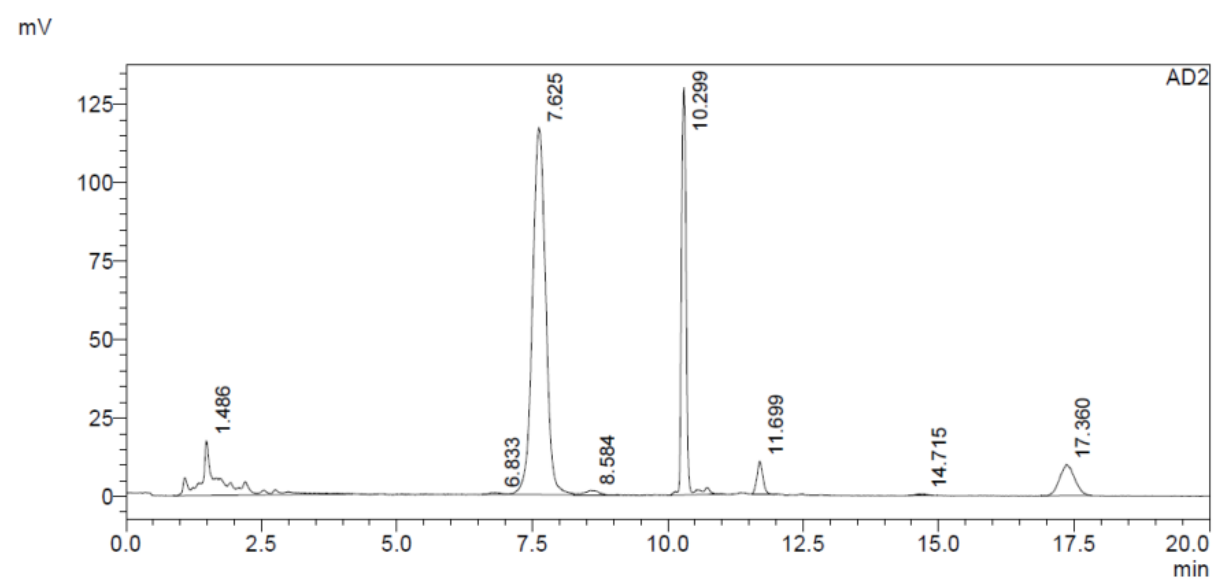

HPLC condition **D** (X = 30), injection volume 5  $\mu$ L, product peak at 7.625 min (gamma),

Radiochemical Conversion (non-decay corrected): **57%**.

**Automation Isolated Sample (*without internal standard*)**

**UV Trace**

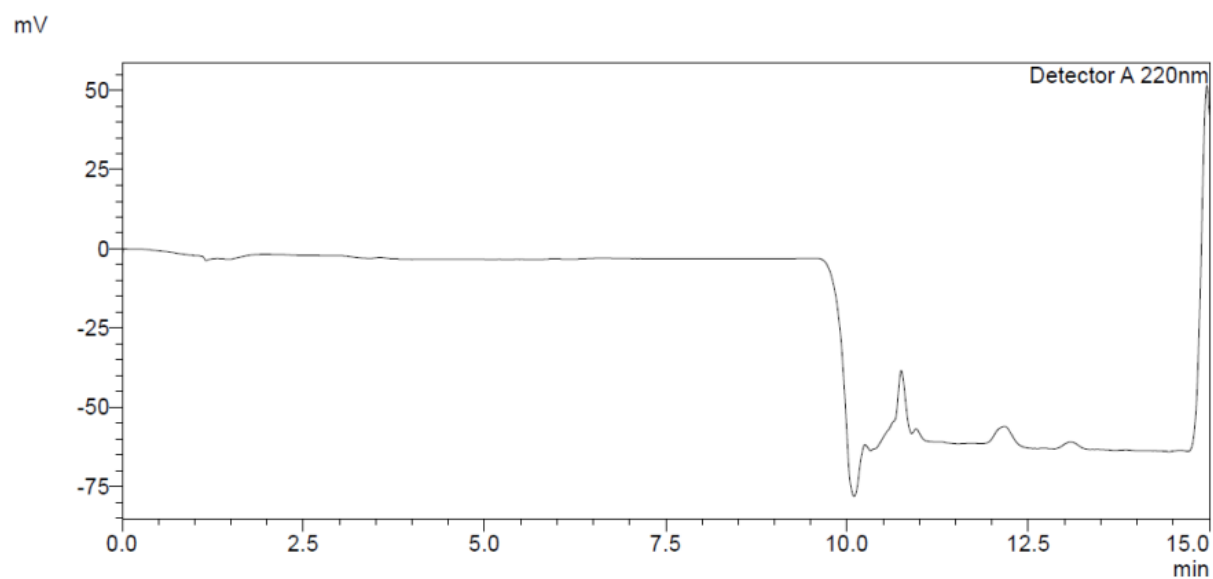

**Gamma Trace**

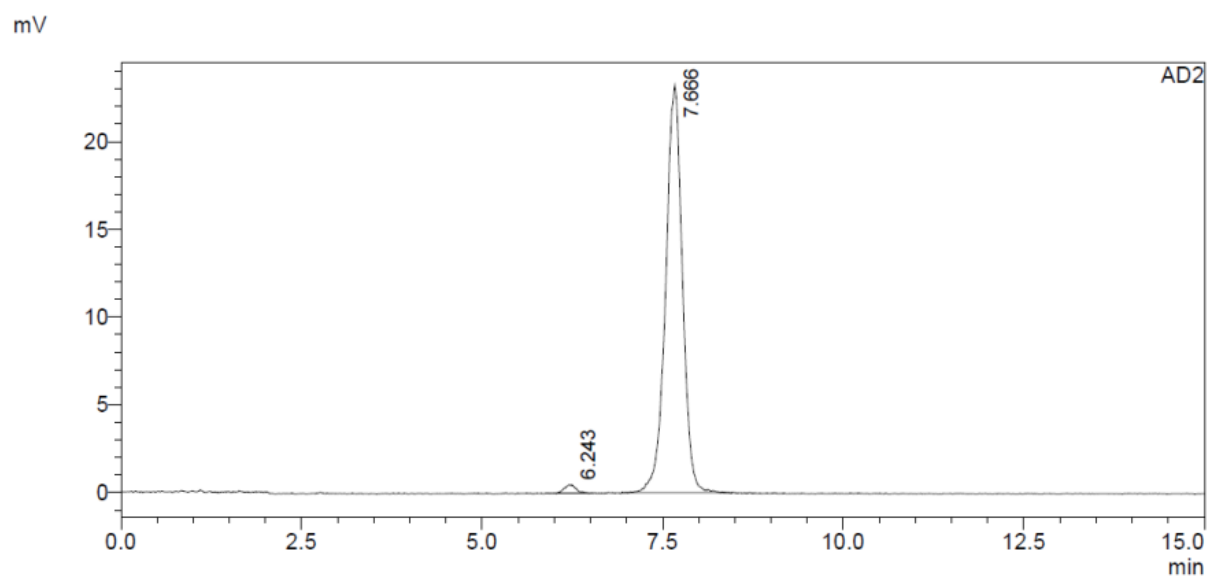

HPLC condition **A** (X = 30), injection volume 10  $\mu$ L, peak at 7.666 min (gamma)

Radiochemical Purity: **99%**.

## Automation Isolated Sample (with internal standard)

### UV detector

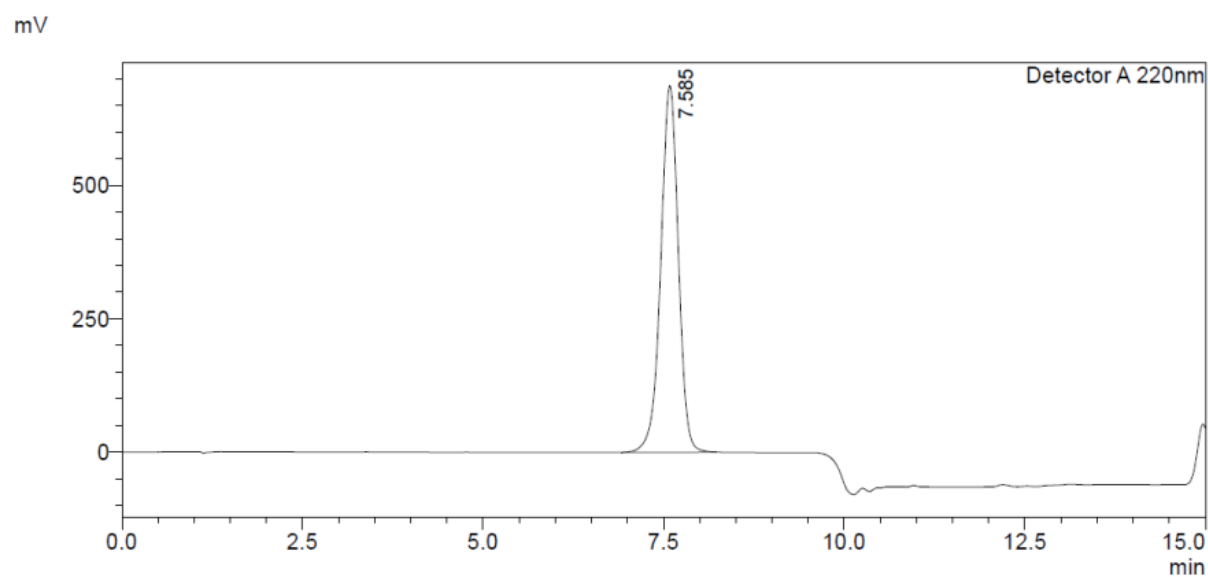

### Gamma Trace

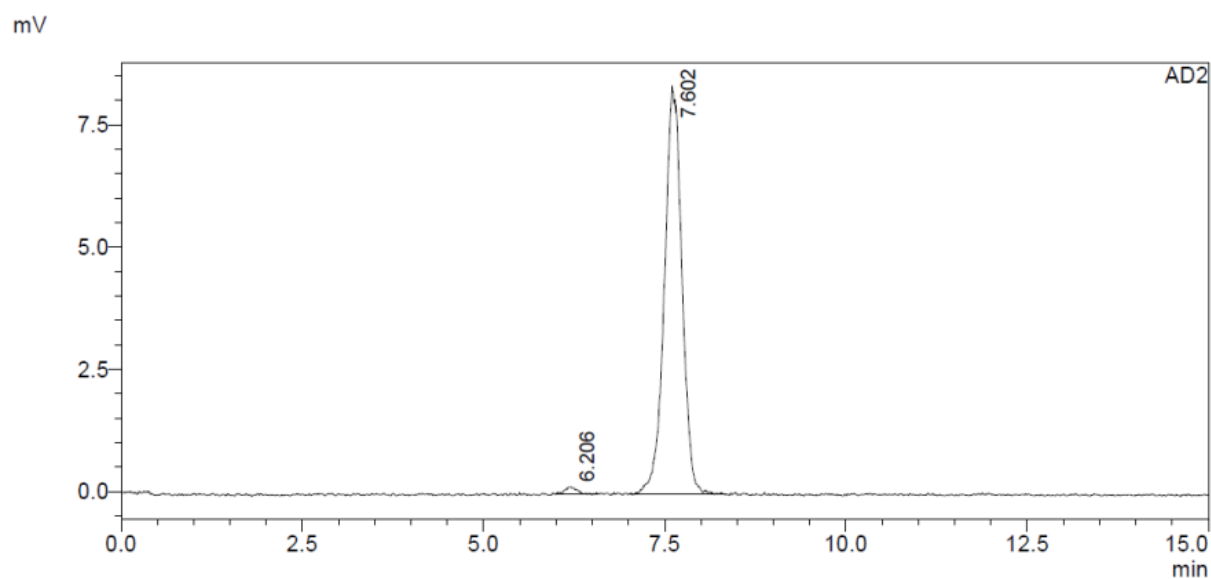

HPLC condition **A** (X = 30), injection volume 10  $\mu$ L, peak at 7.585 min (UV) and 7.602 min (gamma),  
Radiochemical Purity: **99%**.



## Automation GE TRACERlab FX2<sub>M</sub> Timelist and Configuration

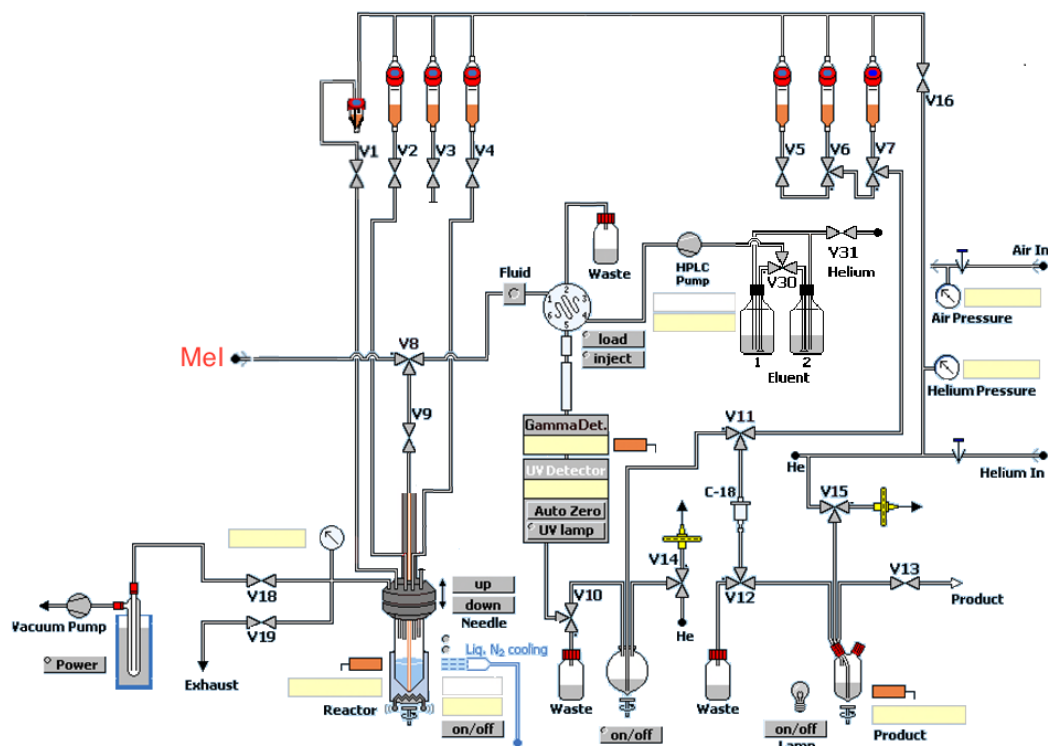

### Time List: Methylation start up J

2/11/2025

| Time   | Device                       | Value                   | Dur. | Comme                 |
|--------|------------------------------|-------------------------|------|-----------------------|
| 0      | Set Power                    | = On                    |      |                       |
| 0.1    | Set HPLC Pump Flow Set Point | = 0                     |      |                       |
| 0.3    | Set V19                      | = Open                  |      |                       |
| 0.4    | Set Process Control          | = Show message and wait |      | Waiting for precursor |
| t1+0   | Set Needle Reactor 1         | = Down                  |      |                       |
| t1+0.1 | Set V19                      | = Close                 |      |                       |

### Time List: Methylation heat

2/11/2025

| Time    | Device                              | Value                   | Dur. | Comme            |
|---------|-------------------------------------|-------------------------|------|------------------|
| 0       | Set Power                           | = On                    |      |                  |
| 0.2     | Set Stirrer                         | = On                    |      |                  |
| 0.4     | Set Process Control                 | = Show message and wait |      | waiting activity |
| t1+0    | Set V09                             | = Open                  |      |                  |
| t1+0.1  | Set V19                             | = Open                  |      |                  |
| t1+3'40 | Set Needle Reactor 1                | = Up                    |      |                  |
| t1+3'40 | Set V09                             | = Close                 |      |                  |
| t1+3'41 | Set V19                             | = Close                 |      |                  |
| t1+3'42 | Set V08                             | = b (right)             |      |                  |
| t1+3'42 | Set Temp. Setpoint Reactor          | = 60                    |      |                  |
| t1+3'42 | Wait Temp. Regulator Status Reactor | = Temp. OK              |      |                  |
| t2+5'2  | Set Temp. Setpoint Reactor          | = 40                    |      |                  |
| t2+5'2  | Wait Temp. Regulator Status Reactor | = Temp. OK              |      |                  |
| t3+0    | Set V19                             | = Open                  |      |                  |
| t3+0.1  | Set V01 Vial1                       | = Open                  |      |                  |
| t3+0.2  | Set V16                             | = Open                  |      |                  |
| t3+20.3 | Set V01 Vial1                       | = Close                 |      |                  |
| t3+20.4 | Set V16                             | = Close                 |      |                  |
| t3+35   | Set V02 Vial2                       | = Open                  |      |                  |
| t3+35.1 | Set V16                             | = Open                  |      |                  |
| t3+55   | Set V02 Vial2                       | = Close                 |      |                  |
| t3+55.1 | Set V16                             | = Close                 |      |                  |
| t3+55.2 | Set V19                             | = Close                 |      |                  |
| t3+55.4 | Set Temp. Setpoint Reactor          | = 75                    |      |                  |
| t3+55.5 | Wait Temp. Regulator Status Reactor | = Temp. OK              |      |                  |
| t4+5'0  | Set Temp. Setpoint Reactor          | = 30                    |      |                  |
| t4+5'1  | Wait Temp. Regulator Status Reactor | = Temp. OK              |      |                  |
| t5+0    | Set V19                             | = Open                  |      |                  |

**Time List:** HPLC reactor

2/11/2025

| Time    | Device                            | Value           | Dur. | Comme                     |
|---------|-----------------------------------|-----------------|------|---------------------------|
| 0.1     | Set HPLC Pump Flow Set Point      | = 6             |      |                           |
| 0.2     | Set V04 Vial4                     | = Open          |      | Dilution with HPLC eluent |
| 0.3     | Set V16                           | = Open          |      |                           |
| 30      | Set V04 Vial4                     | = Close         |      |                           |
| 30.1    | Set V16                           | = Close         |      |                           |
| 1'31    | Set V04 Vial4                     | = Open          |      |                           |
| 1'31    | Set V16                           | = Open          |      |                           |
| 1'32    | Set V09                           | = Open          |      |                           |
| 1'32    | Set V19                           | = Close         |      |                           |
| 1'33    | Set Needle Reactor 1              | = Down          |      | Transfer into HPLC loop   |
| 1'33    | Set HPLC UV Detector Auto Zero    | = On            |      |                           |
| 1'33    | Set HPLC UV Detector Auto Zero    | = Off           |      |                           |
| 1'34    | Wait Fluid Detector               | = ON            |      |                           |
| t1+2    | Wait Fluid Detector               | = Off           |      |                           |
| t2+0.1  | Set Load/Inject Valve             | = Inject        |      |                           |
| t2+20.3 | Set V04 Vial4                     | = Close         |      |                           |
| t2+20.4 | Set V16                           | = Close         |      |                           |
| t2+20.5 | Set Needle Reactor 1              | = Up            |      |                           |
| t2+30   | Wait Chromatography Peak Detector | = Start of Peak |      | Peak Cut                  |
| t3+20   | Wait Chromatography Peak Detector | = End of Peak   |      |                           |
| t4+20.1 | Set Load/Inject Valve             | = Load          |      |                           |

## Analytical Data for Manual Substrates

**4a**

(Base = 2 eq. K<sup>+</sup>OTf)

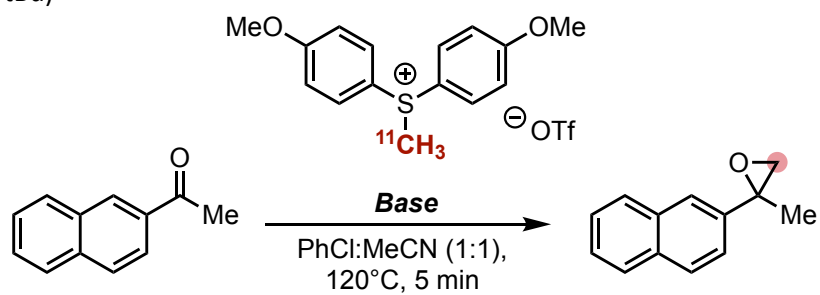

Standard - UV Detector

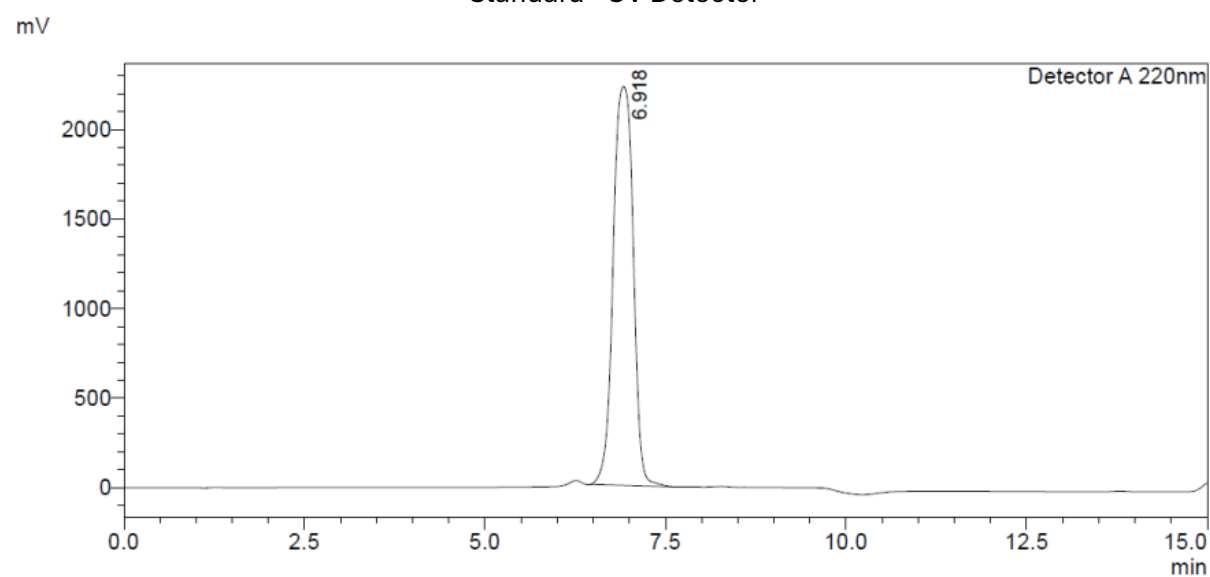

Crude Reaction Mixture (without internal standard) – UV Detector

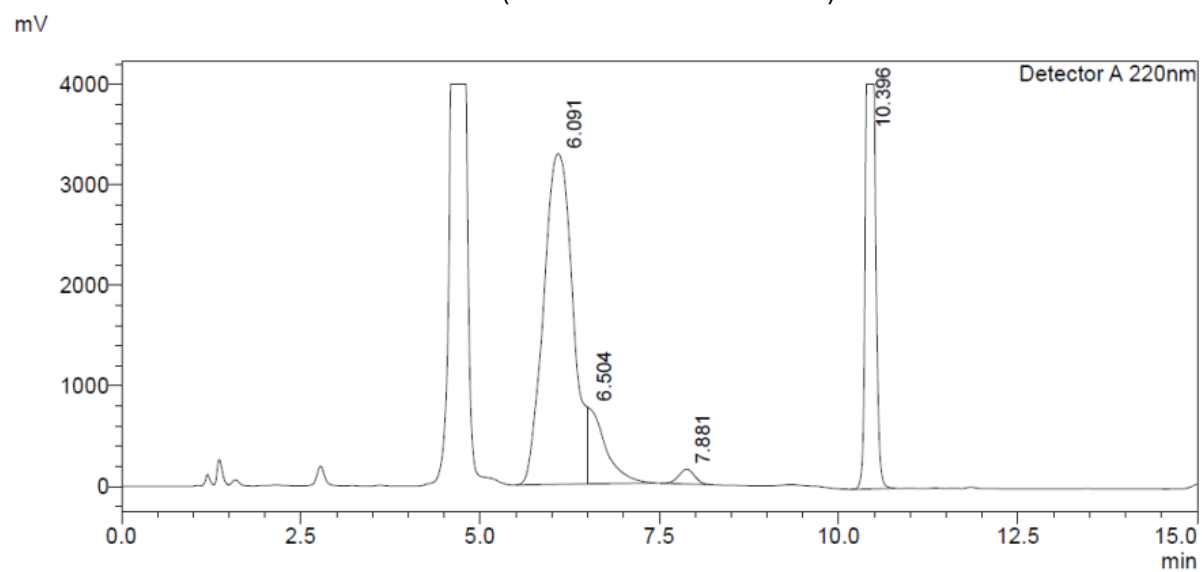

Crude Reaction Mixture – Gamma Detector

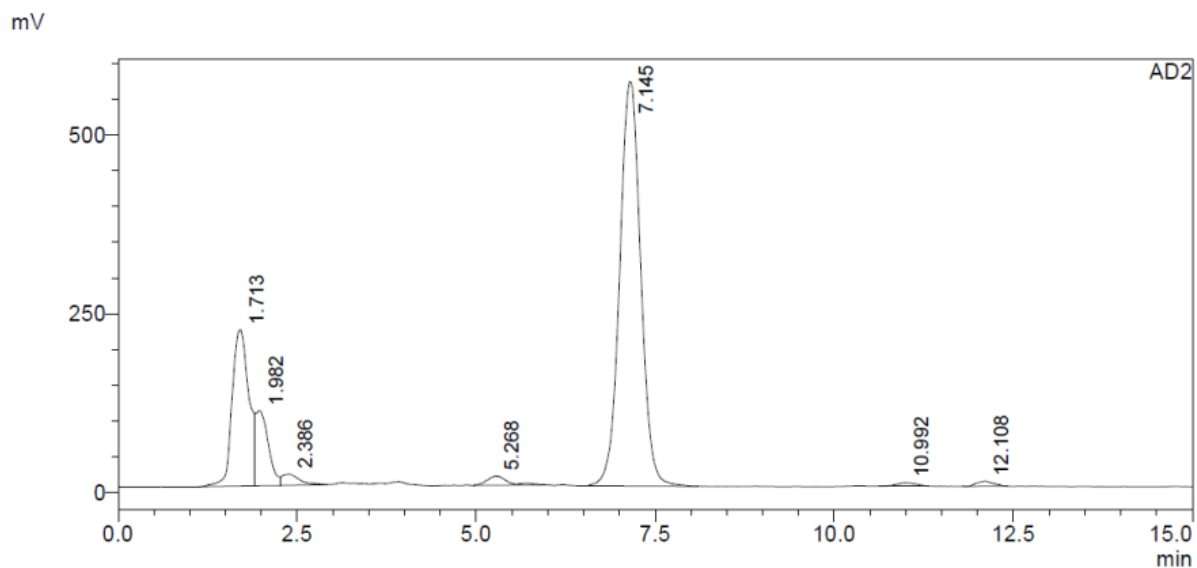

Crude Reaction Mixture (with internal standard) – UV Detector

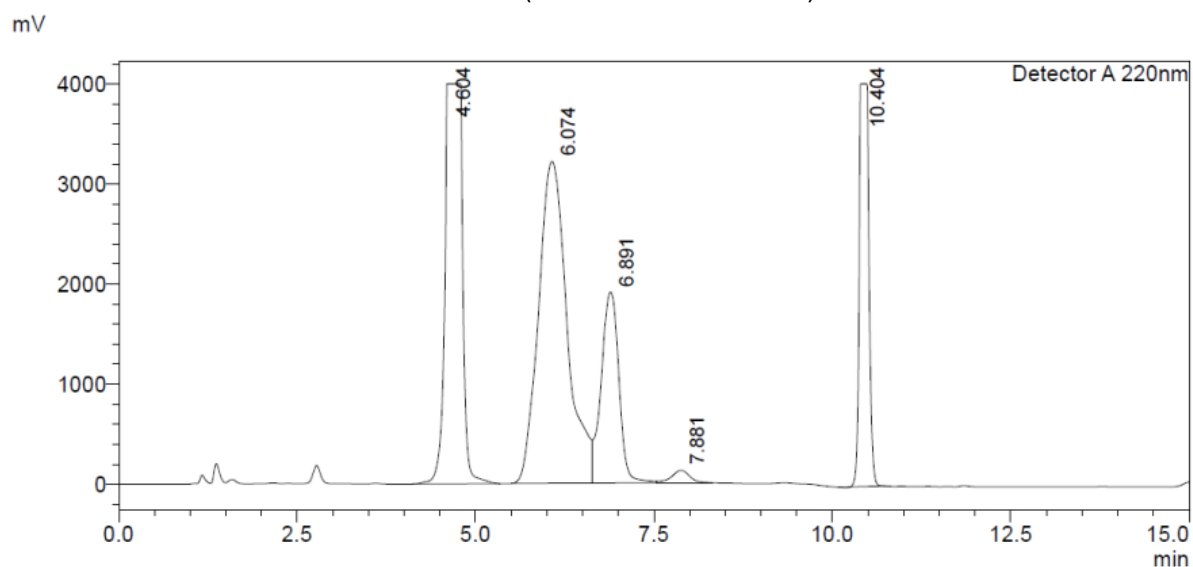

Crude Reaction Mixture – Gamma Detector

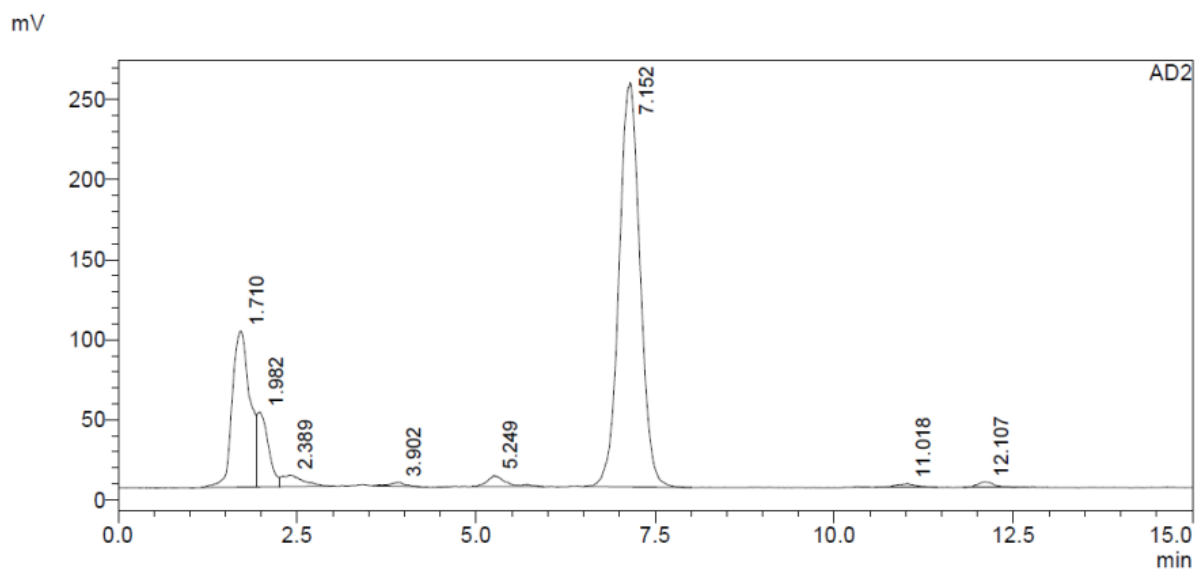

HPLC condition **A (X = 50)**, injection volume 5  $\mu$ L, peak at 6.891 (UV) and 7.152 (Rad), RCY **67%**.

**4b**

(Base = 1eq. <sup>t</sup>BuOK)

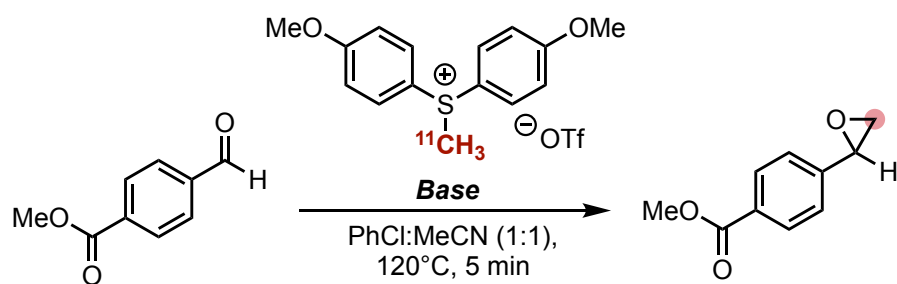

Standard - UV Detector

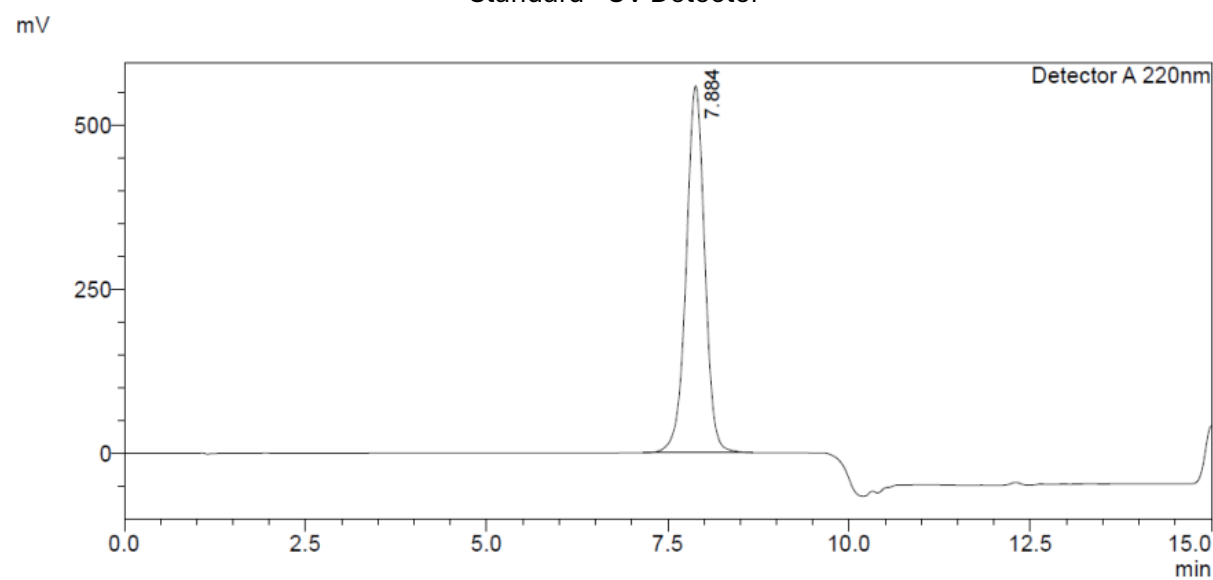

Crude Reaction Mixture (without internal standard) – UV Detector

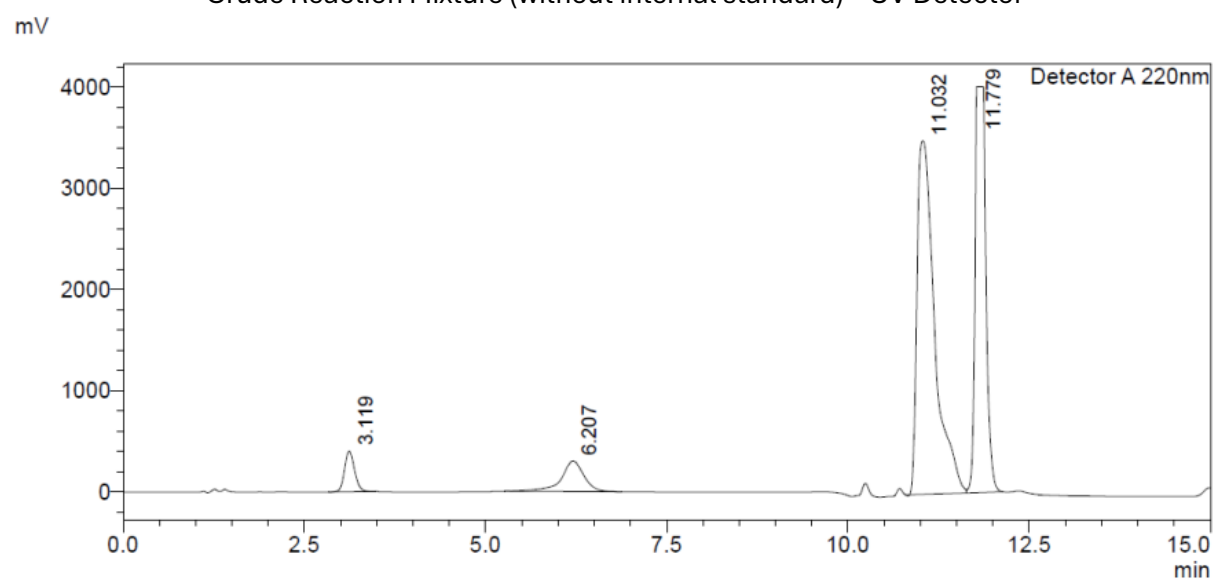

Crude Reaction Mixture – Gamma Detector

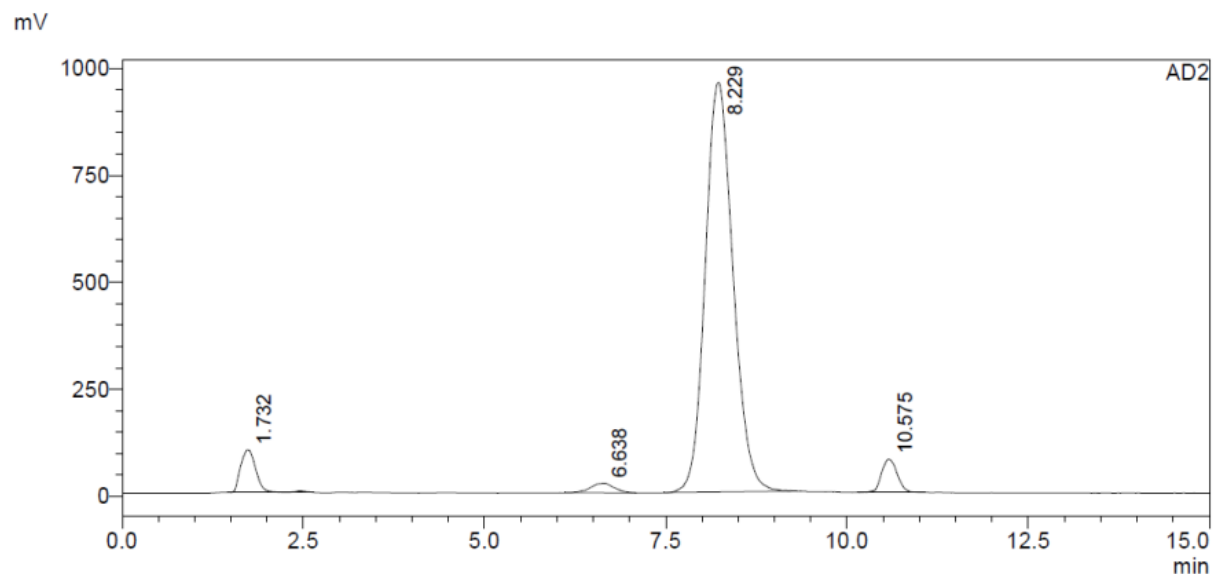

Crude Reaction Mixture (with internal standard) – UV Detector

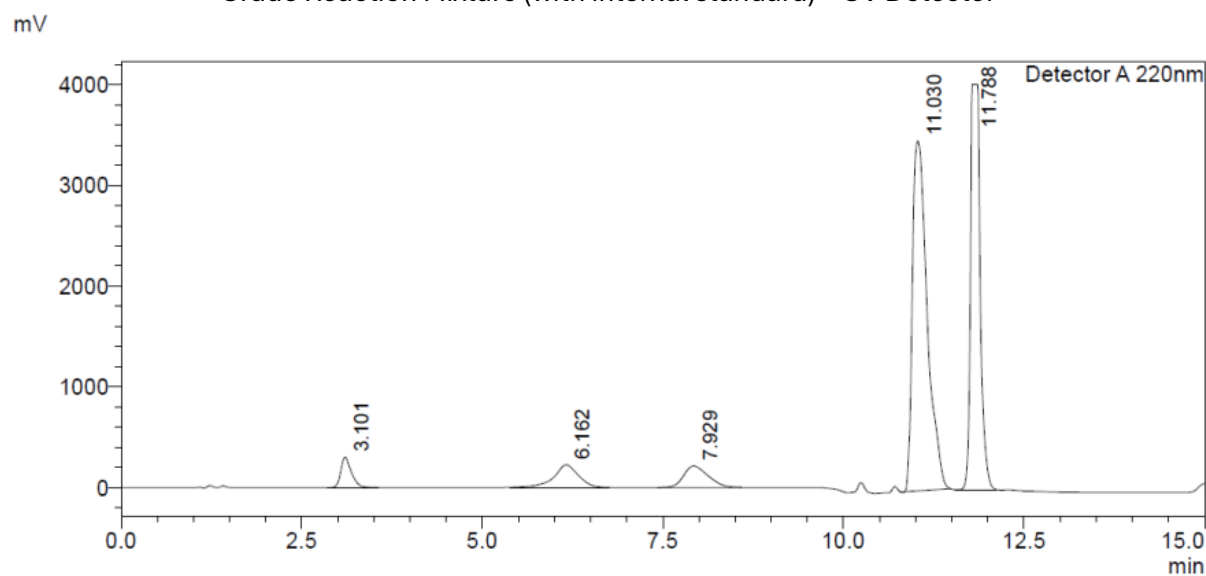

Crude Reaction Mixture – Gamma Detector

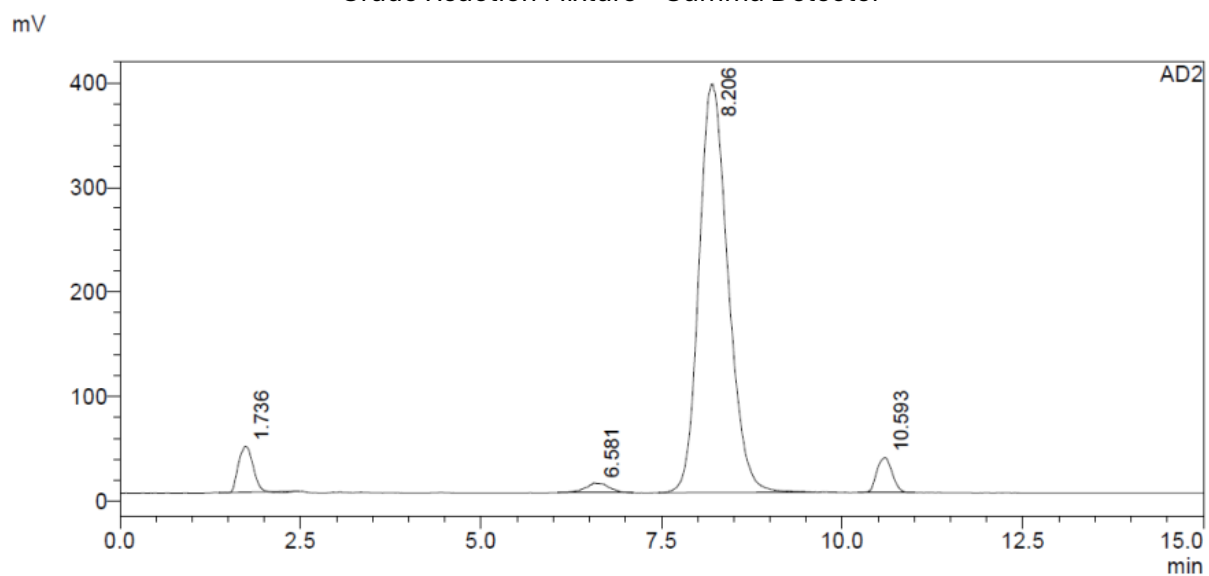

HPLC condition **A (X = 30)**, injection volume 5  $\mu$ L, peak at 7.929 (UV) and 8.206 (Rad), RCY 89%.

**4c**

(Base = 1 eq. K<sup>+</sup>OT<sup>-</sup>Bu)

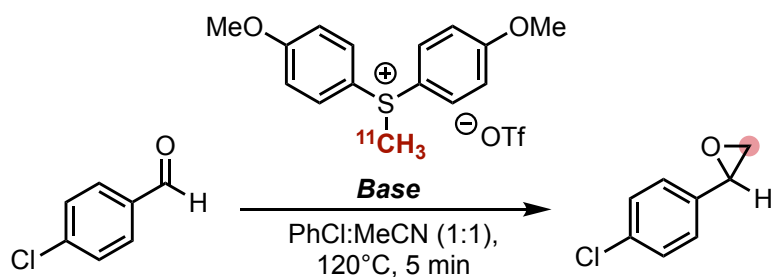

Standard - UV Detector

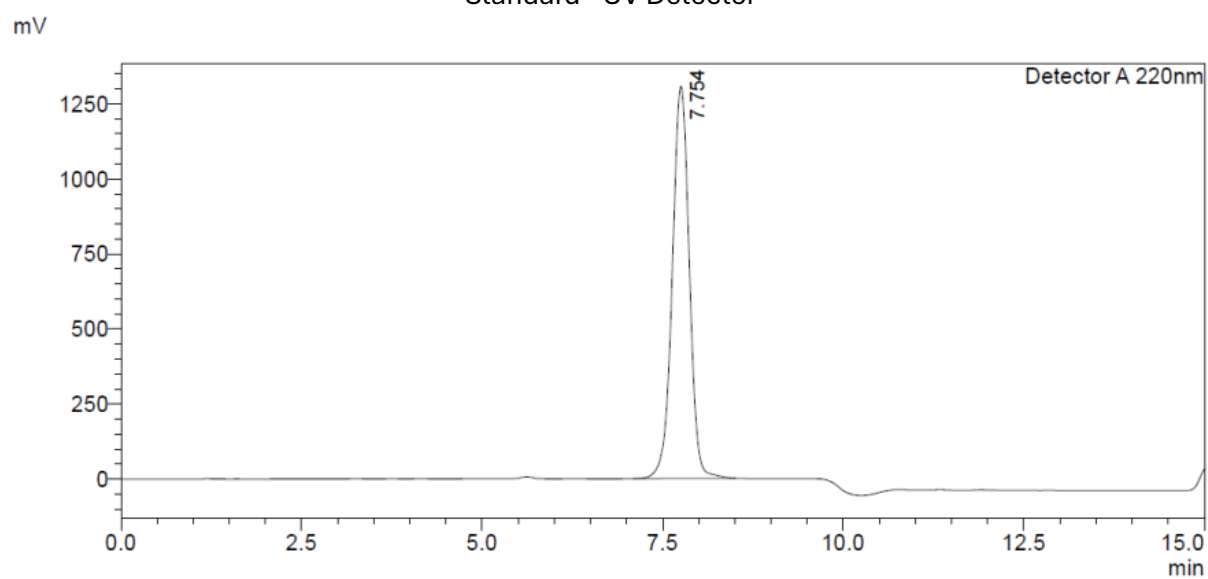

Crude Reaction Mixture (without internal standard) – UV Detector

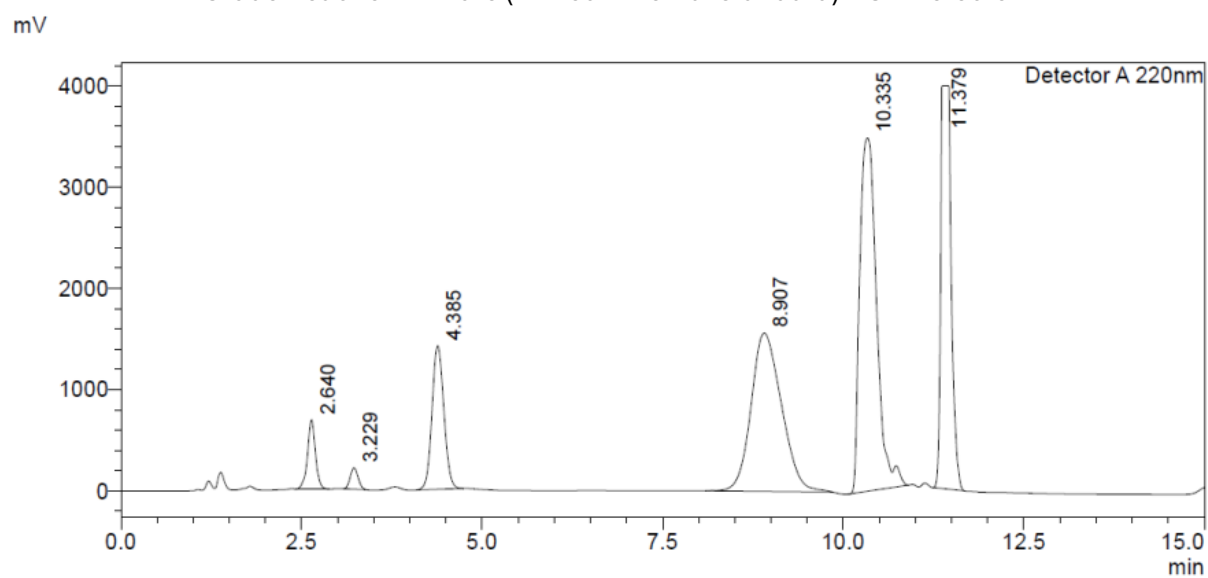

Crude Reaction Mixture – Gamma Detector

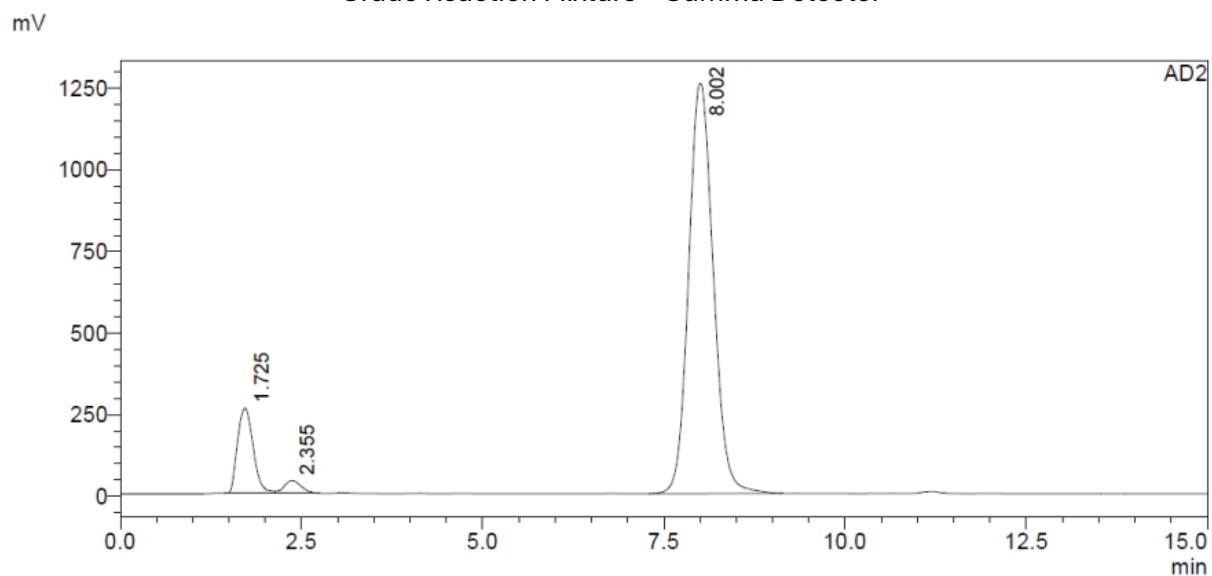

Crude Reaction Mixture (with internal standard) – UV Detector

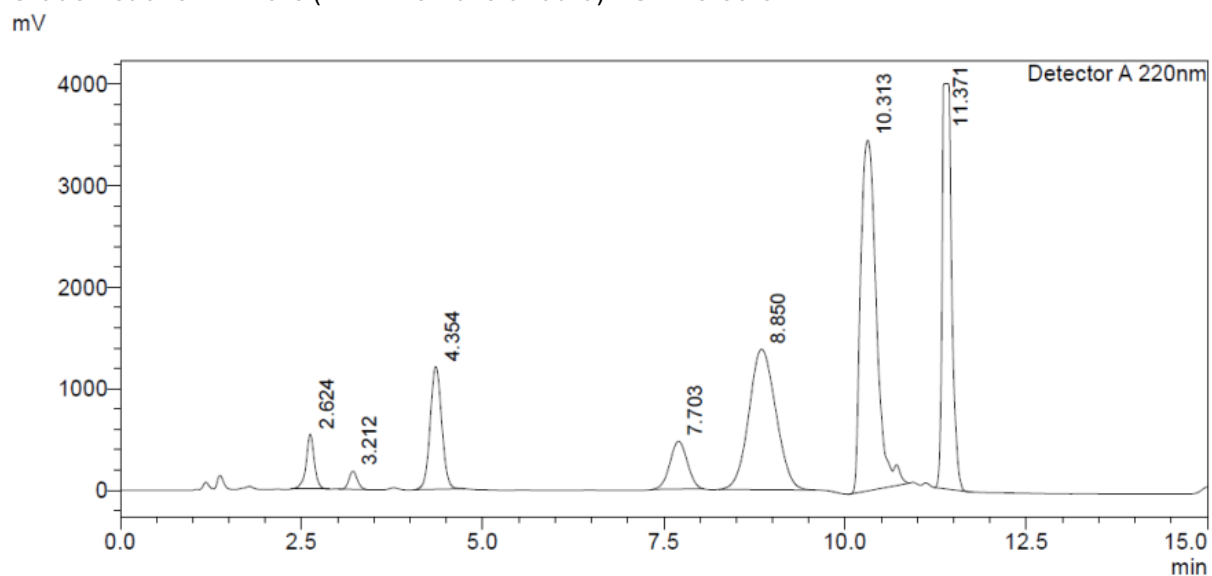

Crude Reaction Mixture – Gamma Detector

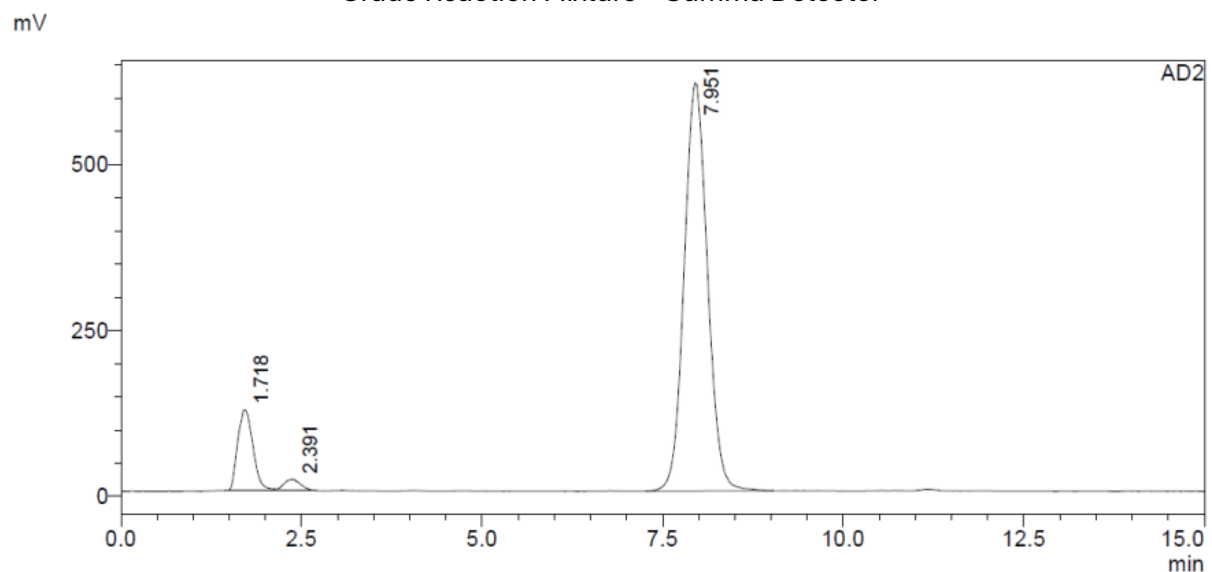

HPLC condition **A (X = 40)**, injection volume 5  $\mu$ L, peak at 7.703 (UV) and 7.951 (Rad), RCY **87%**.



**4e**

(Base = 1 eq. K<sup>+</sup>OTf)

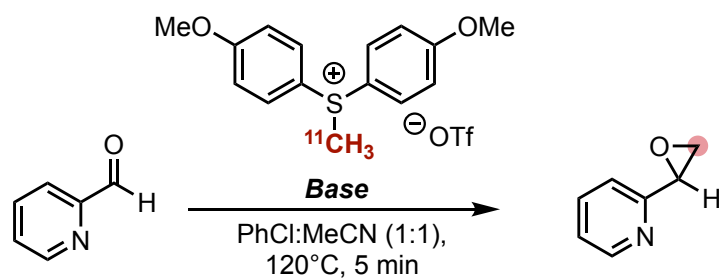

Standard - UV Detector

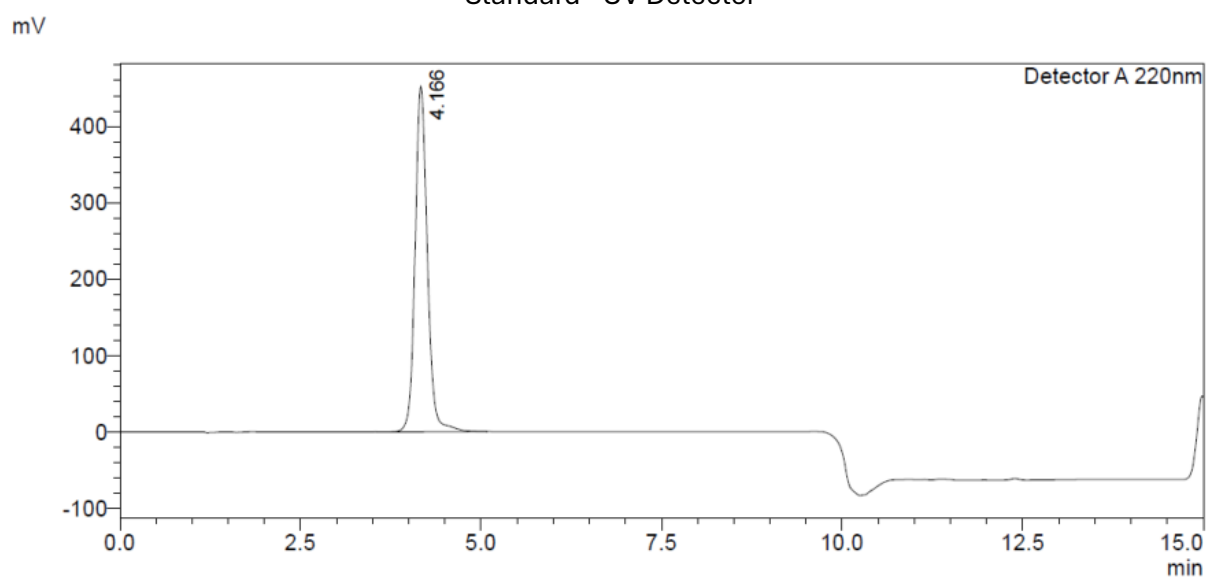

Crude Reaction Mixture (without internal standard) – UV Detector

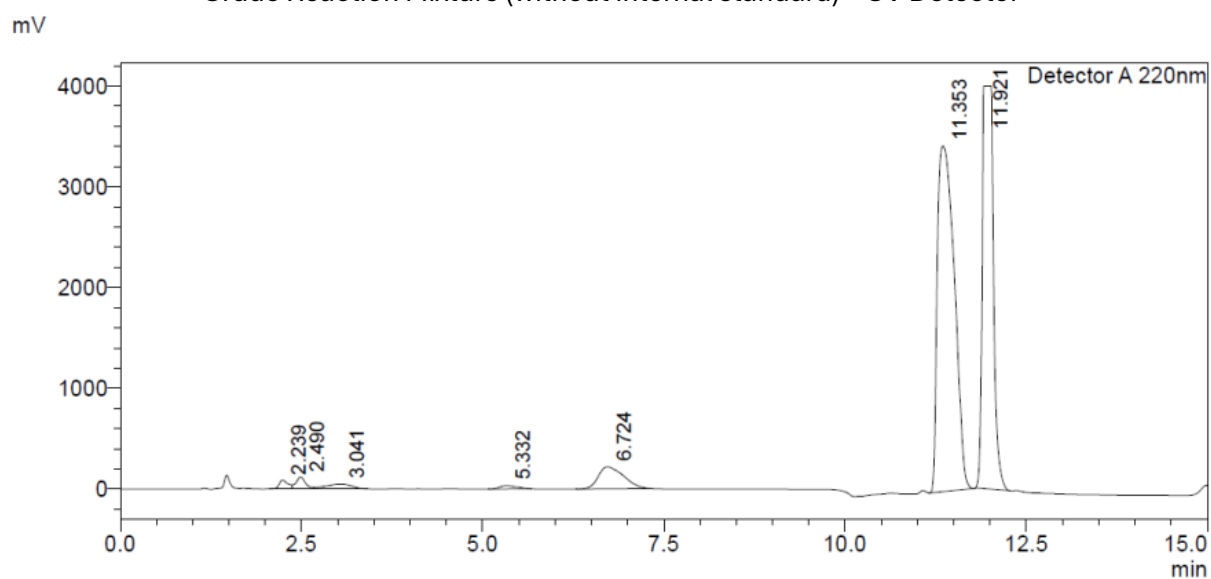

Crude Reaction Mixture – Gamma Detector

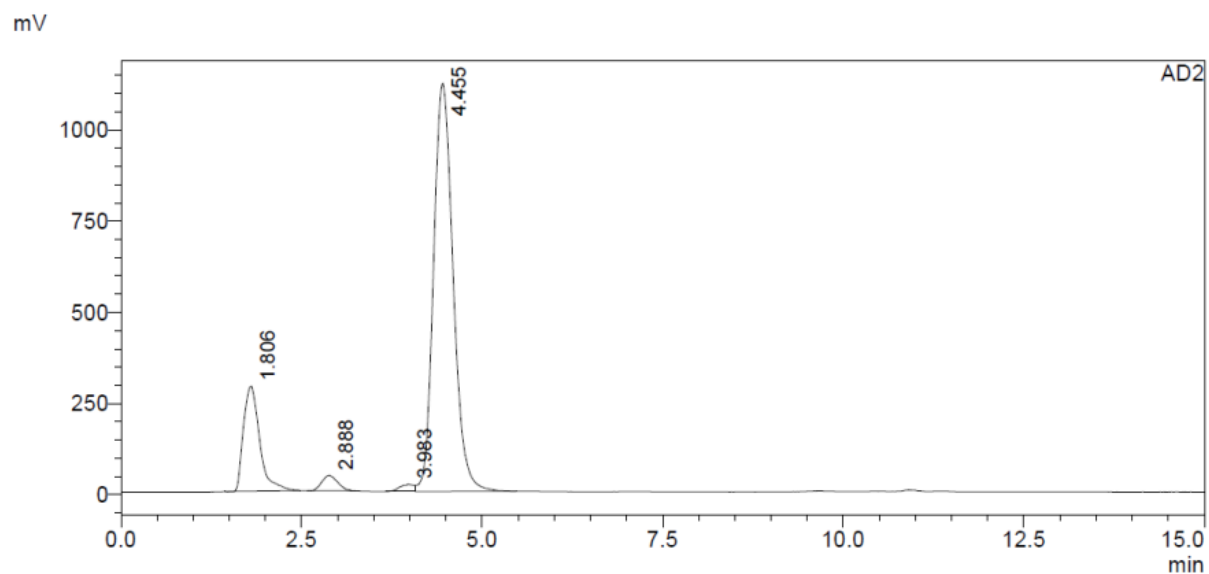

Crude Reaction Mixture (with internal standard) – UV Detector

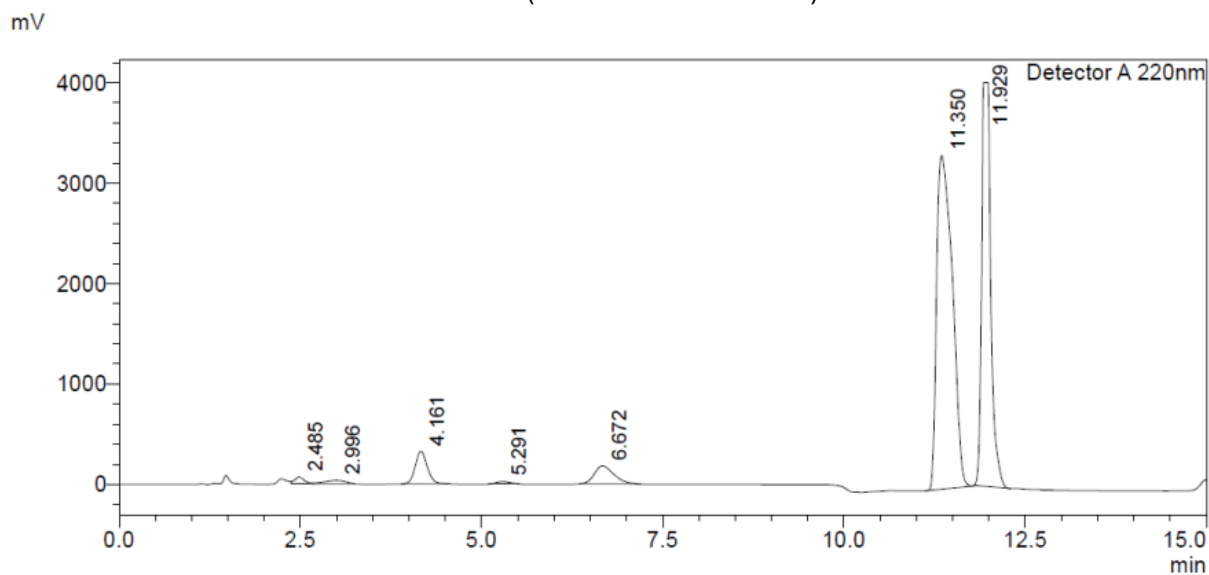

Crude Reaction Mixture – Gamma Detector

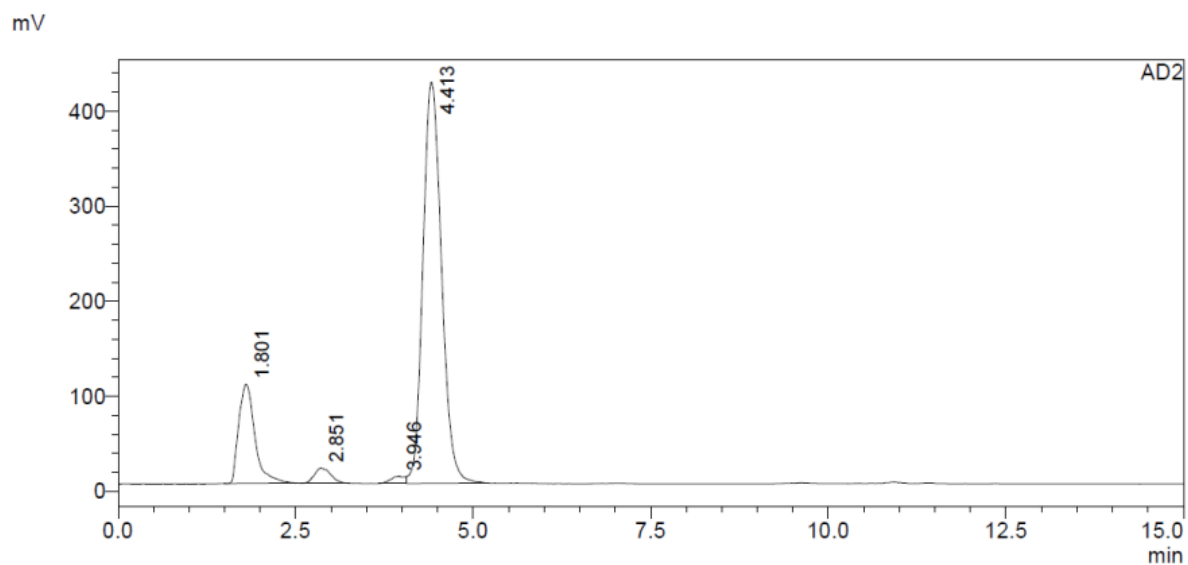

HPLC condition **A** (**X = 20**), injection volume 5  $\mu$ L, peak at 4.161 (UV) and 4.413 (Rad), RCY **80%**.

4f

(Base = 2 eq. K<sup>+</sup>OTf)

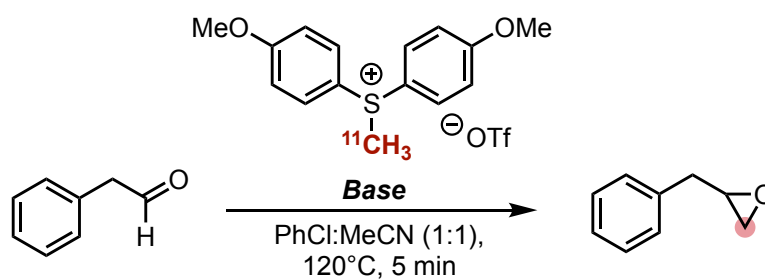

Standard - UV Detector

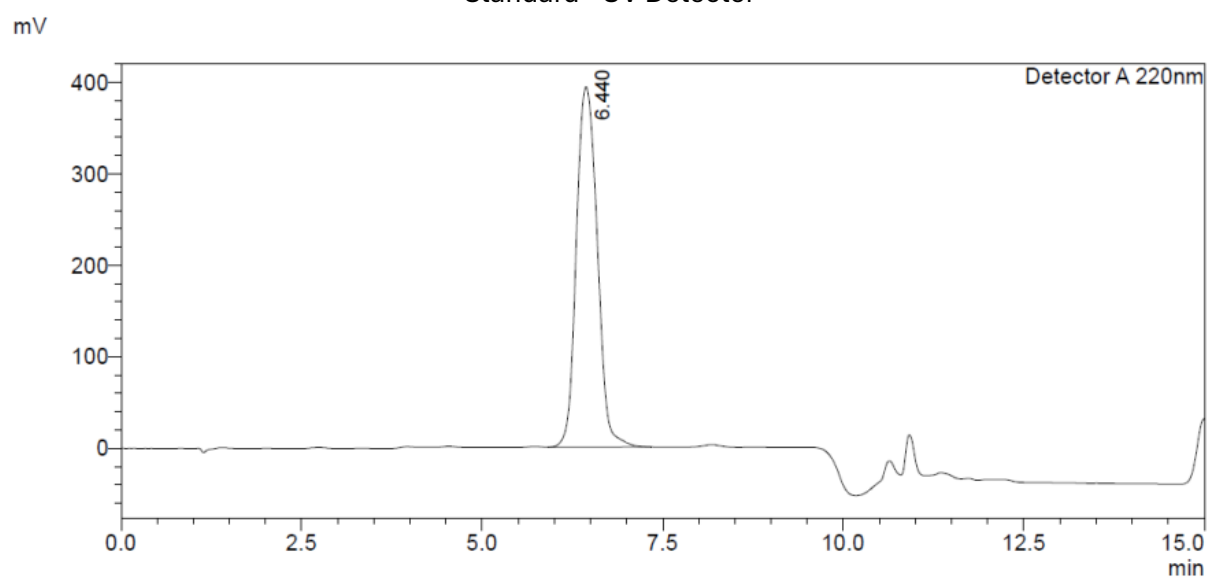

Crude Reaction Mixture (without internal standard) – UV Detector

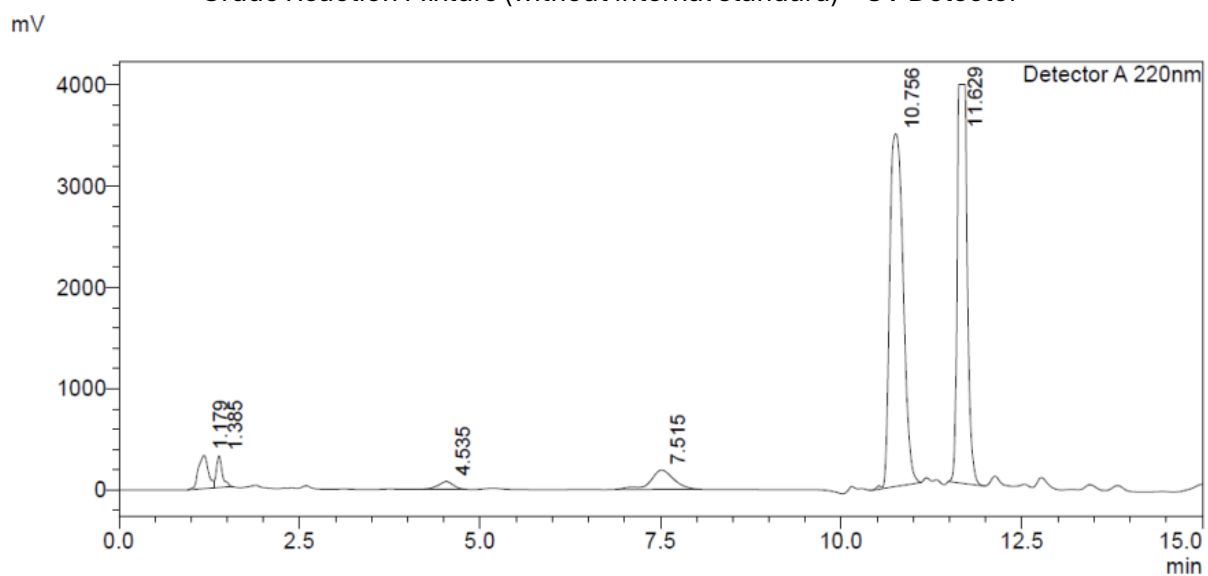

Crude Reaction Mixture – Gamma Detector

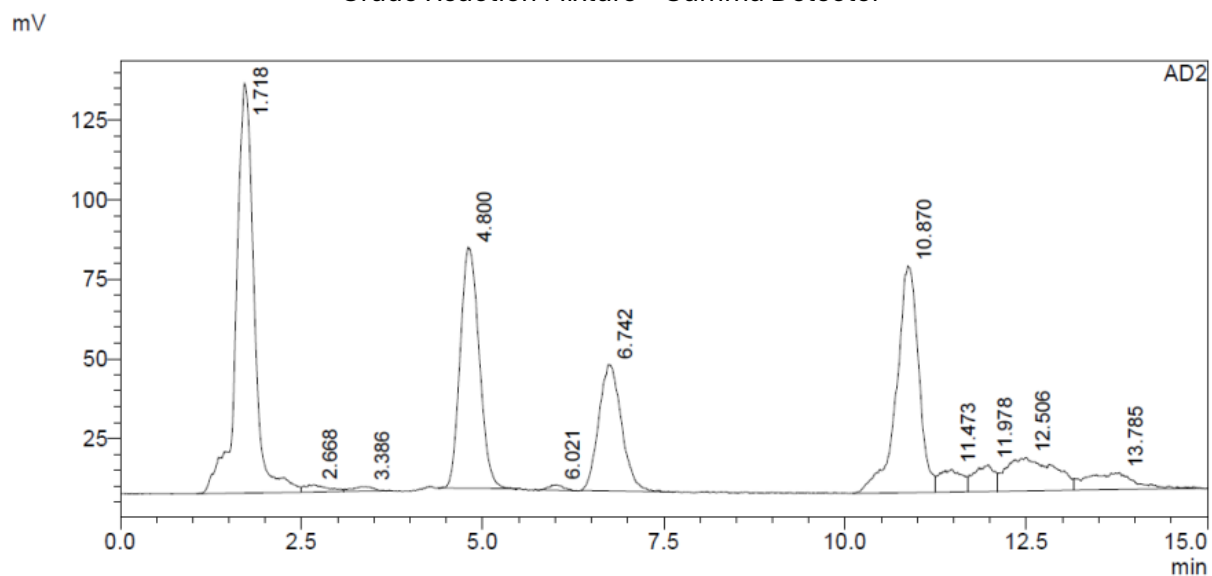

Crude Reaction Mixture (with internal standard) – UV Detector

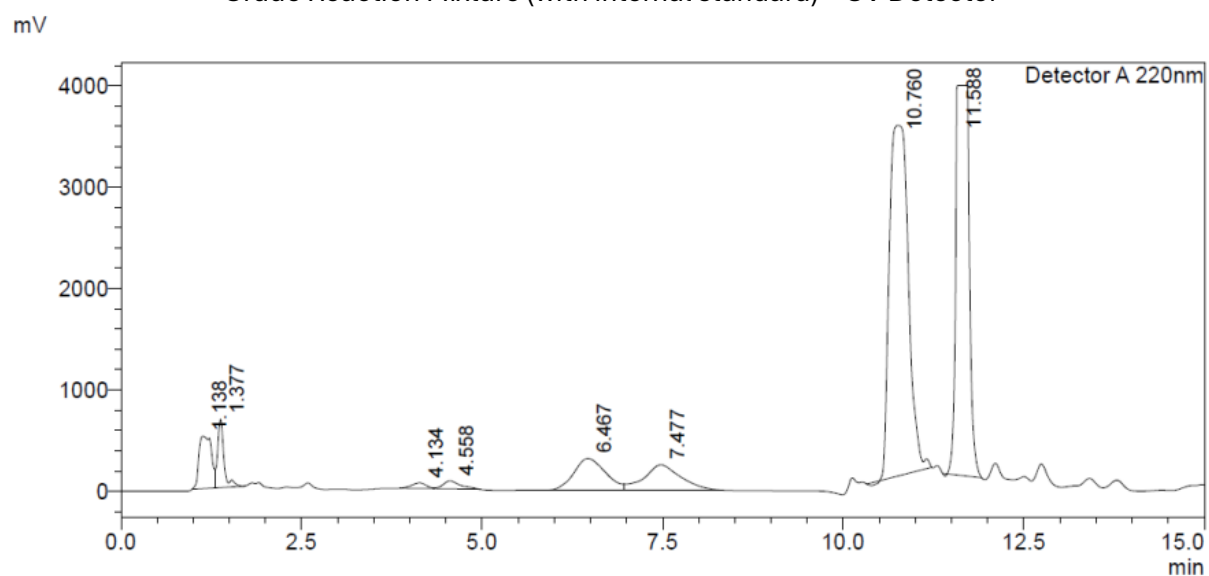

Crude Reaction Mixture – Gamma Detector

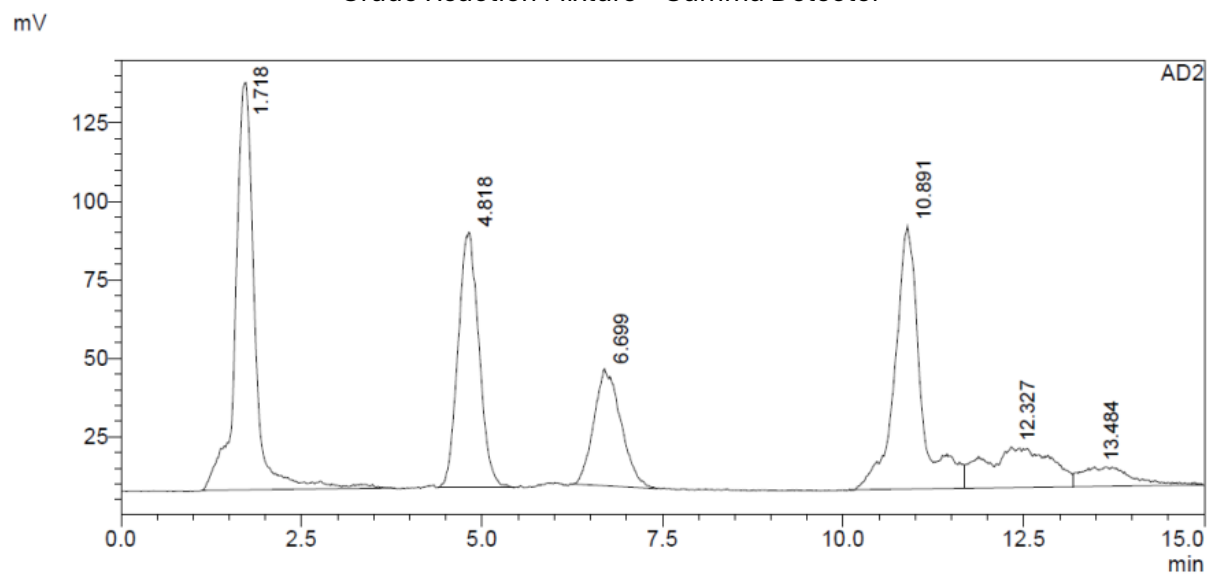

HPLC condition **A (X = 35)**, injection volume 5-10  $\mu$ L, peak at 6.467 (UV) and 6.699 (Rad), RCY **12%**.

**4g**

(Base = 2 eq. K<sup>+</sup>OT<sup>-</sup>Bu)

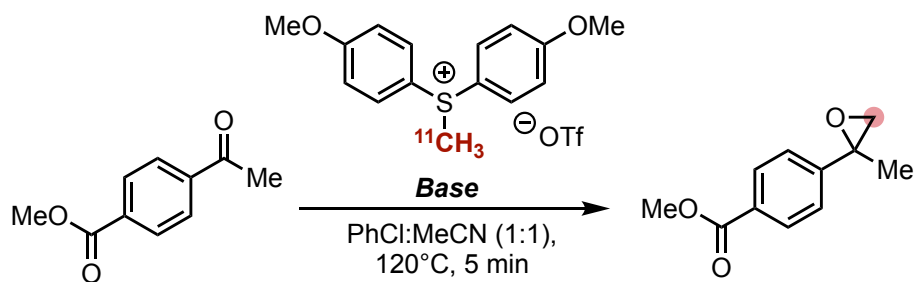

Standard - UV Detector

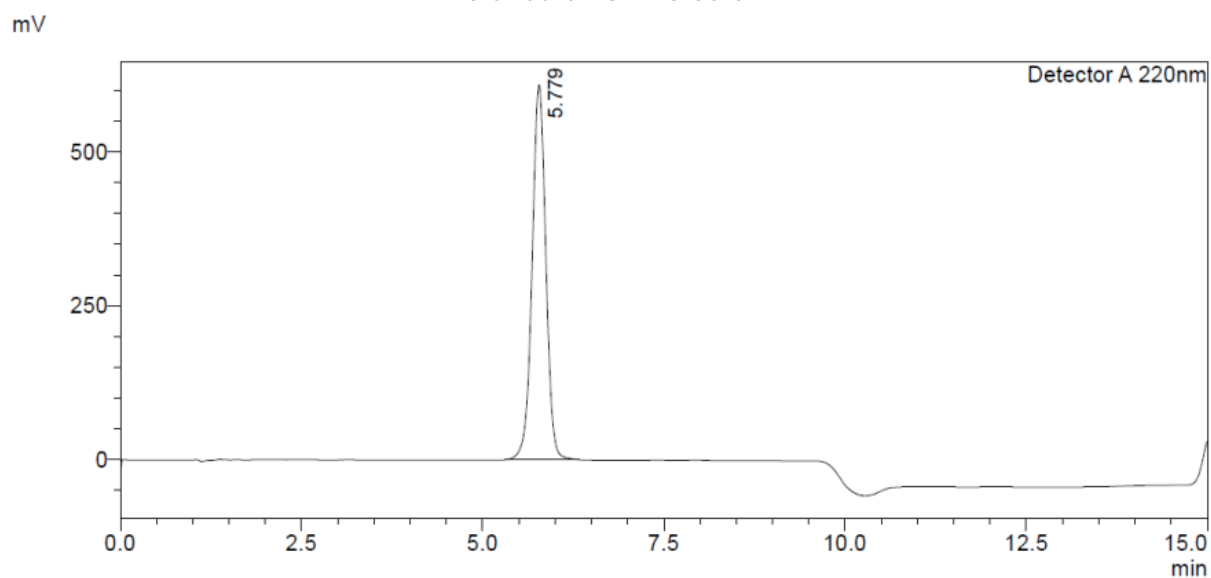

Crude Reaction Mixture (without internal standard) – UV Detector

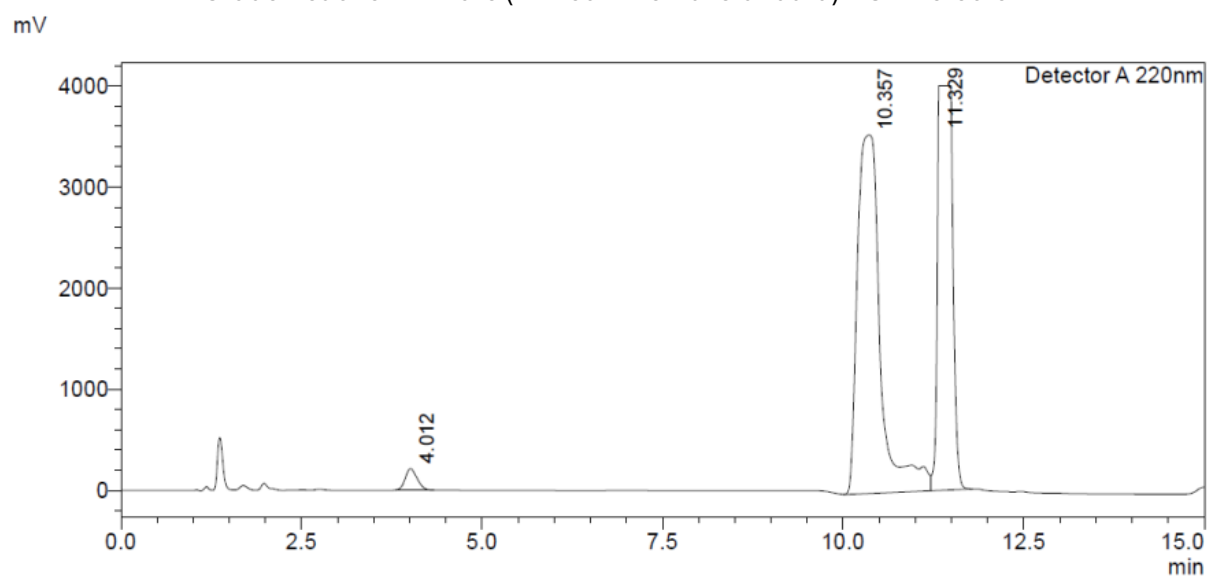

Crude Reaction Mixture – Gamma Detector

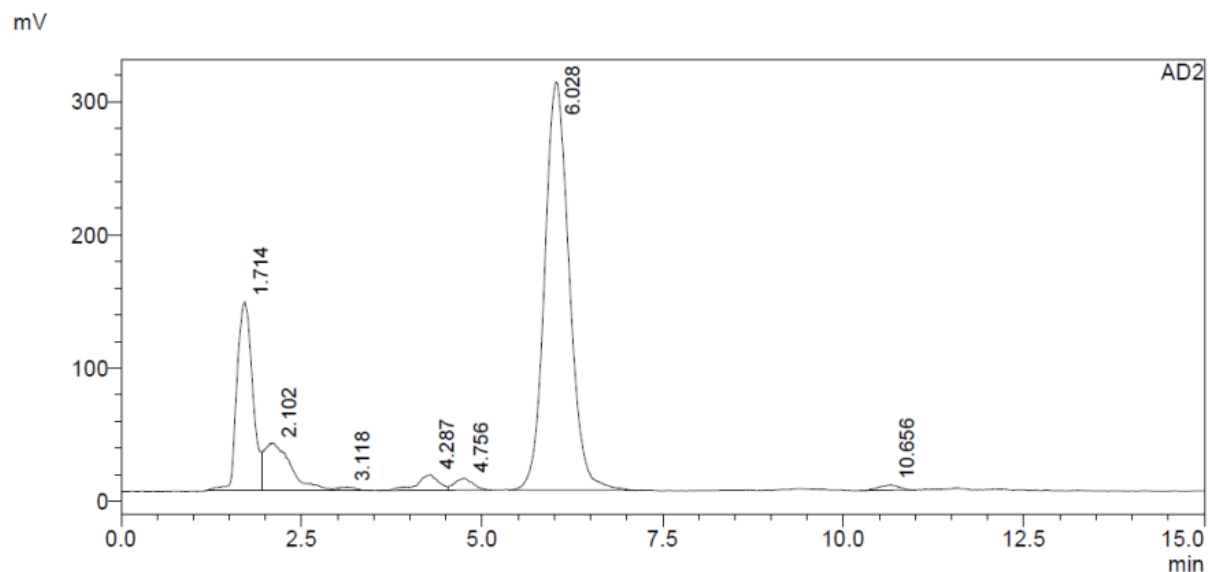

Crude Reaction Mixture (with internal standard) – UV Detector

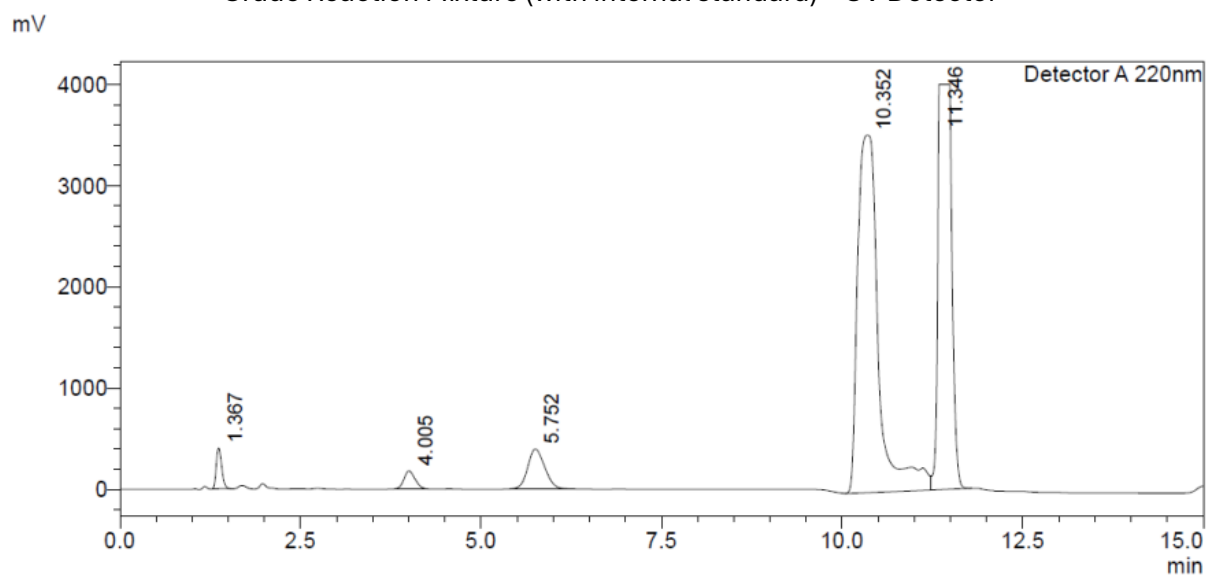

Crude Reaction Mixture – Gamma Detector

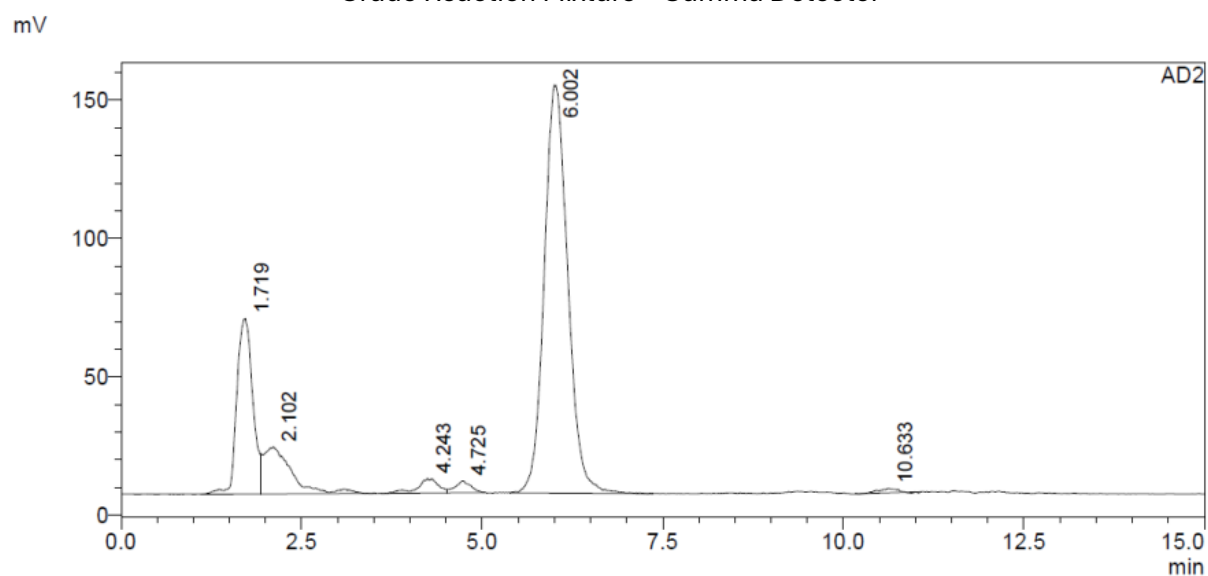

HPLC condition A (X = 40), injection volume 10  $\mu$ L, peak at 5.752 (UV) and 6.002 (Rad), RCY 67%.

**4h**

(Base = 2 eq. K<sup>+</sup>OTf)

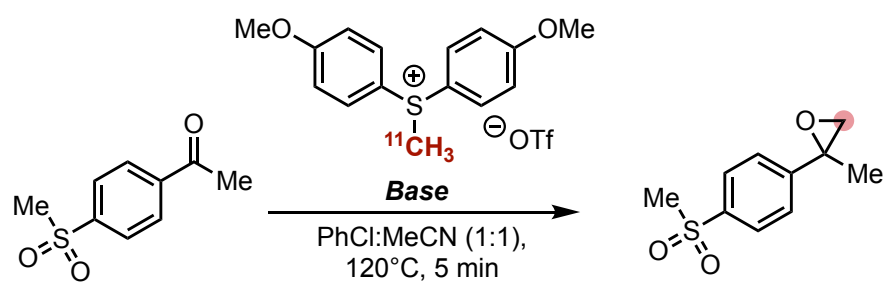

Standard - UV Detector

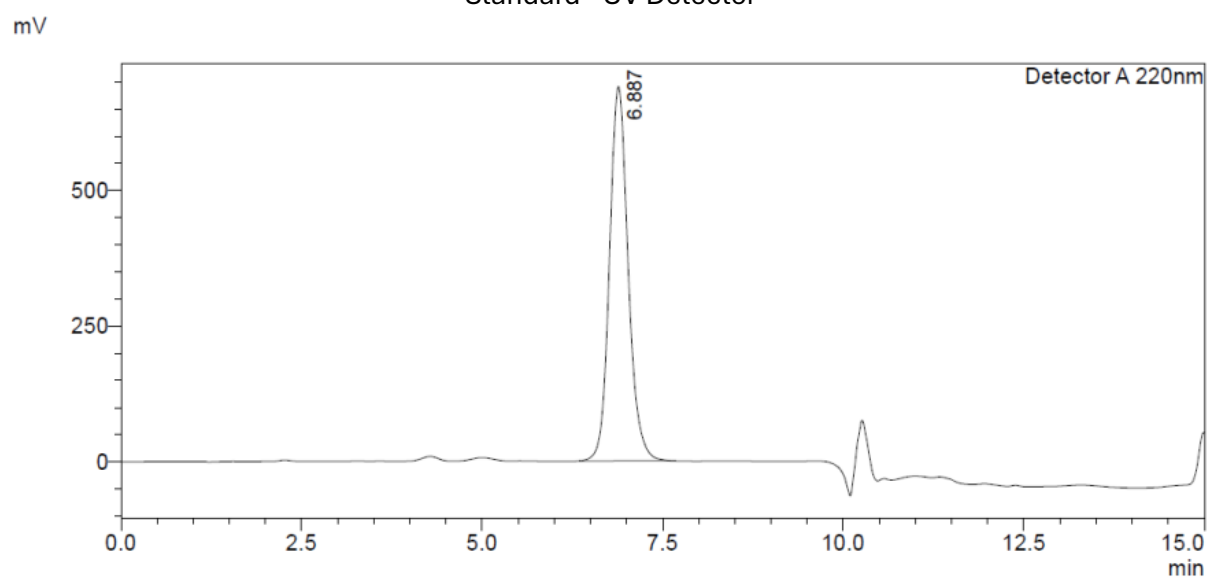

Crude Reaction Mixture (without internal standard) – UV Detector

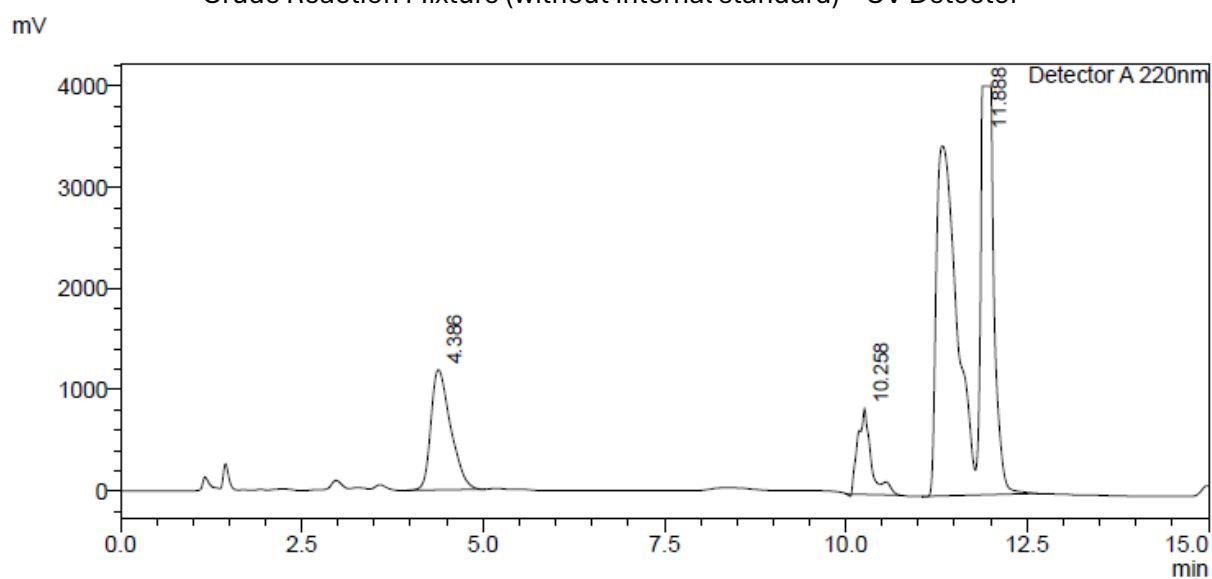

Crude Reaction Mixture – Gamma Detector

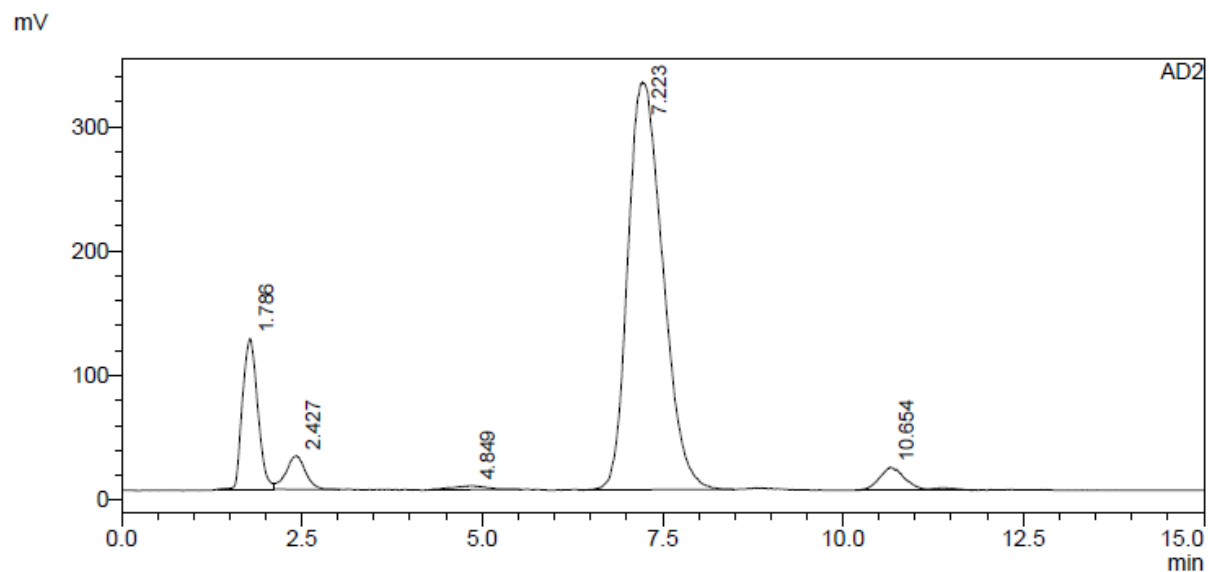

Crude Reaction Mixture (with internal standard) – UV Detector

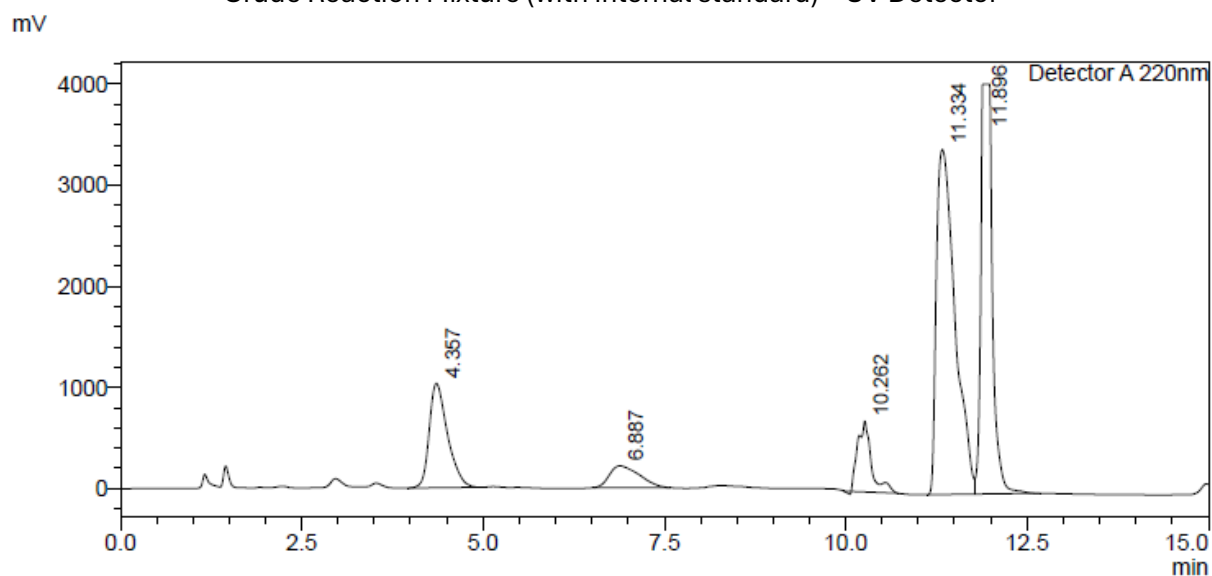

Crude Reaction Mixture – Gamma Detector

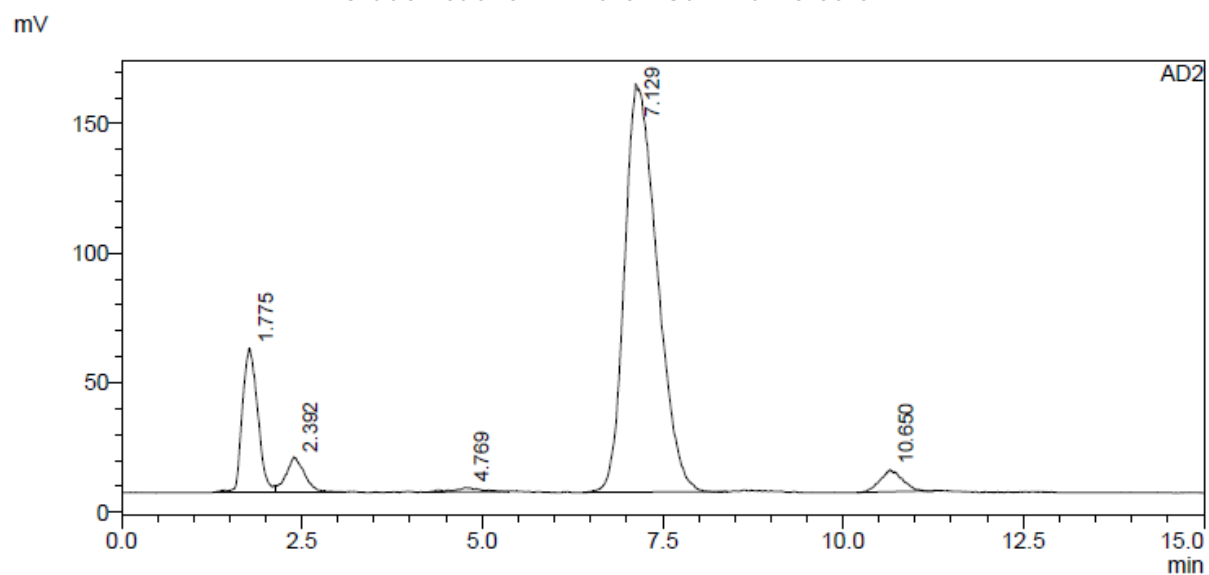

HPLC condition **A** (**X = 20**), injection volume 5  $\mu$ L, peak at 6.887 (UV) and 7.129 (Rad), RCY **79%**.



4i

(Base = 2eq. <sup>t</sup>BuOK)

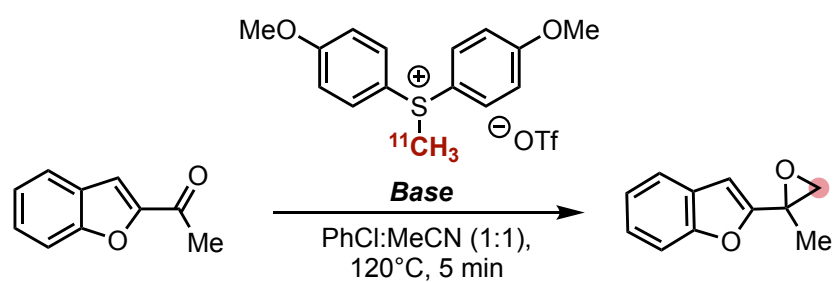

Standard - UV Detector

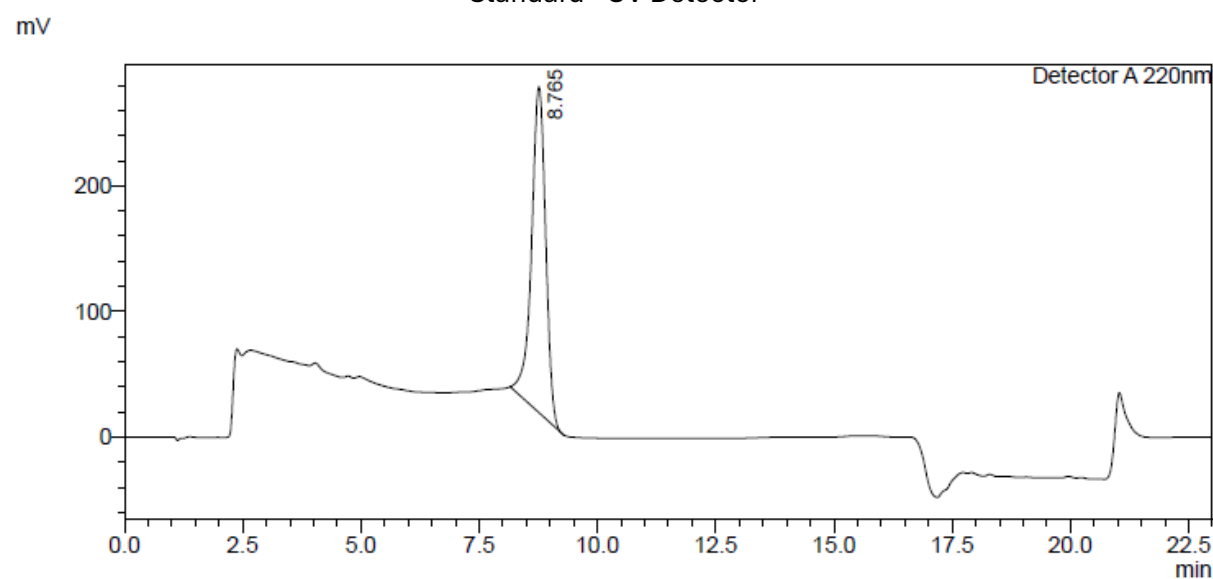

Crude Reaction Mixture (without internal standard) – UV Detector

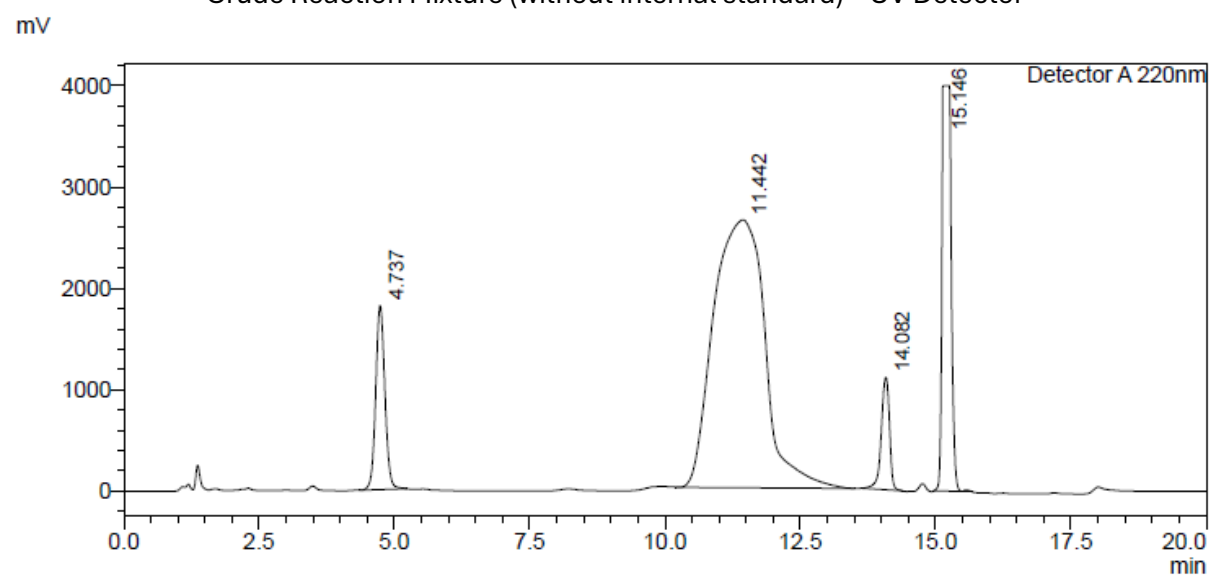

Crude Reaction Mixture – Gamma Detector

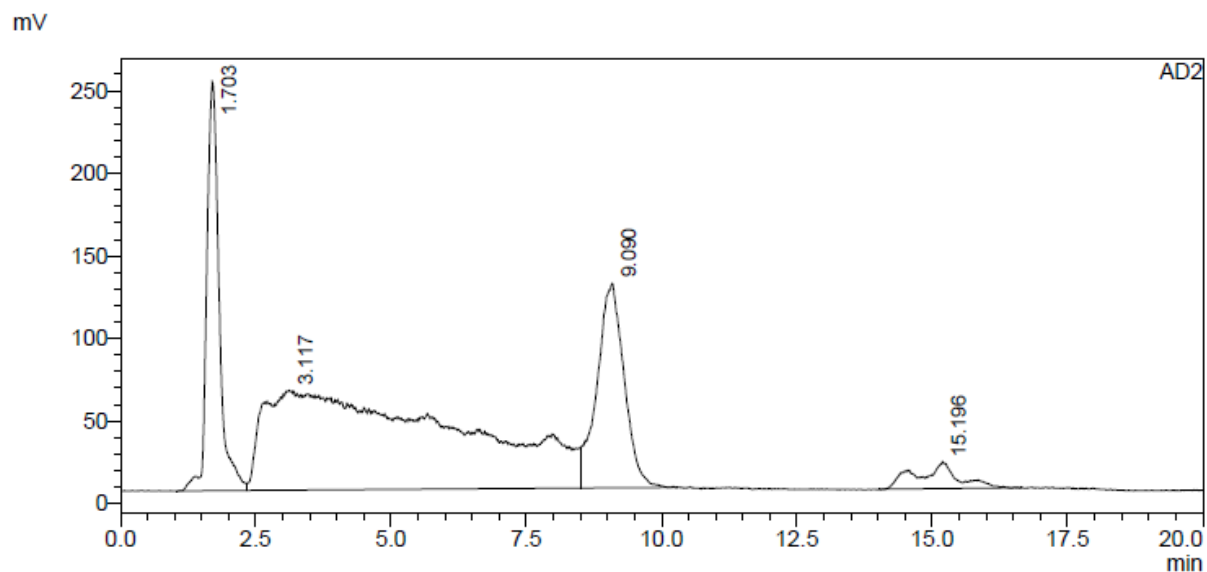

Crude Reaction Mixture (with internal standard) – UV Detector

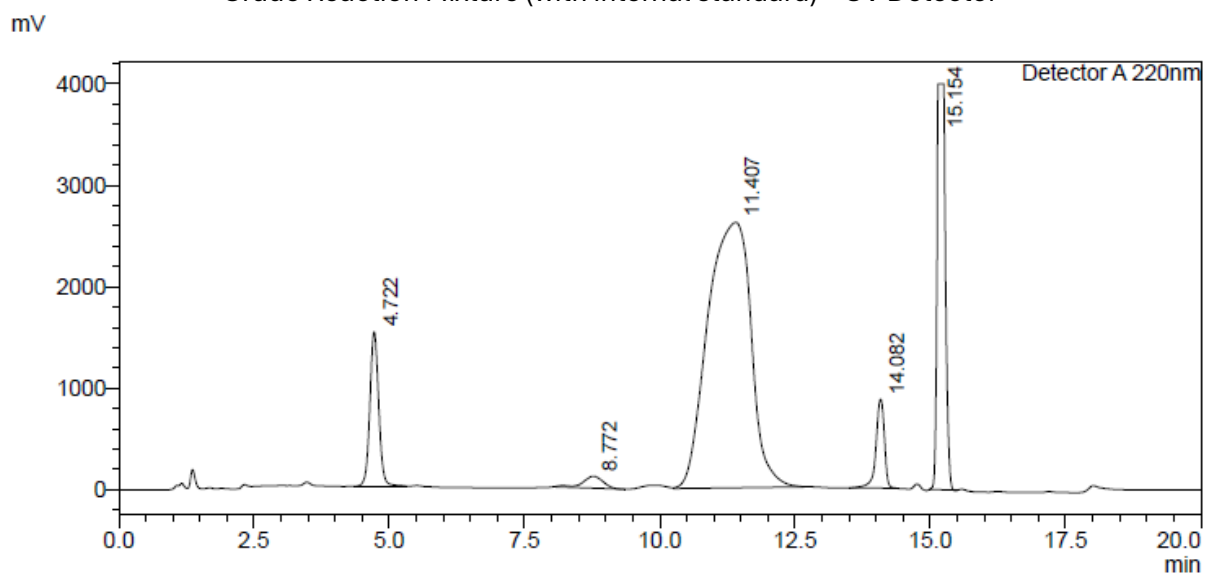

Crude Reaction Mixture – Gamma Detector

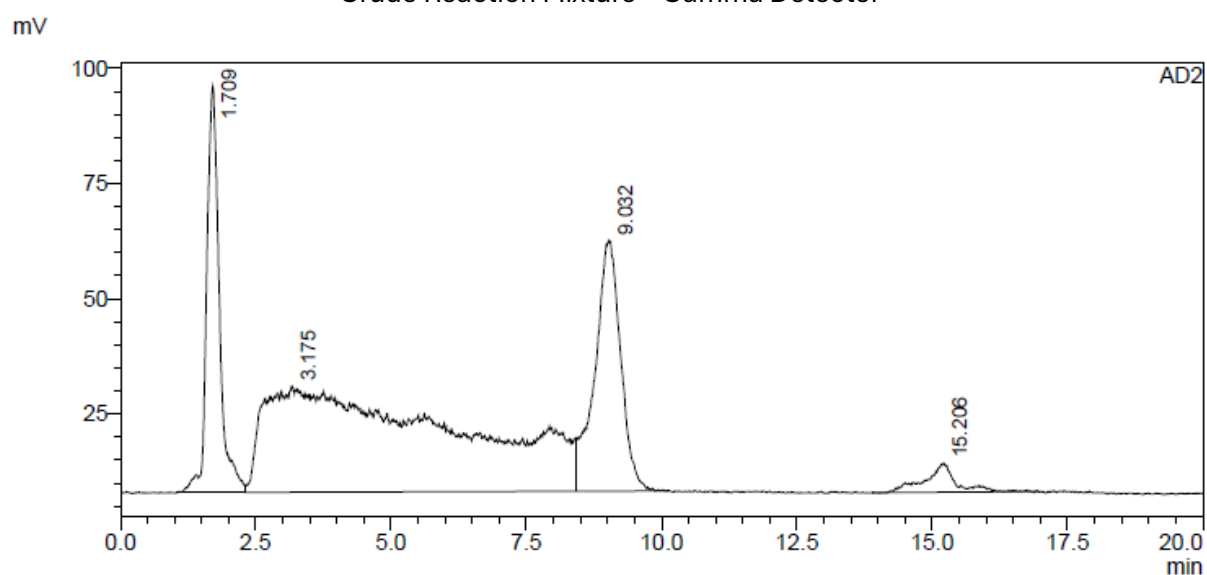

HPLC condition **C (X = 40)**, injection volume 5  $\mu$ L, peak at 8.772 (UV) and 9.032 (Rad), RCY 20%.

4j

(Base = 2 eq. <sup>t</sup>BuOK)

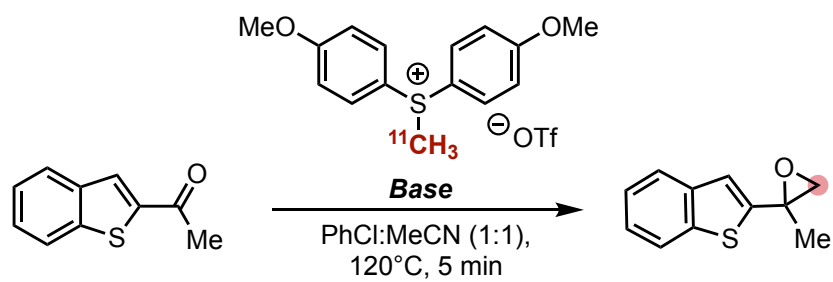

Standard - UV Detector

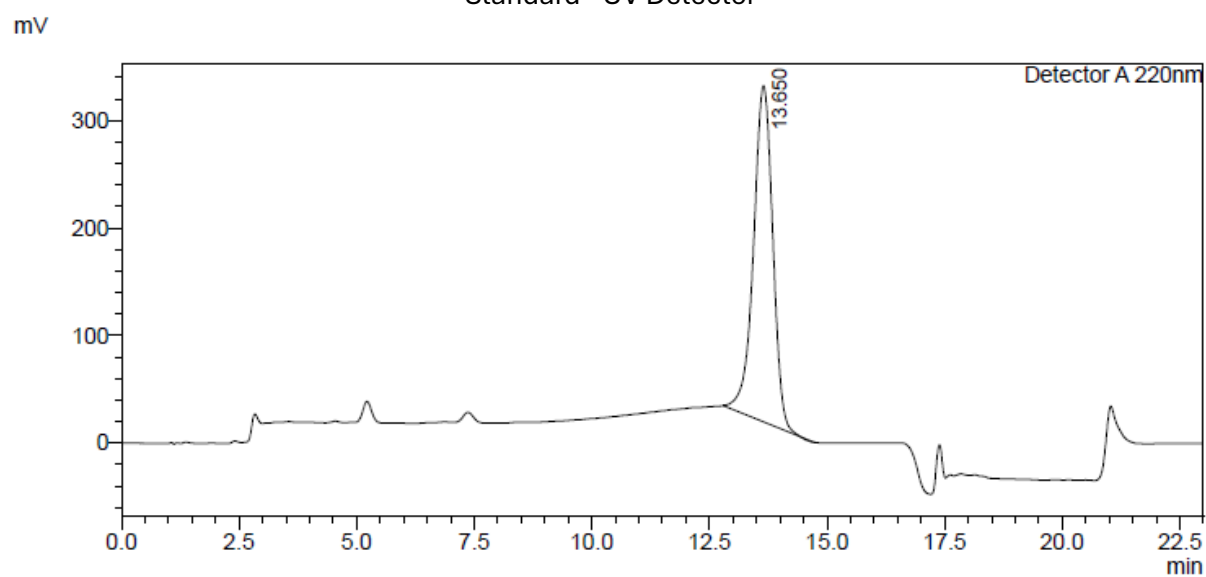

Crude Reaction Mixture (without internal standard) – UV Detector

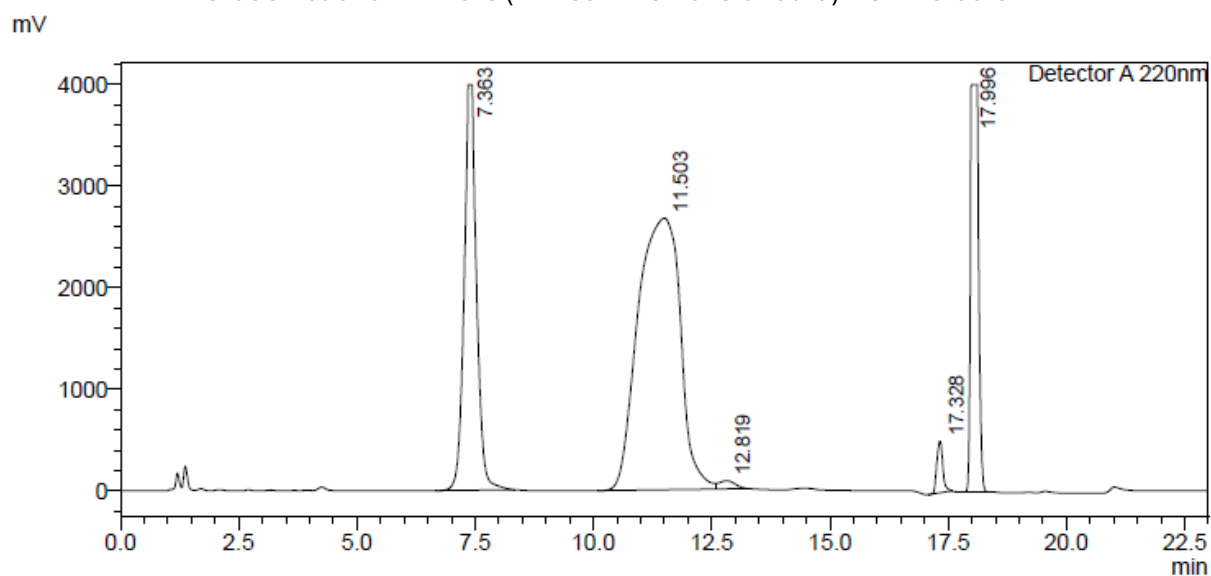

Crude Reaction Mixture – Gamma Detector

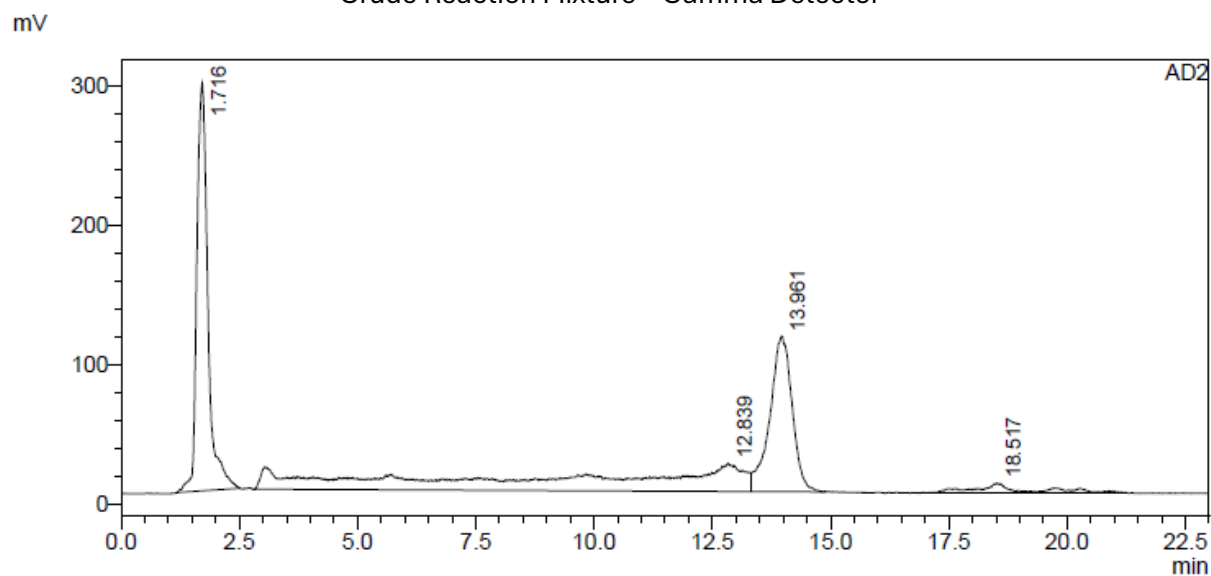

Crude Reaction Mixture (with internal standard) – UV Detector

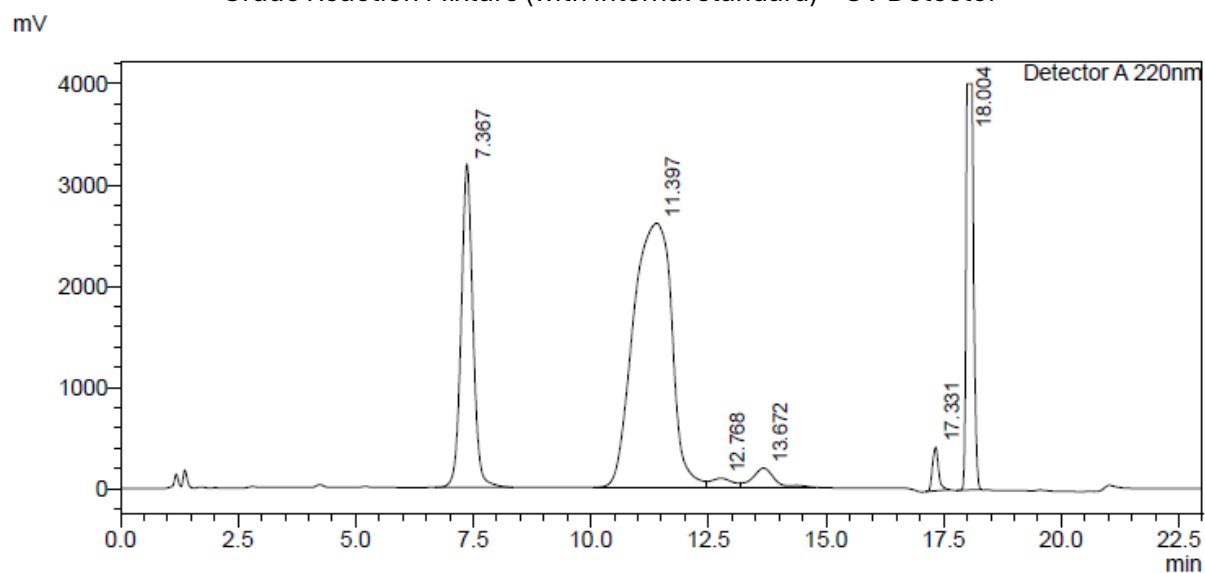

Crude Reaction Mixture – Gamma Detector

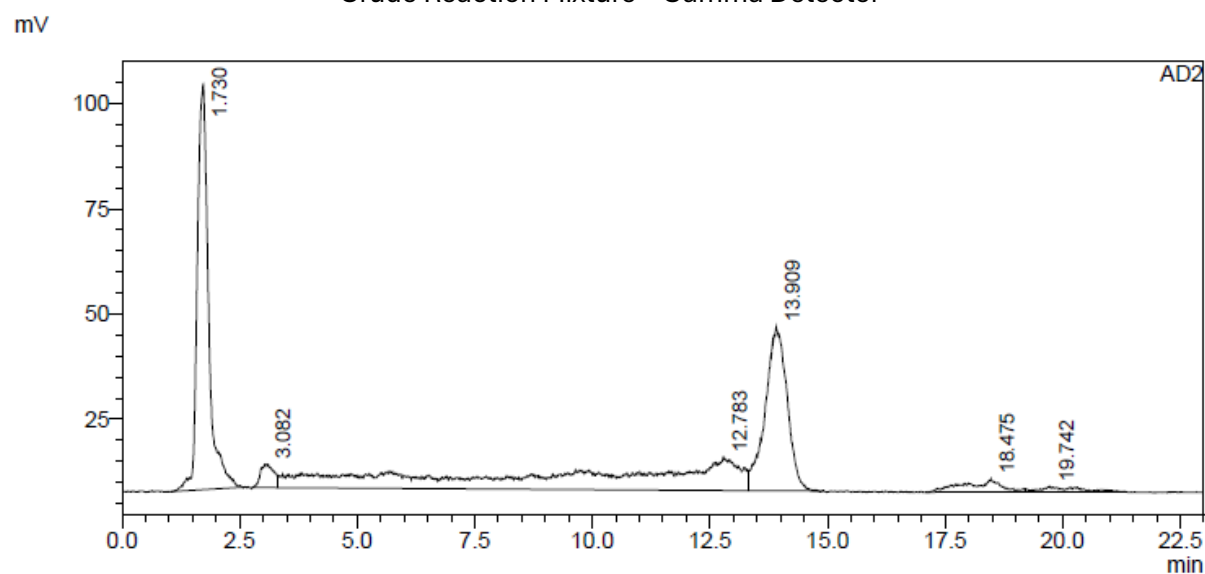

HPLC condition **B** (**X = 40**), injection volume 5  $\mu$ L, peak at 13.672 (UV) and 13.909 (Rad), RCY **25%**.

**4k**

(Base = 2 eq. KOTBu)

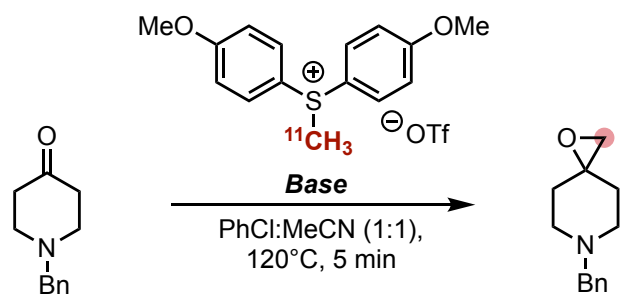

Standard - UV Detector

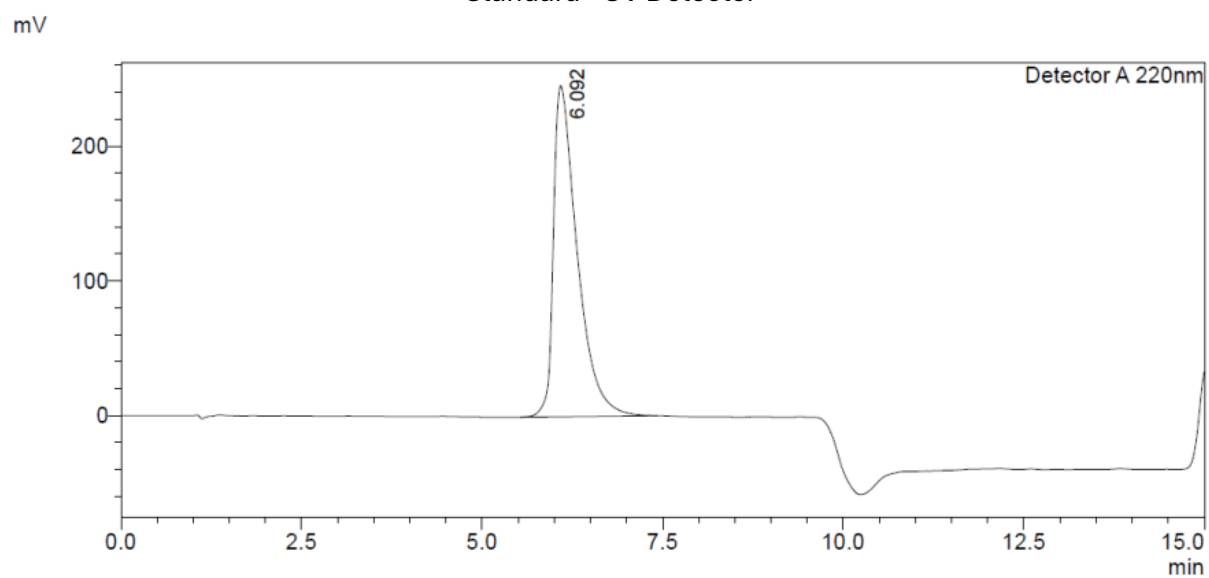

Crude Reaction Mixture (without internal standard) – UV Detector

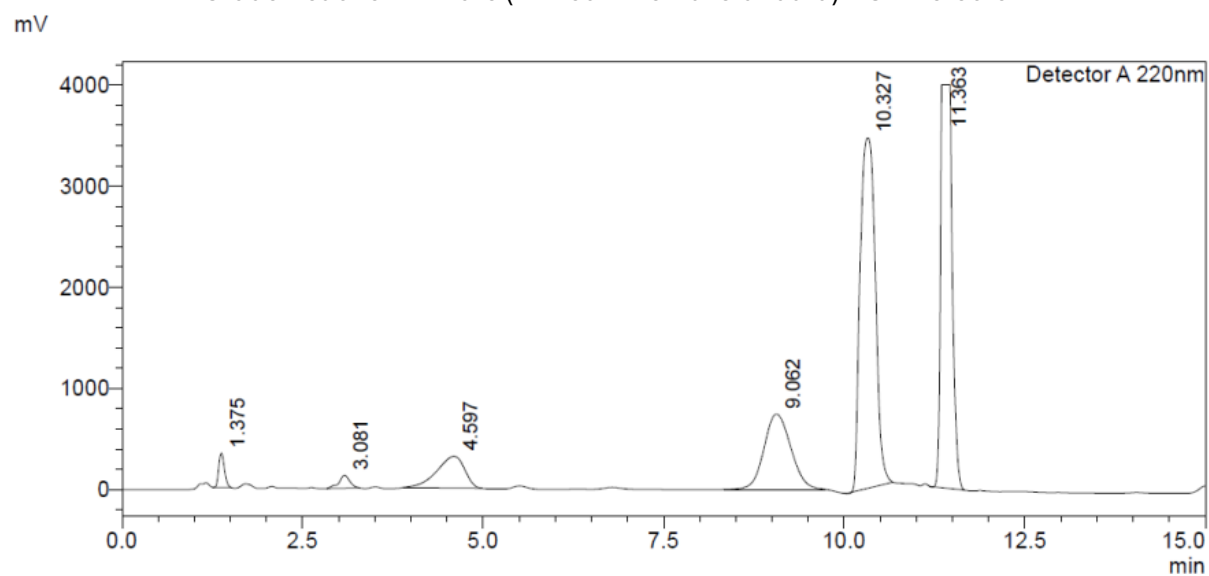

Crude Reaction Mixture – Gamma Detector

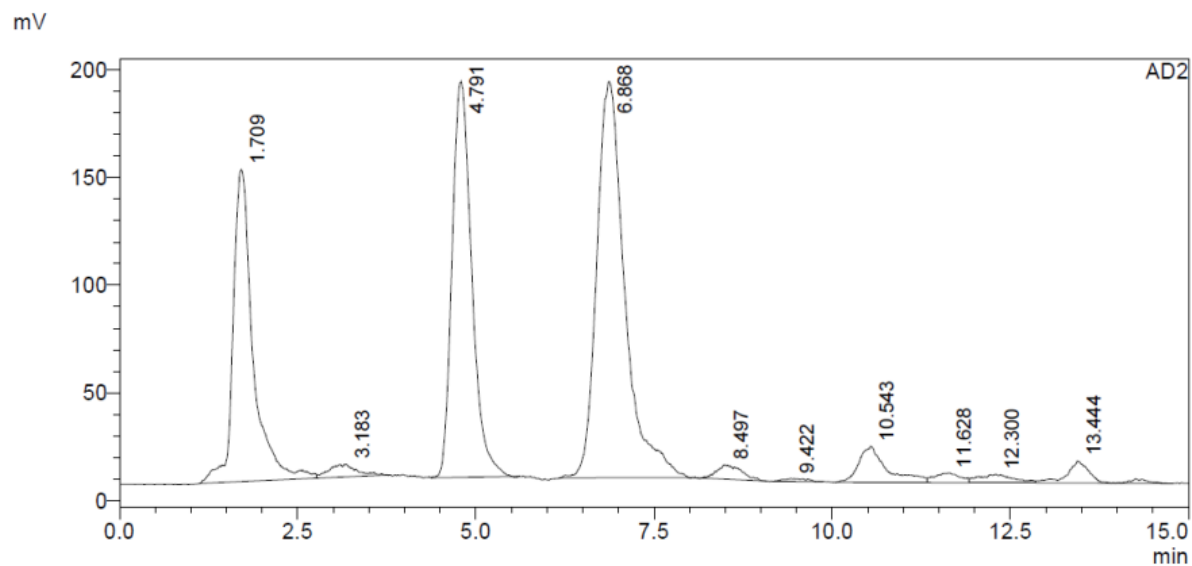

Crude Reaction Mixture (with internal standard) – UV Detector

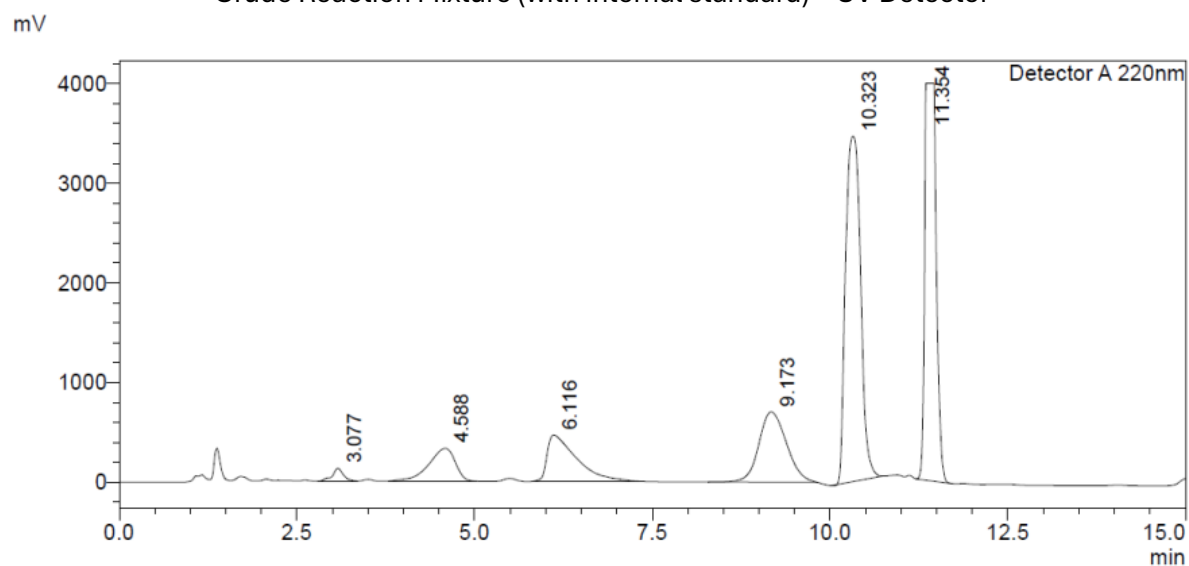

Crude Reaction Mixture – Gamma Detector

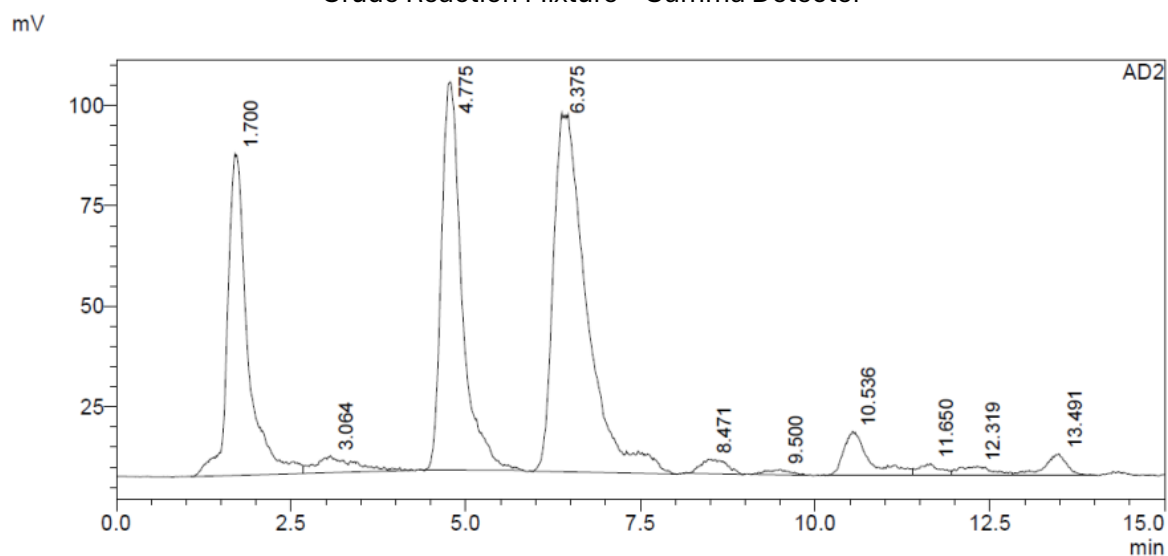

HPLC condition **A (X = 40)**, injection volume 5  $\mu$ L, in crude reaction mixture compound of interest peak at 6.116 (UV) and 6.375 (Rad); RCY **40%**.

4l

(Base = 1 eq. KOTBu)

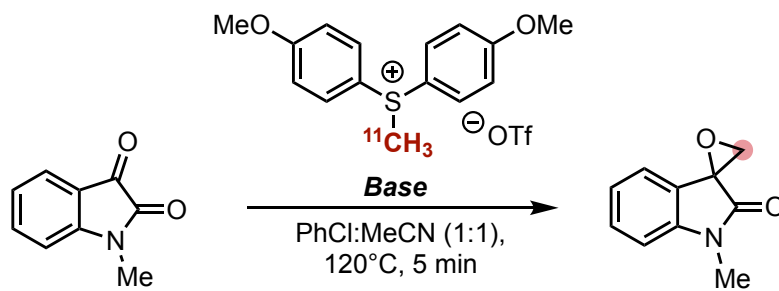

Standard - UV Detector

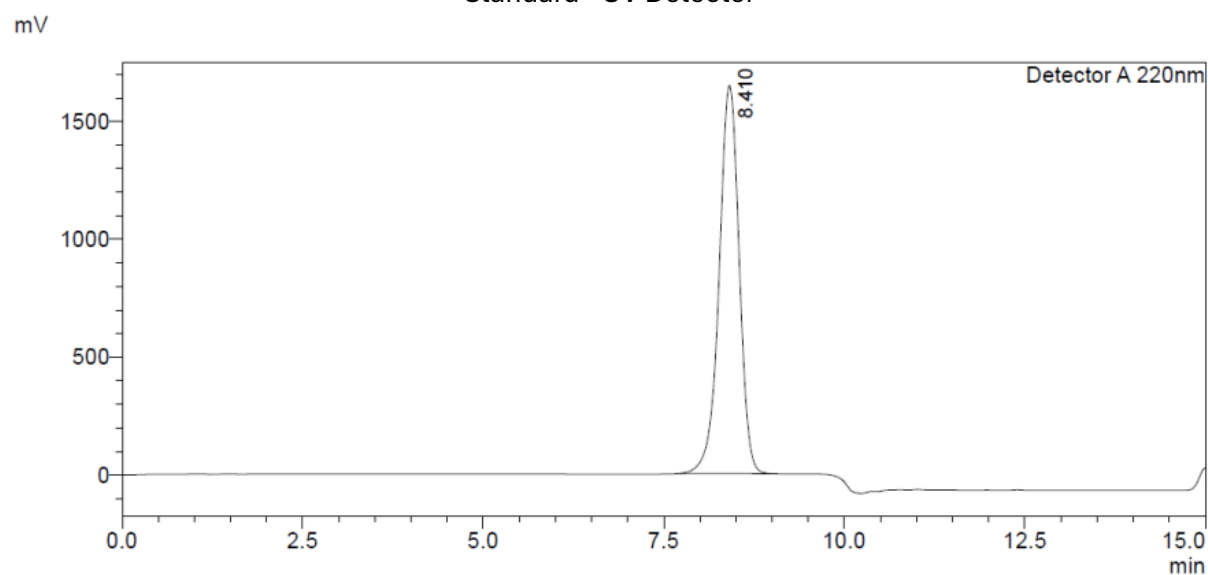

Crude Reaction Mixture (without internal standard) – UV Detector

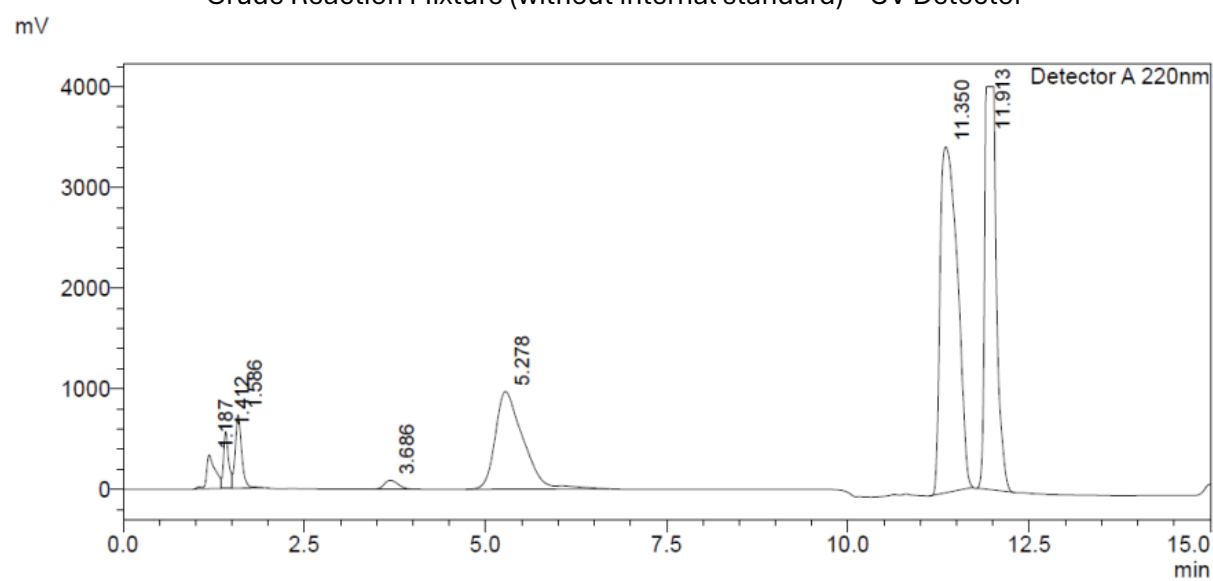

Crude Reaction Mixture – Gamma Detector

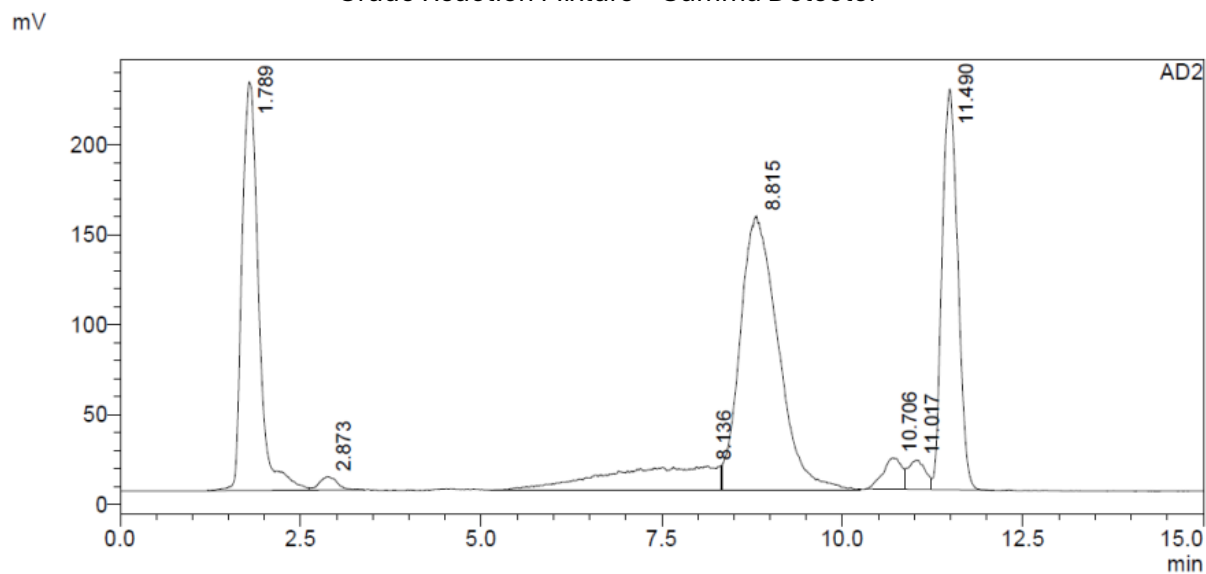

Crude Reaction Mixture (with internal standard) – UV Detector

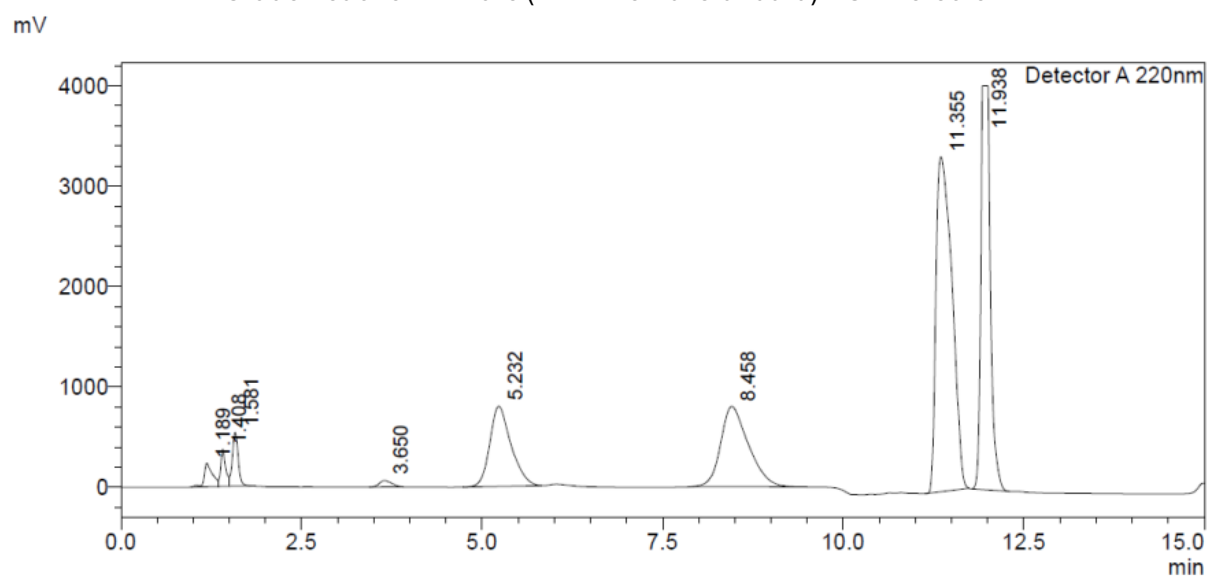

Crude Reaction Mixture – Gamma Detector

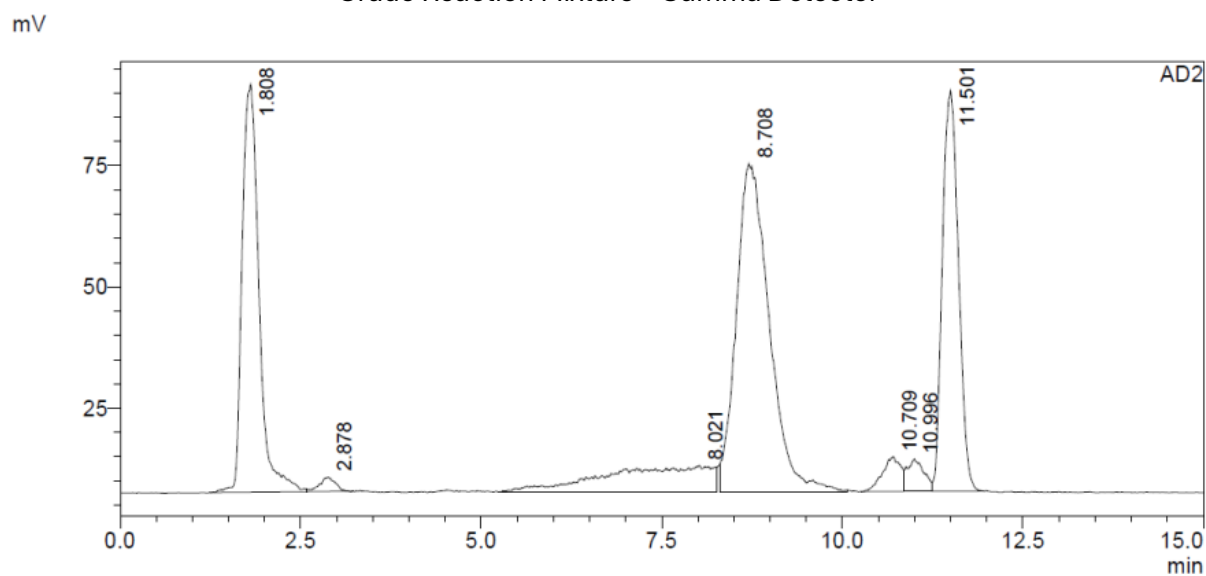

HPLC condition A (X = 20), injection volume 5  $\mu$ L, peak at 8.458 (UV) and 8.708 (Rad), RCY 38%.



4m

(Base = 1eq. <sup>t</sup>BuOK)

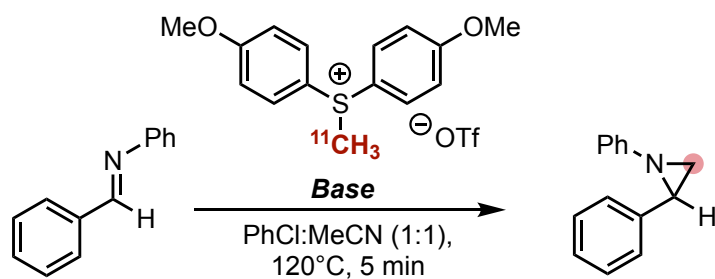

Standard - UV Detector

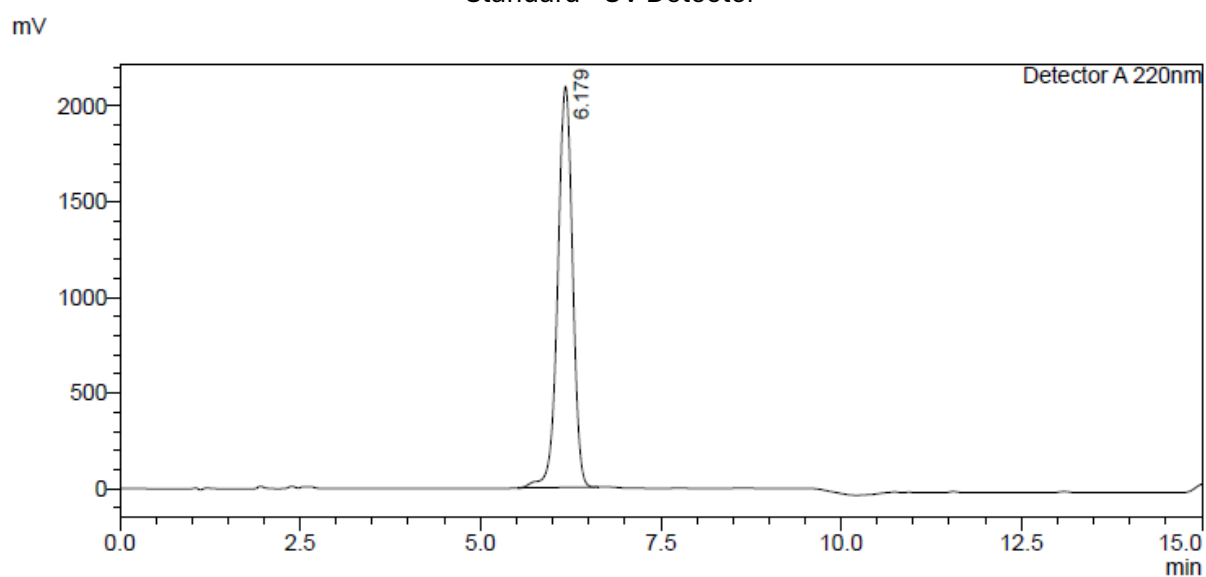

Crude Reaction Mixture (without internal standard) – UV Detector

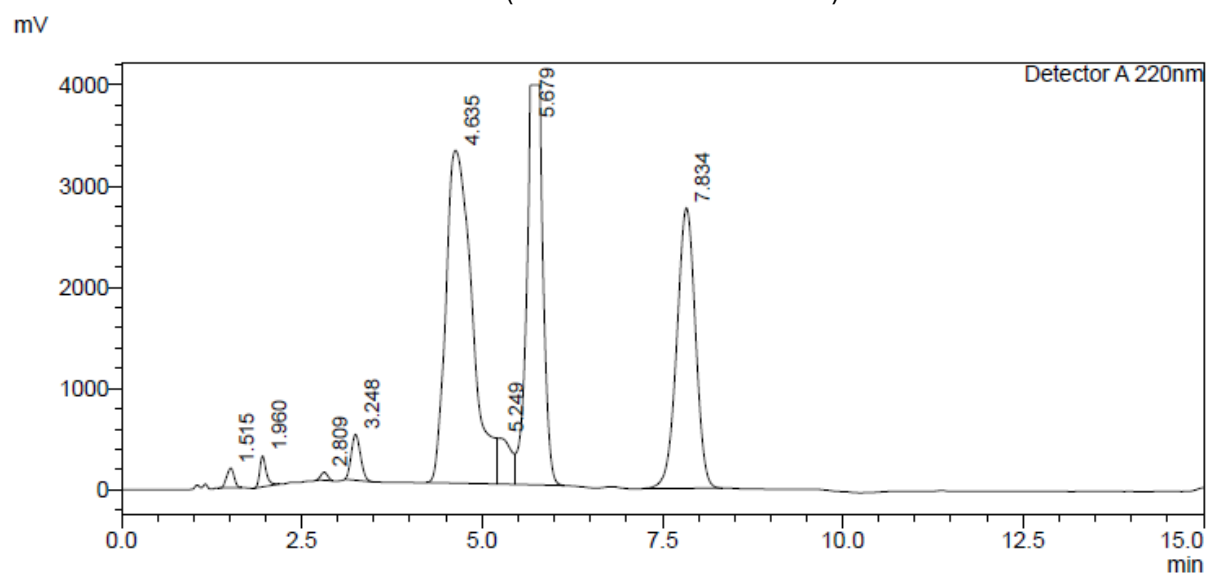

Crude Reaction Mixture – Gamma Detector

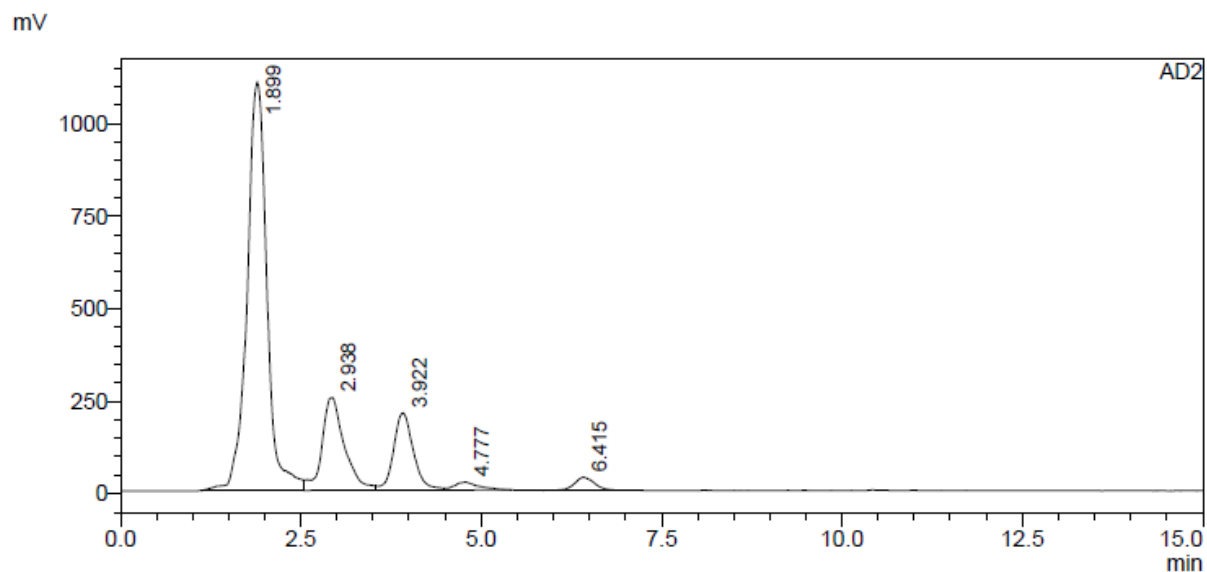

Crude Reaction Mixture (with internal standard) – UV Detector

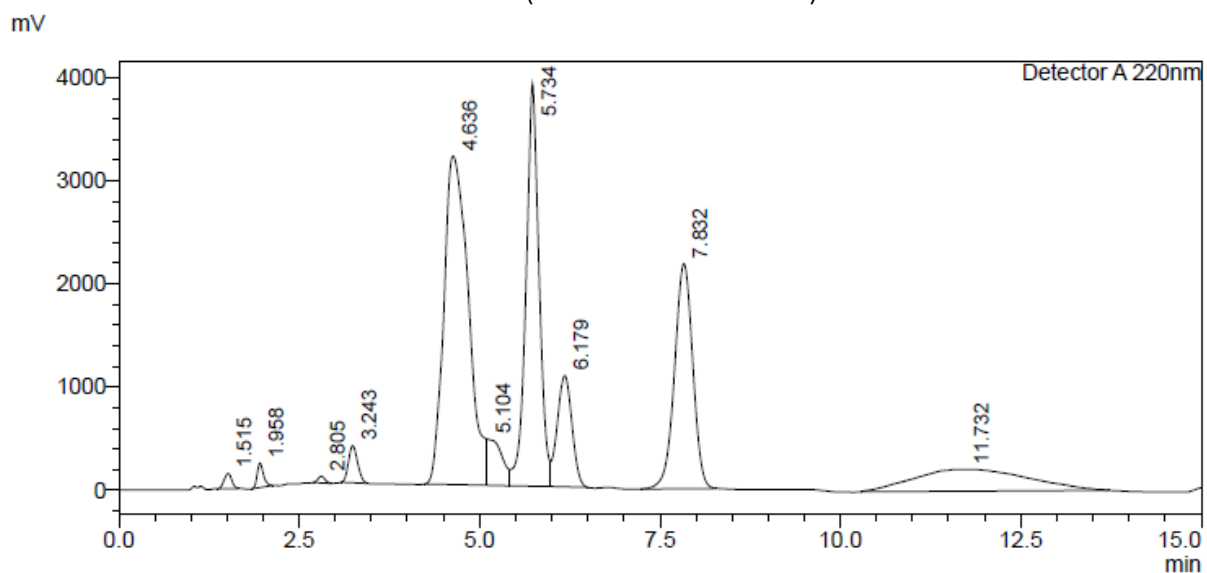

Crude Reaction Mixture – Gamma Detector

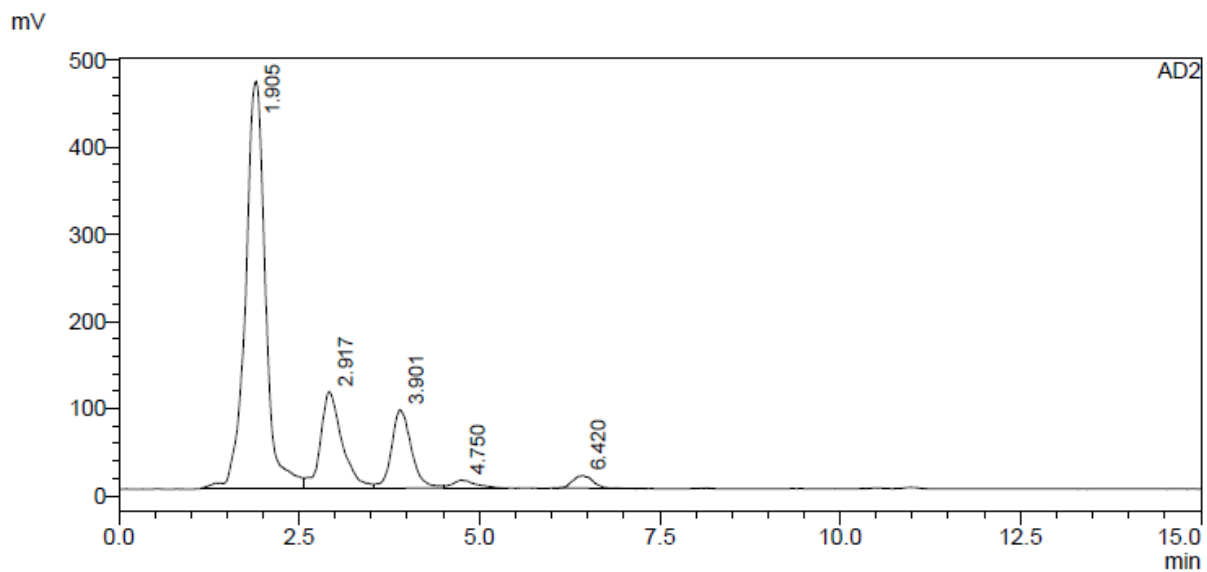

HPLC condition **A (X = 55)**, injection volume 5  $\mu$ L, peak at 6.179 (UV) and 6.420 (Rad), RCY **2%**.

**4n**

(Base = 1eq. P<sub>2</sub>-et)

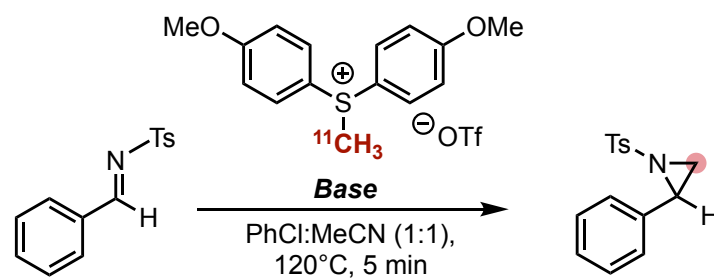

Standard - UV Detector

mV

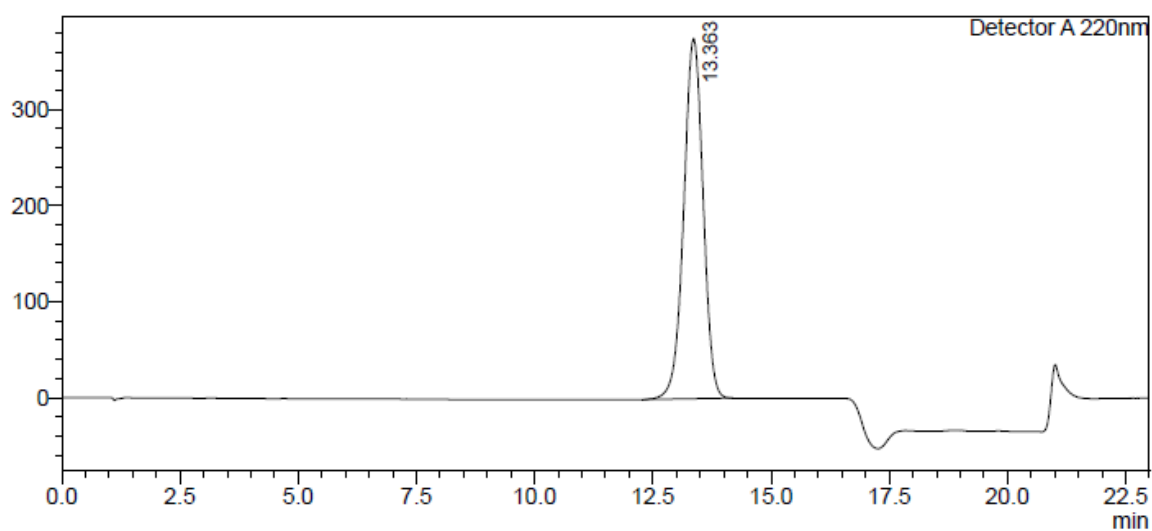

Crude Reaction Mixture (without internal standard) – UV Detector

mV

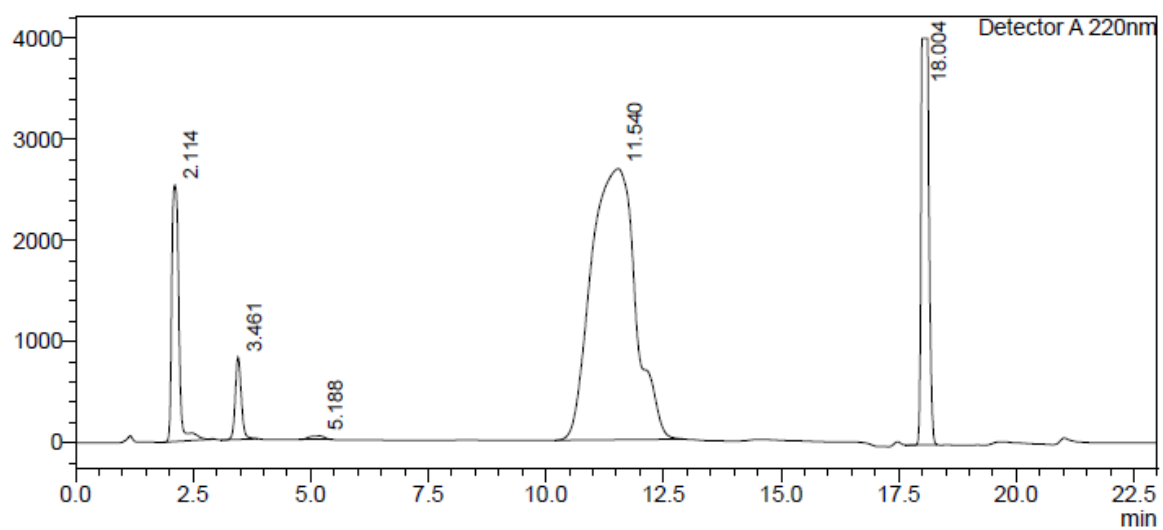

Crude Reaction Mixture – Gamma Detector

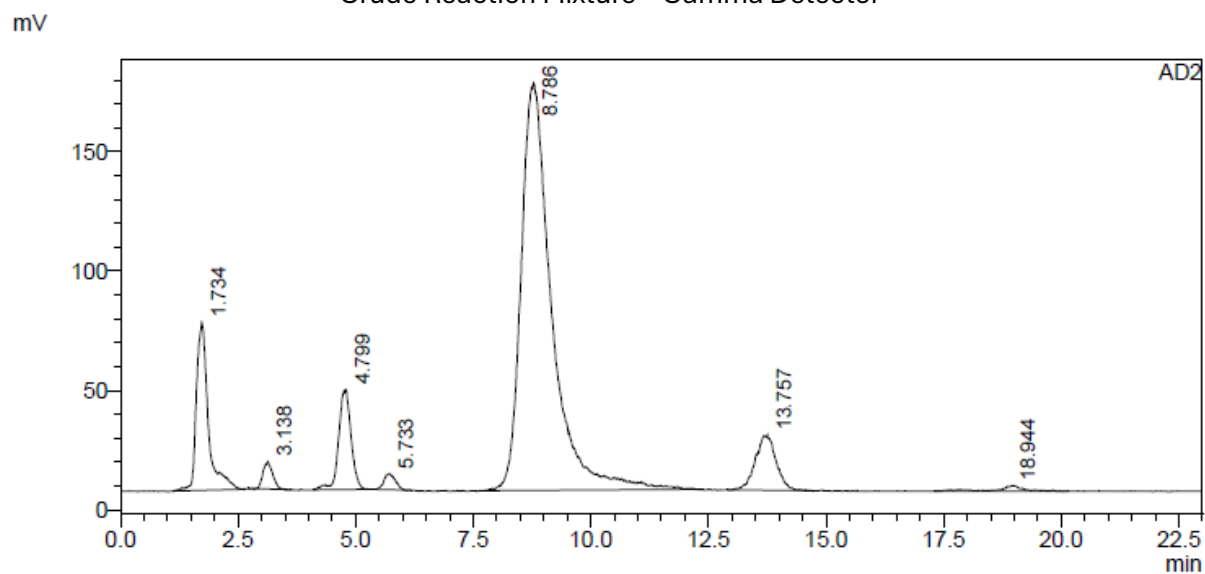

Crude Reaction Mixture (with internal standard) – UV Detector

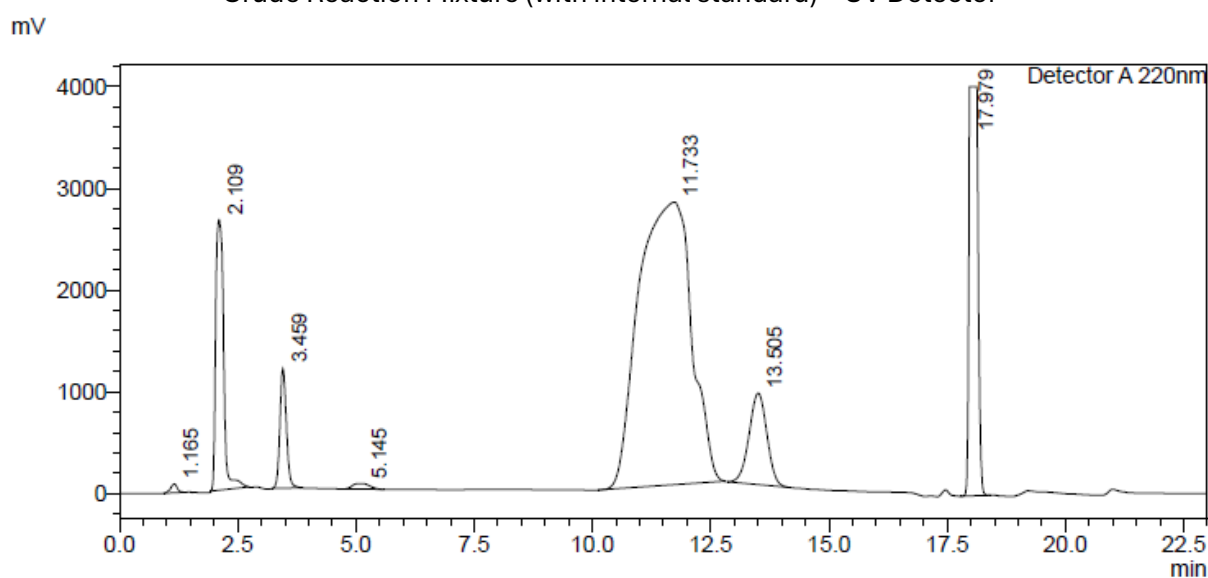

Crude Reaction Mixture – Gamma Detector

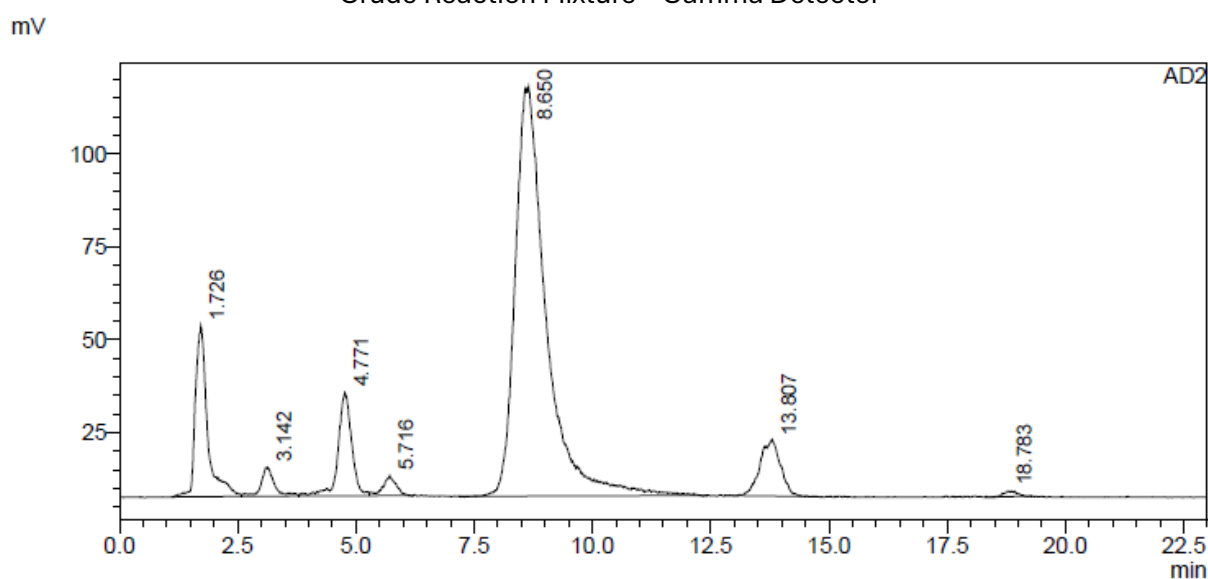

HPLC condition **B (X = 40)**, injection volume 5-10  $\mu\text{L}$ , peak at 13.505 (UV) and 13.807 (Rad), RCY **7%**.

**4o**

(1eq. <sup>t</sup>BuOK)

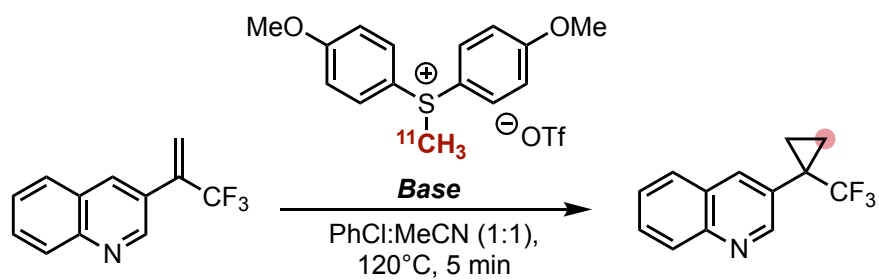

Standard - UV Detector

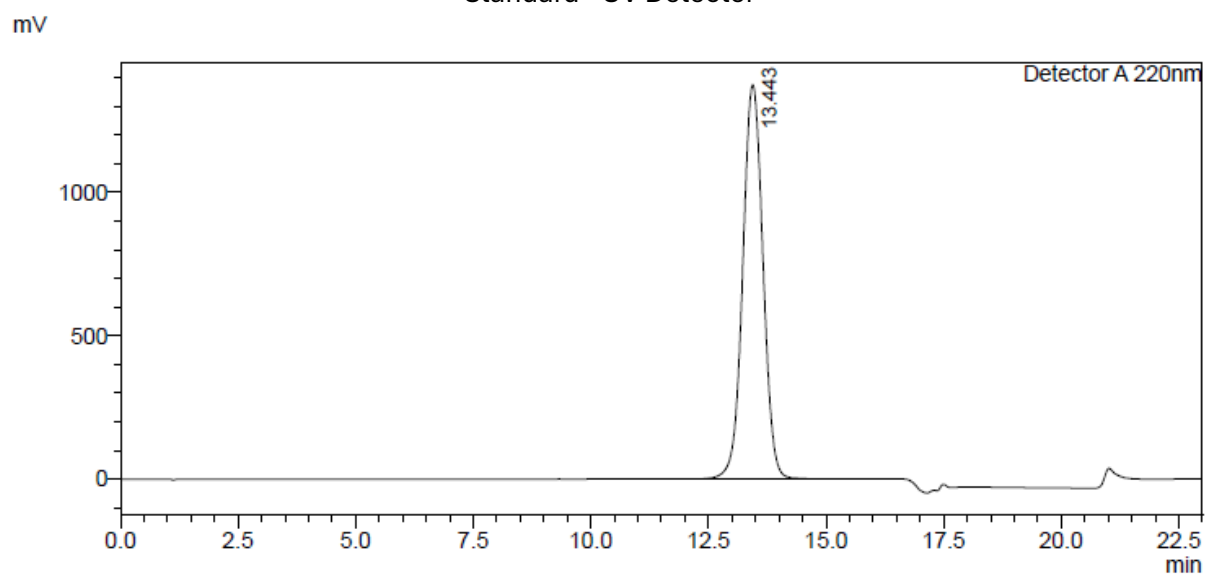

Crude Reaction Mixture (without internal standard) – UV Detector

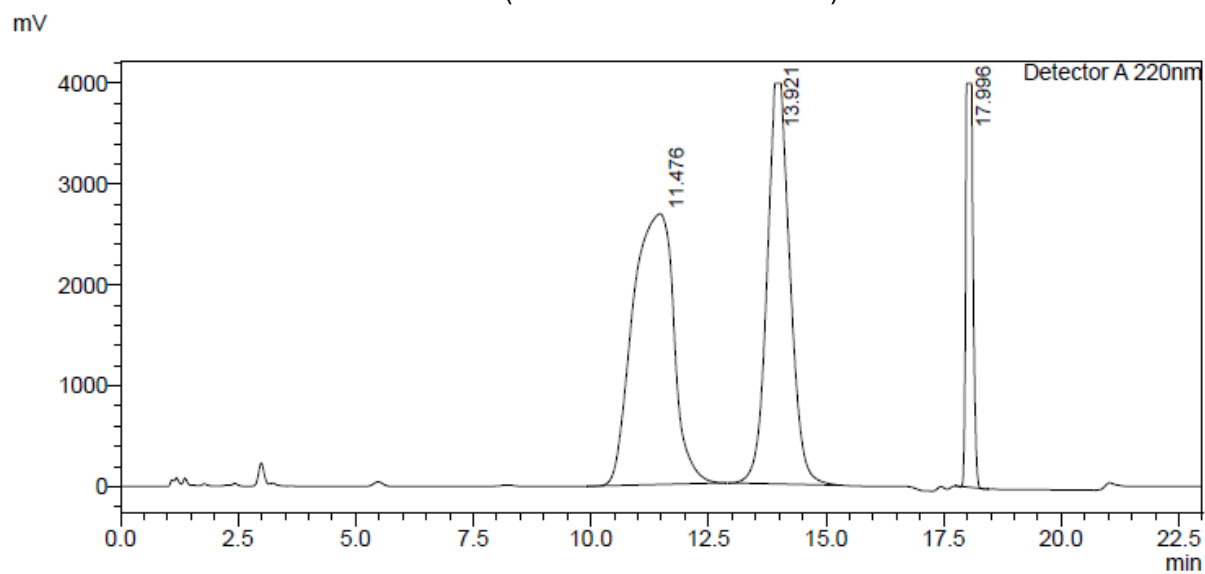

Crude Reaction Mixture – Gamma Detector

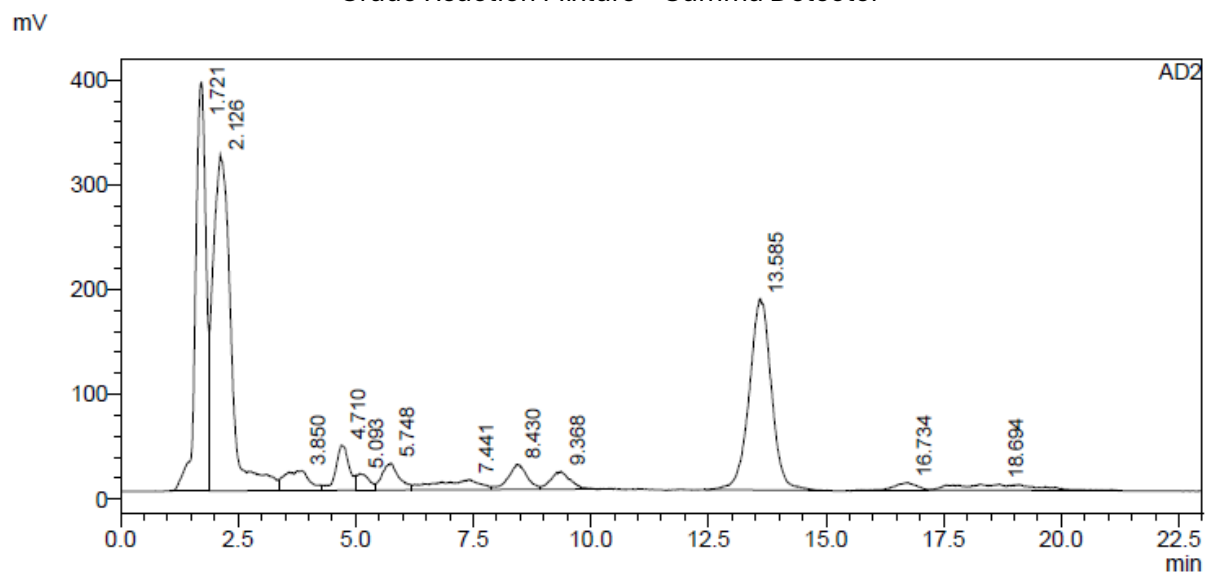

Crude Reaction Mixture (with internal standard) – UV Detector

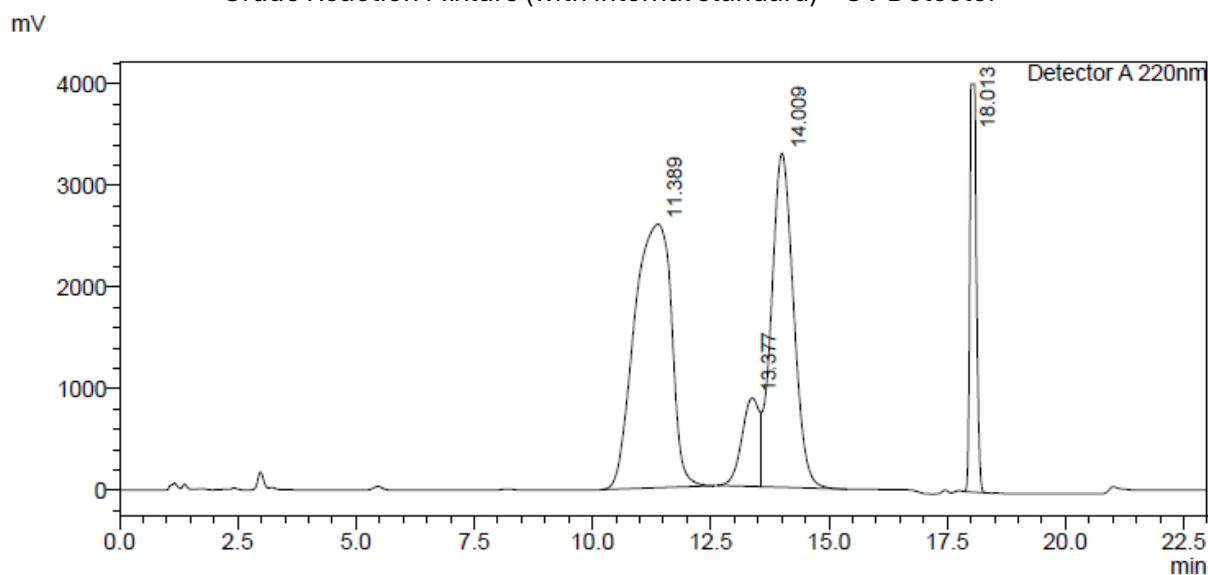

Crude Reaction Mixture – Gamma Detector

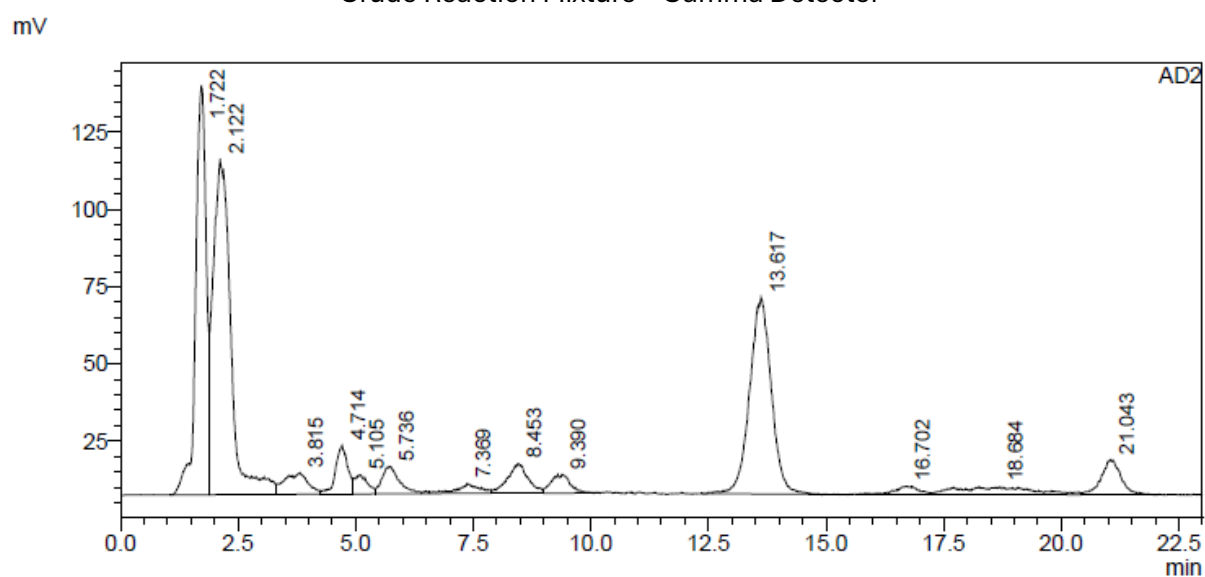

HPLC condition **B** (**X = 40**), injection volume 5  $\mu$ L, peak at 13.377 (UV) and 13.617 (Rad), RCY **23%**.

**4p**

(Base = 2 eq. KOTBu)

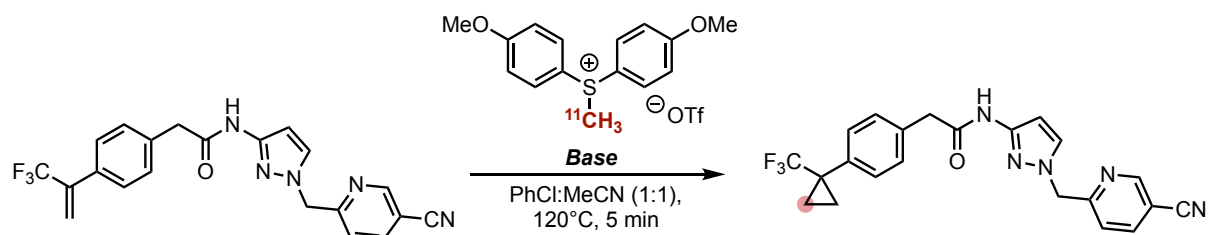

Standard - UV Detector

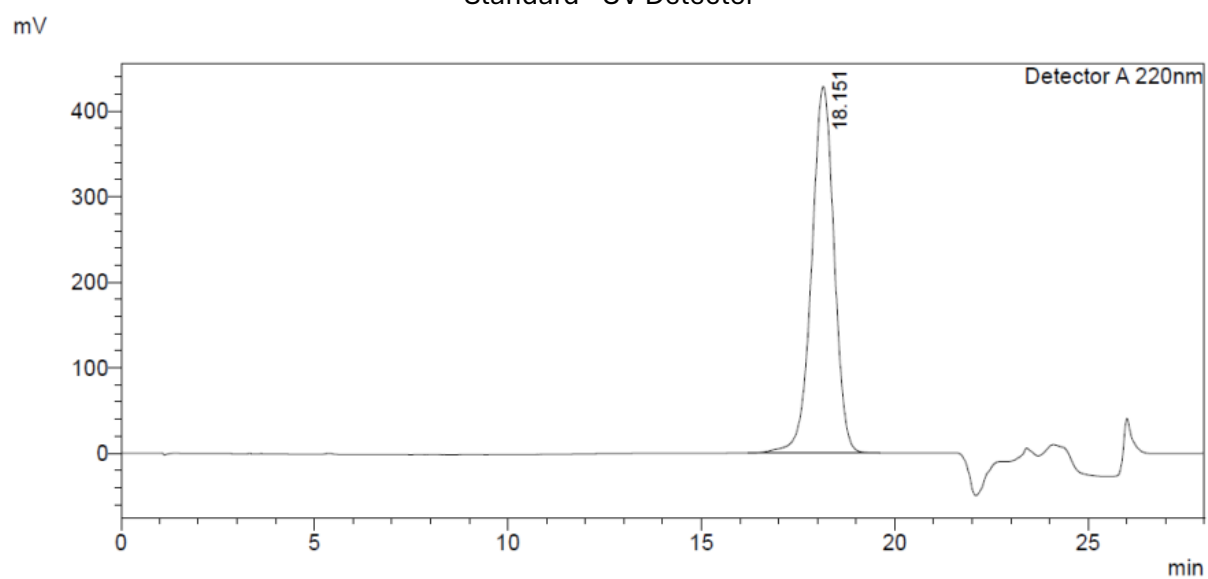

Crude Reaction Mixture (without internal standard) – UV Detector

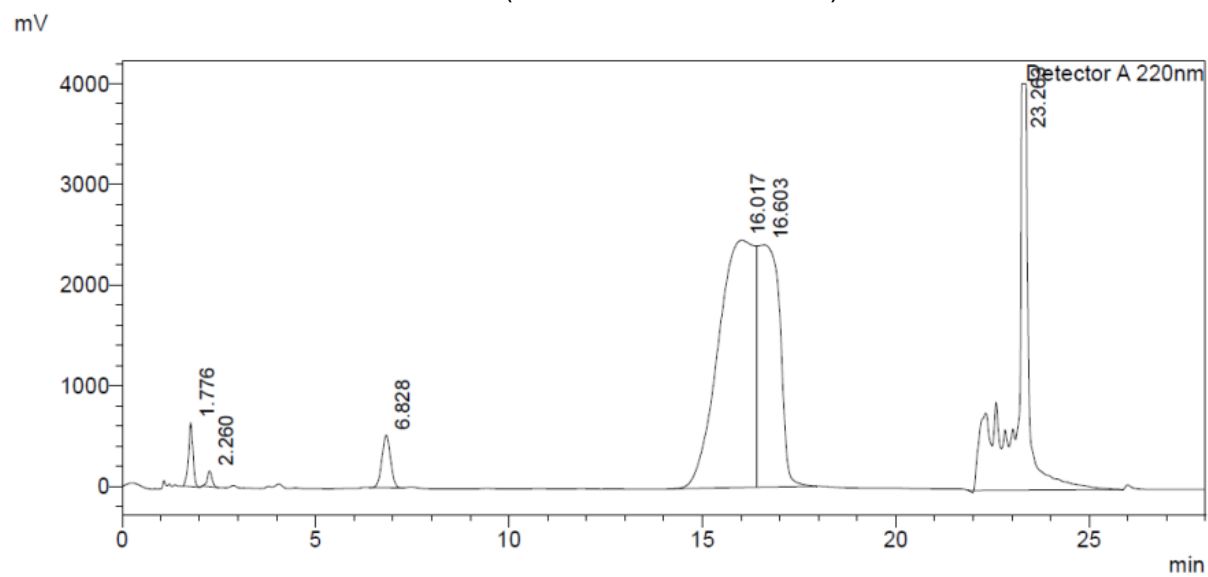

Crude Reaction Mixture – Gamma Detector

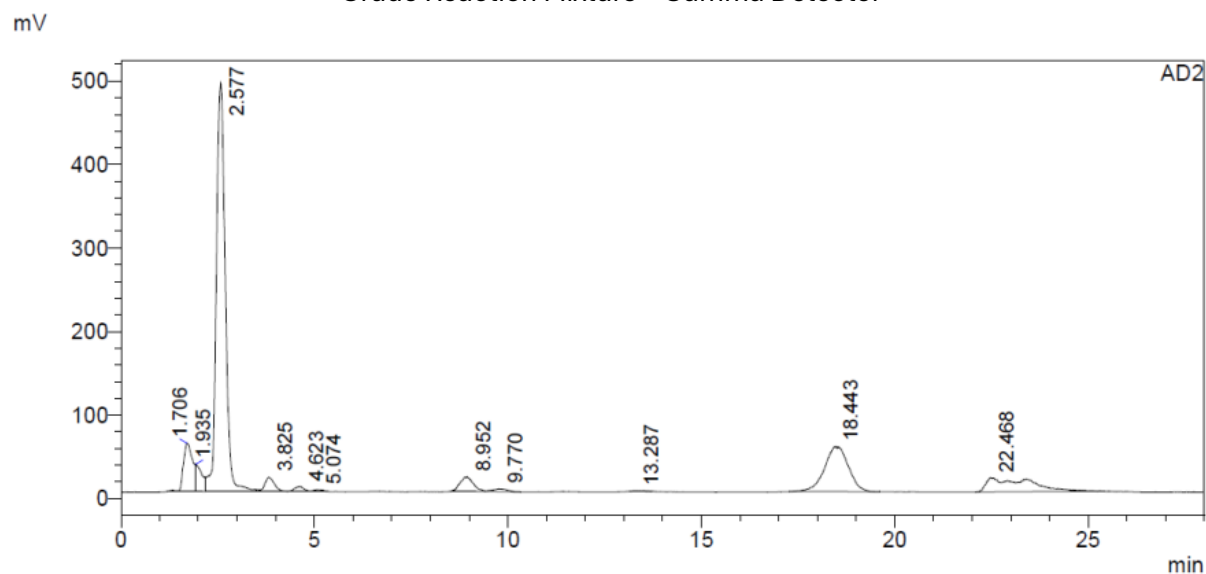

Crude Reaction Mixture (with internal standard) – UV Detector

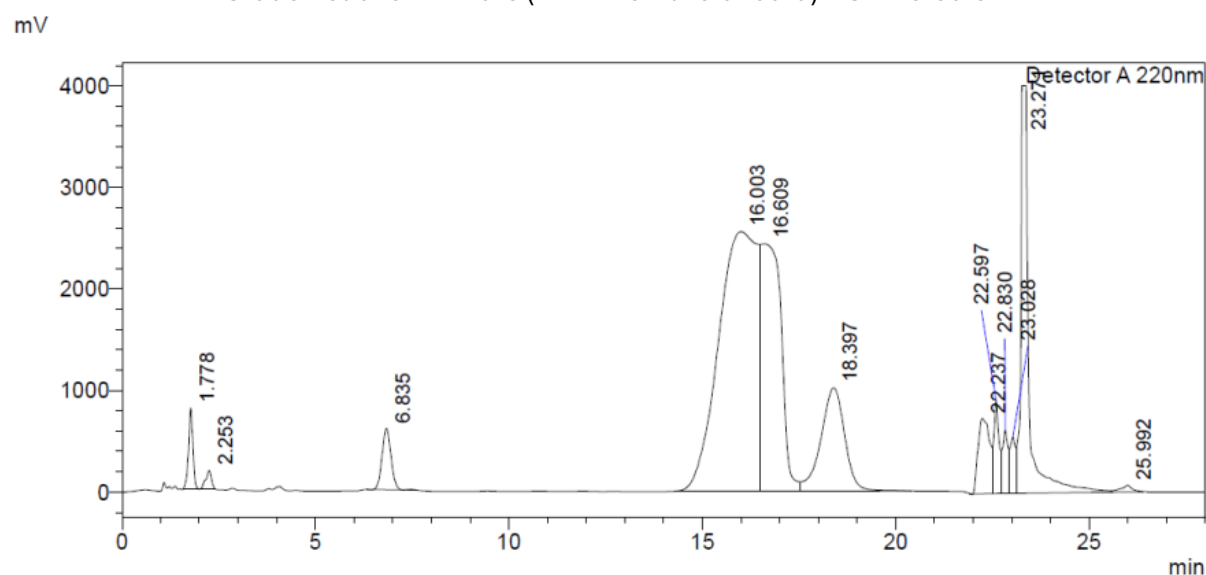

Crude Reaction Mixture – Gamma Detector

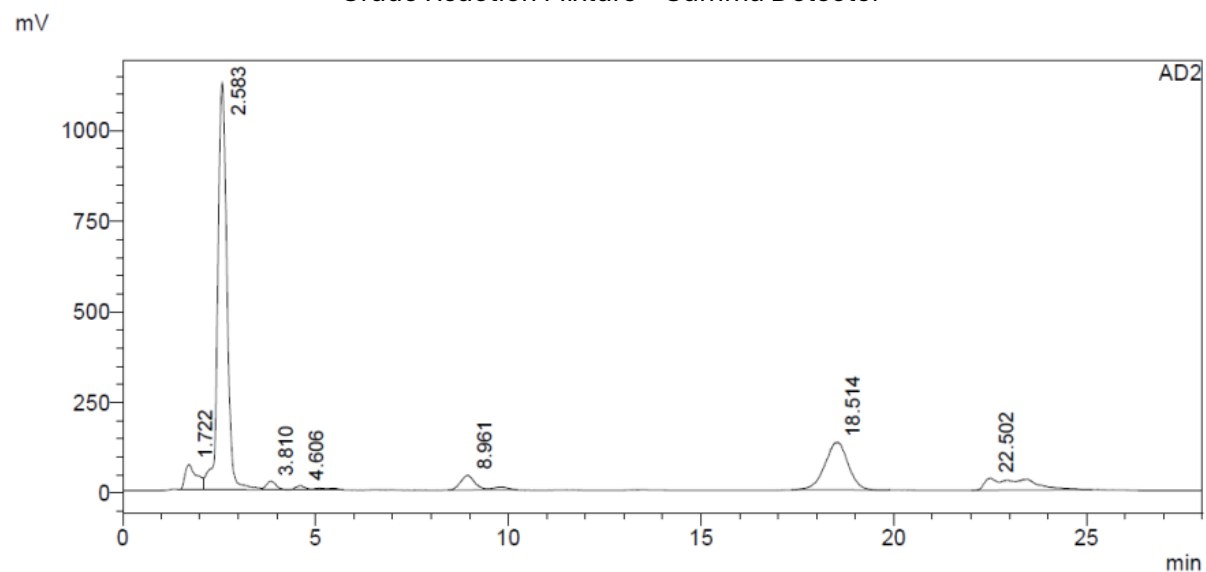

HPLC condition **E (X = 35)**, injection volume 5  $\mu$ L, peak at 18.397 (UV) and 18.514 (Rad), RCY **18%**.



5

(Base = 2 eq. KOtBu)

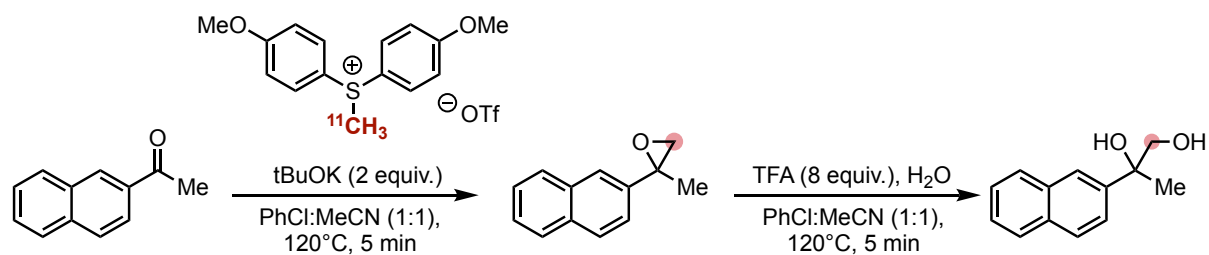

Standard - UV Detector

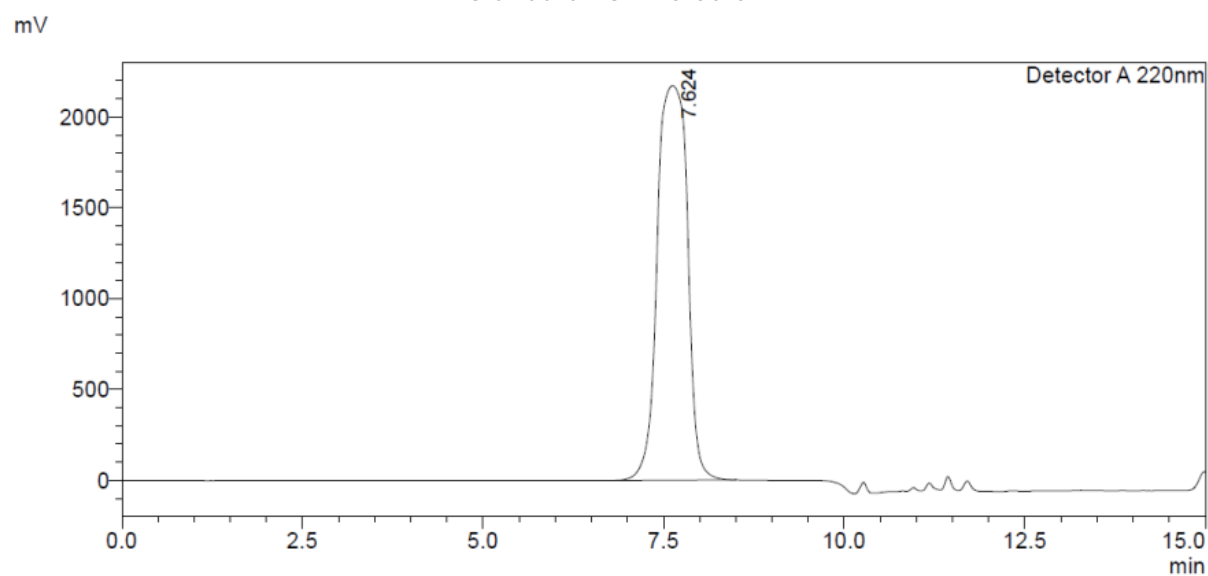

Crude Reaction Mixture (without internal standard) – UV Detector

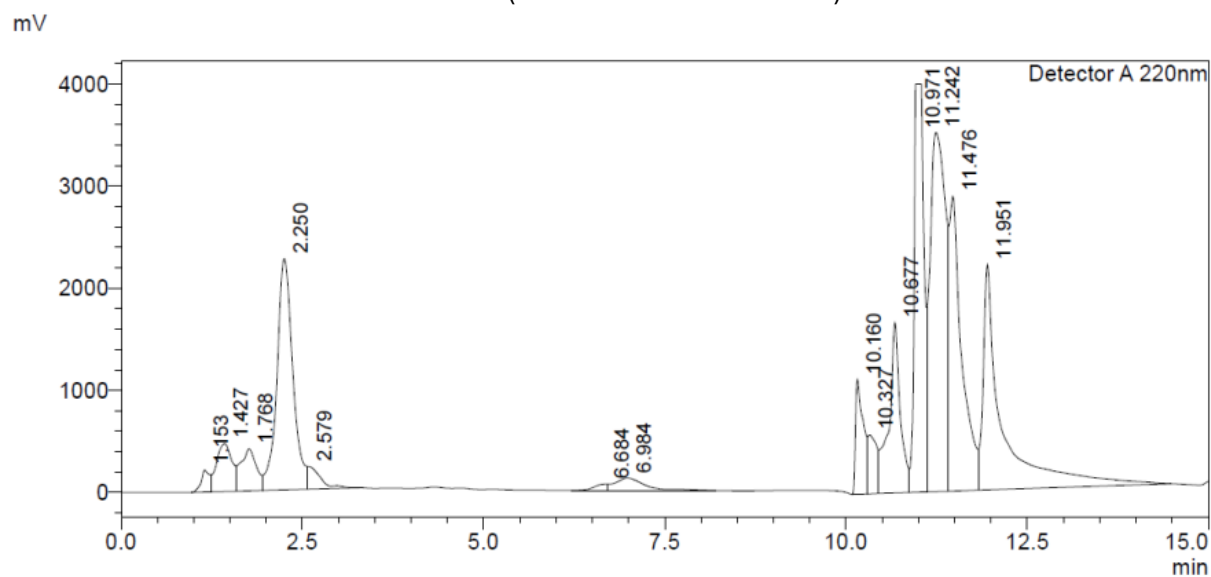

Crude Reaction Mixture – Gamma Detector

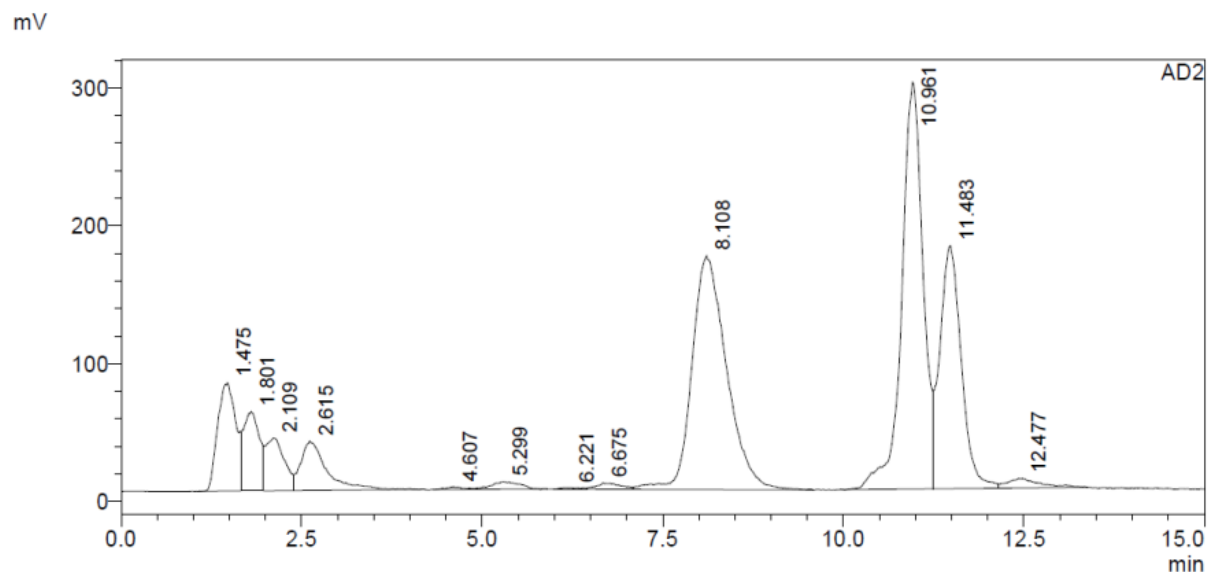

Crude Reaction Mixture (with internal standard) – UV Detector

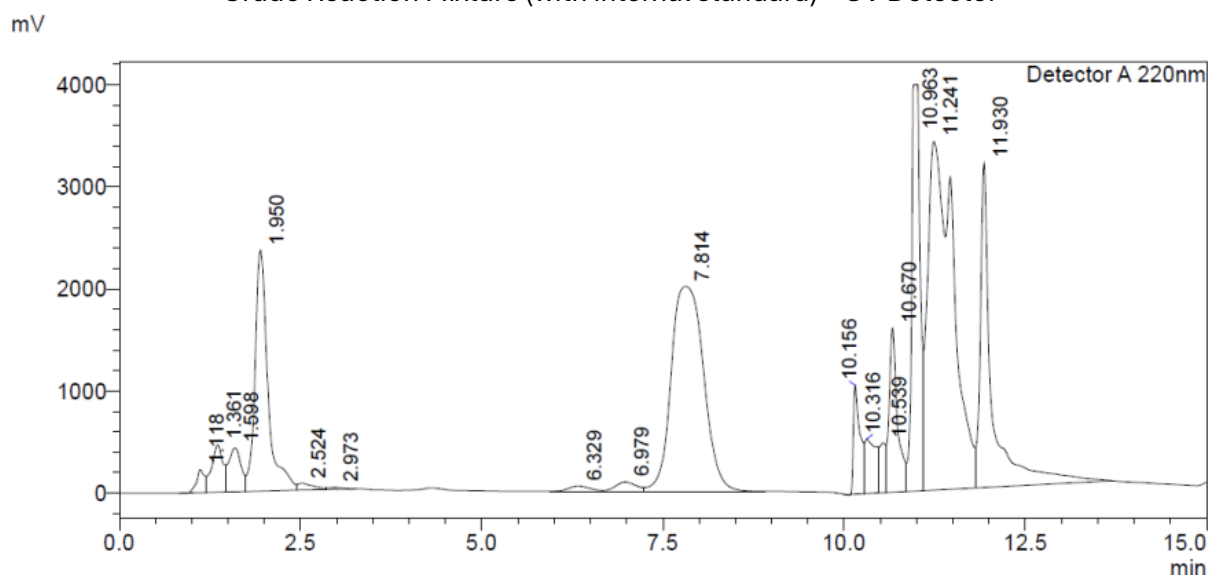

Crude Reaction Mixture – Gamma Detector

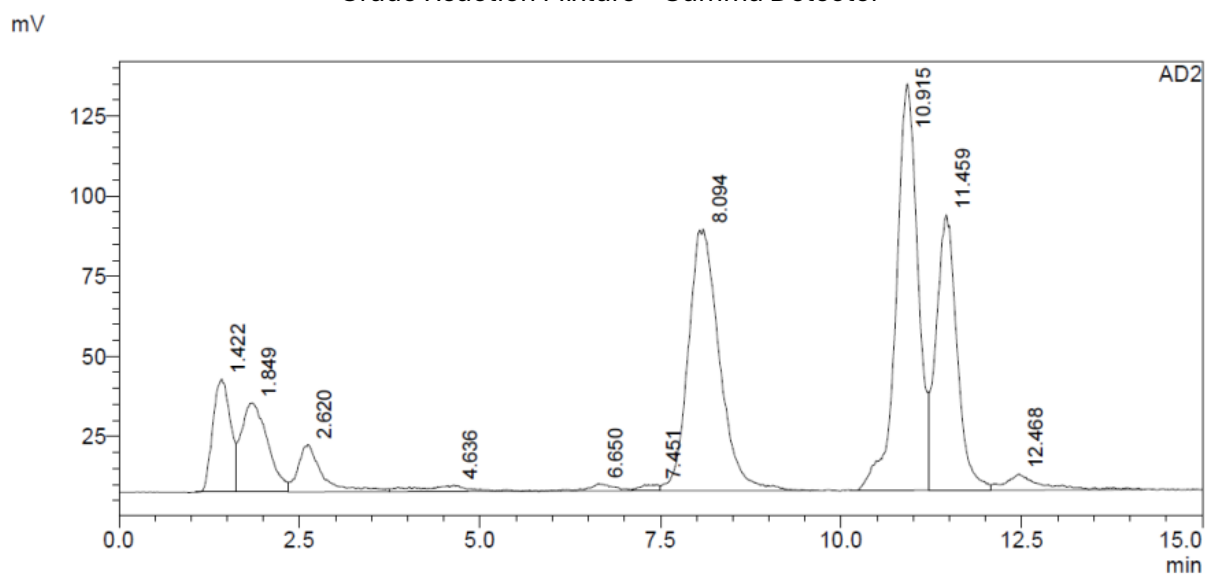

HPLC condition **A (X = 25)**, injection volume 5  $\mu$ L, peak at 7.814 (UV) and 8.094 (Rad), RCY **29%**.

## References

1. A. Theodorou, G. N. Papadopoulos and C. G. Kokotos, *Tetrahedron*, 2013, **69**, 5438-5443.
2. K. Zhang, B.-H. Ren, X.-F. Liu, L.-L. Wang, M. Zhang, W.-M. Ren, X.-B. Lu and W.-Z. Zhang, *Angew. Chem. Int. Ed.*, 2022, **61**, e202207660.
3. P. A. Ulmann, A. B. Braunschweig, O.-S. Lee, M. J. Wiester, G. C. Schatz and C. A. Mirkin, *Chem. Commun.*, 2009, DOI: 10.1039/B908852K, 5121-5123.
4. G. He, S.-Y. Zhang, W. A. Nack, R. Pearson, J. Rabb-Lynch and G. Chen, *Org. Lett.*, 2014, **16**, 6488-6491.
5. D. J. Vyas, E. Larionov, C. Besnard, L. Guénée and C. Mazet, *J. Am. Chem. Soc.*, 2013, **135**, 6177-6183.
6. K. Kumar, D. Konar, S. Goyal, M. Gangar, M. Chouhan, R. K. Rawal and V. A. Nair, *The Journal of Organic Chemistry*, 2016, **81**, 9757-9764.
7. R. S. Tewari, A. K. Awasthi and A. Awasthi, *Synthesis*, 1983, **1983**, 330-331.
8. F. Minicone, W. J. Rogers, J. F. J. Green, M. Khan, G. M. T. Smith and C. D. Bray, *Tetrahedron Lett.*, 2014, **55**, 5890-5891.
9. P. Cyr, J. Flynn-Robitaille, P. Boissarie and A. Marinier, *Org. Lett.*, 2019, **21**, 2265-2268.
10. O. Bezençon, B. Heidmann, R. Siegrist, S. Stamm, S. Richard, D. Pozzi, O. Corminboeuf, C. Roch, M. Kessler, E. A. Ertel, I. Reymond, T. Pfeifer, R. de Kanter, M. Toeroek-Schafroth, L. G. Moccia, J. Mawet, R. Moon, M. Rey, B. Capeleto and E. Fournier, *J. Med. Chem.*, 2017, **60**, 9769-9789.
11. P.-J. Xia, F. Liu, S.-H. Li and J.-A. Xiao, *Organic Chemistry Frontiers*, 2022, **9**, 709-714.
12. Y. Tian, Y. Zhang, J. Niu and C. Zhang, *ChemCatChem*, 2024, **16**, e202400972.
